# Supplementary material for: Beyond the carapace: skull shape variation and morphological systematics of long-nosed armadillos (genus Dasypus)
Source: PeerJ. 2017 Aug 15;5:e3650. doi: 10.7717/peerj.3650 (PMC5562145; doi:10.7717/peerj.3650)
Supplement: Supplemental Information 1 — List of measured specimens (used for linear measurements and/or geometric morphometric analyses). Abbreviations: MNHN, Muséum national d’Histoire naturelle in Paris (France), collections Zoologie et Anatomie comparée, Mammifères et Oiseaux; BMNH, Natural History Museum in London (UK); NBC, Naturalis Biodiversity Center in Leiden (Netherland); ROM, Royal Ontario Museum in Toronto (Canada); LSU, Louisiana State University in Bâton-Rouge (USA); AMNH, American Museum of Natural History in New York (USA); NMNH, National Museum of Natural History in Washington (USA); IEPA, Instituto de Pesquisas Científicas e Tecnológicas do Estado do Amapá in Macapá (Brazil); MHNG, Muséum d’Histoire naturelle in Geneva (Switzerland); KWATA, KWATA association in Cayenne (French Guiana); and PCDPC, Personal collection of Pierre Charles-Dominique in Montpellier (France). [file peerj-05-3650-s001.xlsx]

## Sheet: Feuil1
Institution	Museum-N°	Genus	species	Sexe	Stage	Distribution
AMNH	98812	Dasypus	kappleri	Male	Adult	Peru, Cusco, Canchis, Carachuma
AMNH	76933	Dasypus	kappleri	Female	Adult	Venezuela, Amazonas, Atabapo, Mount Duida, Tamatama
AMNH	136251	Dasypus	kappleri	Female	Adult	Colombia, Meta, Villavicencio
ROM	107299	Dasypus	kappleri	Male	Adult	Guyana, Potaro-Siparuni: Iwokrama Reserve, Burro Burro River, 25 km WNW of Kurupukari
ROM	108922	Dasypus	kappleri	Female	Adult	Guyana, Potaro-Siparuni: Turtle Mountain, 10 km NW of Kurupukari, Iwokrama Reserve
KWATA	DKA 05-98	Dasypus	kappleri	Unknown	Adult	French Guiana
USNM	388210	Dasypus	kappleri	Female	Adult	Venezuela, Amazonas, Rio Cunucunama
USNM	374825	Dasypus	kappleri	Unknown	Adult	Venezuela, Venezuela, Bolivar, El Dorado, 59 kms SSE from El Dorado
LSU	9271	Dasypus	kappleri	Unknown	Adult	Peru, Loreto Department, Rio Curanja
RMNH	20962	Dasypus	kappleri	Male	Adult	Suriname: Bitagron (ex-Witagron) = east bank of Coppename River
BMNH	14-4-25-87	Dasypus	kappleri	Male	Adult	Ecuador, Gualaquiza
BMNH	80-5-6-71	Dasypus	kappleri	Unknown	Adult	Ecuador
BMNH	67-4-29-1	Dasypus	kappleri	Unknown	Adult	Suriname, no more info
AMNH	32356	Dasypus	novemcinctus	Male	Adult	Colombia, Cauca Popayan, Cerro Munchique
AMNH	37356	Dasypus	novemcinctus	Unknown	Adult	Colombia, Cundinamarca, Anolaima
AMNH	133329	Dasypus	novemcinctus	Male	Adult	Brazil, Mato Grosso do Sul, Maracaju
AMNH	91707	Dasypus	novemcinctus	Male	Juvenile	Brazil, Amazonas, Borba, Madeira River, Auara lgarape
AMNH	14663	Dasypus	novemcinctus	Unknown	Adult	Colombia, Mgdalena, Santa marta, Bonda
AMNH	40984	Dasypus	novemcinctus	Male	Adult	Ecuador, El Oro, Portovelo
AMNH	133261	Dasypus	novemcinctus	Male	Juvenile	Brazil, Goias, Anapolis
AMNH	133338	Dasypus	novemcinctus	Male	Juvenile	Brazil, Para, Ilha de Marajo, Curralinho
AMNH	136252	Dasypus	novemcinctus	Male	Adult	Colombian, Meta, Villavicencio
AMNH	211668	Dasypus	novemcinctus	Female	Adult	Bolivia, Beni, Cercado, ca. 23 kilometers west of San Javier
AMNH	211665	Dasypus	novemcinctus	Male	Adult	Bolivia, Beni, Cercado, ca. 23 kilometers west of San Javier
AMNH	211672	Dasypus	novemcinctus	Male	Adult	Bolivia, Beni, Mamore, ca. 20 kilometers southwest of San Joaquin, Estancia Yotiole
AMNH	247661	Dasypus	novemcinctus	Male	Adult	Bolivia, Santa Cruz, Cordillera, 7 kilometers east and 3km north of Ingenia Mora
AMNH	262658	Dasypus	novemcinctus	Unknown	Adult	Bolivia, Pando, Nicolas Suarez, 5 kilometers upstream from Cachuela
AMNH	263287	Dasypus	novemcinctus	Male	Adult	Bolivia, Santa Cruz, Andres Ibanez, Ayacucho
AMNH	98515	Dasypus	novemcinctus	Unknown	Juvenile	Peru, Loreto, Maynas, Iquitos
AMNH	144828	Dasypus	novemcinctus	Unknown	Juvenile	Venezuela, Aragua, Girardot Rancho Grande
AMNH	133328	Dasypus	novemcinctus	Female	Juvenile	Brazil, Mato Grosso do Sul, Maracaju
AMNH	205726	Dasypus	novemcinctus	Male	Adult	Uruguay, Durazno, San Jorge, 15 kilometers north northwest of san Jorge, Negro river
AMNH	133265	Dasypus	novemcinctus	Female	Adult	Brazil, Goias, Anapolis
AMNH	93116	Dasypus	novemcinctus	Male	Adult	Brazil, Amazonas, Parintins, Villa Bella Imperatriz, Amazon
AMNH	133259	Dasypus	novemcinctus	Male	Juvenile	Brazil, Goias, Anapolis
AMNH	93735	Dasypus	novemcinctus	Male	Adult	Brazil, Amazonas, Parintins, Amazon River, south Bank
AMNH	365	Dasypus	novemcinctus	Unknown	Adult	Brazil, Mato Grosso, Chapada dos Guimares
AMNH	133330	Dasypus	novemcinctus	Female	Adult	Brazil, Mato Grosso do Sul, Maracaju
AMNH	133381	Dasypus	novemcinctus	Female	Juvenile	Brazil, Goias, Anapolis
AMNH	133341	Dasypus	novemcinctus	Male	Adult	Brazil, Ilha de Marajo, Curralinho
AMNH	93118	Dasypus	novemcinctus	Male	Juvenile	Brazil, Amazonas, Parintins, Villa Bella Imperatriz, Amazon
AMNH	133342	Dasypus	novemcinctus	Male	Adult	Brazil, Ilha de Marajo, Curralinho
AMNH	133266	Dasypus	novemcinctus	Male	Juvenile	Brazil, Goias, Anapolis
AMNH	133397	Dasypus	novemcinctus	Male	Adult	Brazil, Mato Grosso do Sul, Maracaju
AMNH	91710	Dasypus	novemcinctus	Male	Subadult	Brazil, Amazonas, Borba, Madeira River, Auara lgarape
AMNH	205727	Dasypus	novemcinctus	Female	Adult	Uruguay, Lavalleja, Zapican, 12 kilometers west southwest of Zapican
AMNH	262659	Dasypus	novemcinctus	Unknown	Subadult	Bolivia, Beni, Moxos, Trinidad
AMNH	33150	Dasypus	novemcinctus	Unknown	Adult	Colombia, Quindui, Salento
MHNG	616 093	Dasypus	novemcinctus	Unknown	Adult	Mexico
MHNG	838 081	Dasypus	novemcinctus	Unknown	Adult	Brazil:Rio Guanara
MHNG	964067	Dasypus	novemcinctus	Unknown	Adult	Brazil
MNHN	1995-953	Dasypus	novemcinctus	Male	Subadult	Guyane: Paracou, 12kms SSE du Sinnamary
MNHN	1996-587	Dasypus	novemcinctus	Unknown	Adult	Guyane: Barrage Petit Saut
MNHN	1999-1069	Dasypus	novemcinctus	Male	Adult	Guyane: Barrage Petit Saut
MNHN	2006-565	Dasypus	novemcinctus	Unknown	Adult	Para Brazil
MNHN	2007-371	Dasypus	novemcinctus	Unknown	Adult	Florida USA
MNHN	2007-372	Dasypus	novemcinctus	Unknown	Adult	Mexico
MNHN	2007-379	Dasypus	novemcinctus	Unknown	Adult	Texas USA
PCDPC	v3416	Dasypus	novemcinctus	Unknown	Adult	French Guiana
PCDPC	v3418	Dasypus	novemcinctus	Unknown	Adult	French Guiana
IEPA	AM 78	Dasypus	novemcinctus	Female	Adult	Brazil: Amapa: north (savanas)
IEPA	AP 207	Dasypus	novemcinctus	Male	Adult	Brazil: Amapa: north (savanas)
NBC	23948	Dasypus	novemcinctus	Male	Juvenile	Suriname: Matta west of Zanderij
NBC	18024	Dasypus	novemcinctus	Male	Adult	Suriname: Lucie River
NBC	20958	Dasypus	novemcinctus	Female	Adult	Suriname: Mapane Creek
LSU	8538	Dasypus	novemcinctus	Unknown	Adult	Mexico, Tbasco, 12 mi NW of Balancan
LSU	29160	Dasypus	novemcinctus	Unknown	Adult	USA, Mississipi, Hancock Co, 3 mi S Santa Rosa
LSU	15762	Dasypus	novemcinctus	Unknown	Adult	Costa Rica, Alajuela Province, Florencia de San Carlos
LSU	3244	Dasypus	novemcinctus	Unknown	Juvenile	Mexico San Luis Potosi, Xilitla
LSU	31174	Dasypus	novemcinctus	Unknown	Adult	USA, Louisiana, Avoyelles Parish, Lake Callahan, 1 mil DS of Cottonport City Hall
LSU	28347	Dasypus	novemcinctus	Unknown	Juvenile	Costa Rica, Puntarenas Province, Ojo del Agua, 10 km W Palmar Norte
LSU	7157	Dasypus	novemcinctus	Unknown	Adult	Belize, Cayo District, 1 mi S Augustine
LSU	12306	Dasypus	novemcinctus	Unknown	Adult	Peru, Loreto department, Rio Curanja, Balta
LSU	31175	Dasypus	novemcinctus	Unknown	Adult	USA, Louisiana, Cameron Parish, Johnson's Bayou
LSU	29187	Dasypus	novemcinctus	Unknown	Adult	USA, Mississipi, Hancock Co, 3 mi S Santa Rosa
LSU	15920	Dasypus	novemcinctus	Unknown	Juvenile	Argentina, Misiones Province, Colonia Elena
NMNH	281290	Dasypus	novemcinctus	Male	Adult	Colombia, La Guajira, Fonseca, Las Marimondas
NMNH	A22839	Dasypus	novemcinctus	Unknown	Adult	Honduras
NMNH	283467	Dasypus	novemcinctus	Male	Adult	Brazil, Minas Gerais
NMNH	171052	Dasypus	novemcinctus	Male	Subadut	Panama
NMNH	347565	Dasypus	novemcinctus	Male	Juvenile	United States
NMNH	339669	Dasypus	novemcinctus	Male	Adult	Tacatu (Takutu) River, Guyana
NMNH	565067	Dasypus	novemcinctus	Female	Adult	Guatemala
NMNH	568206	Dasypus	novemcinctus	Unknown	Adult	United States, Kansas, Cowley County
NMNH	033867	Dasypus	novemcinctus	Female	Adult	United States, Texas, Cameron County
NMNH	020920	Dasypus	novemcinctus	Unknown	Juvenile	Mexico, Morelos, Cuernavaca
NMNH	179172	Dasypus	novemcinctus	Unknown	Juvenile	Mexico
NMNH	244903	Dasypus	novemcinctus	Male	Adult	Guatemala
NMNH	406700	Dasypus	novemcinctus	Unknown	Adult	Venezuela
NMNH	337563	Dasypus	novemcinctus	Female	Adult	Nicaragua
ROM	32868	Dasypus	novemcinctus	Male	Adult	Guyana, Upper Takutu-Upper Essequibo: Dadanawa
ROM	31693	Dasypus	novemcinctus	Female	Adult	Guyana, Upper Takutu-Upper Essequibo: Nappi Creek, Foot of Kanuku Mountain, 25 mi E of Lethem, Rupununi
ROM	32275	Dasypus	novemcinctus	Male	Adult	Guyana, Upper Takutu-Upper Essequibo: Dadanawa
ROM	32261	Dasypus	novemcinctus	Guyana	Adult	Guyana, Upper Takutu-Upper Essequibo: Dadanawa
ROM	31996	Dasypus	novemcinctus	Female	Adult	Guyana, Upper Takutu-Upper Essequibo: 10 mi From Dadanawa, North on Lethem Road
BMNH	1-2-1-34	Dasypus	novemcinctus	Male	Adult	Bolivia, Bellavista
BMNH	3-7-7-150	Dasypus	novemcinctus	Unknown	Adult	Brazil, Chapada, Matto Grosso
BMNH	1-6-6-85	Dasypus	novemcinctus	Female	Adult	Brazil, Piquete, S.Paulo
BMNH	82-9-30-31	Dasypus	novemcinctus	Unknown	Adult	Brazil, R.G do Sol
BMNH	3-7-7-146	Dasypus	novemcinctus	Male	Adult	Brazil, Chapada, Matto grossa
BMNH	3-9-4-102	Dasypus	novemcinctus	Male	Adult	Brazil, Esperito Santo
BMNH	1-6-6-84	Dasypus	novemcinctus	Female	Adult	Brazil, Piquete, S.Paulo
BMNH	5-7-5-22	Dasypus	novemcinctus	Female	Adult	Venezuela
BMNH	28-10-11-54	Dasypus	novemcinctus	Male	Adult	Brazil, Sta Cathasina Handa
BMNH	11-10-27-3	Dasypus	novemcinctus	Unknown	Adult	Paraguay
BMNH	84-357	Dasypus	novemcinctus	Male	Adult	Brit.Honduras, Stann Creek Valley,
BMNH	65.5.18.2	Dasypus	novemcinctus	Unknown	Adult	Guatemala
BMNH	28-10-11-53	Dasypus	novemcinctus	Male	Adult	Brazil, Santa Egtherma
BMNH	3-9-4-101	Dasypus	novemcinctus	Male	Adult	Brazil, Esperito Santo
BMNH	82-7-26-12	Dasypus	novemcinctus	Female	Adult	Mexico, Presidio, Mazatlan
BMNH	82-9-30-32	Dasypus	novemcinctus	Unknown	Adult	Brazil, Taquara
BMNH	93-1-1-17	Dasypus	novemcinctus	Unknown	Adult	Unknown
BMNH	98-3-2-153	Dasypus	novemcinctus	Male	Adult	Mexico, Rosario, Sinaloa
BMNH	14-4-25-86	Dasypus	novemcinctus	Male	Adult	Ecuador, Gualaquiza
BMNH	98-10-3-23	Dasypus	novemcinctus	Female	Adult	Colombia
BMNH	521183	Dasypus	novemcinctus	Female	Adult	Suriname, Zanderiyi
BMNH	26-1-12-21	Dasypus	novemcinctus	Female	Adult	Bolivia, Buenavista
BMNH	v5-7-5-21	Dasypus	novemcinctus	Male	Adult	Venezuela, Merida
BMNH	98-10-3-22	Dasypus	novemcinctus	Unknown	Adult	Colombia
AMNH	205706	Dasypus	hybridus	Female	Adult	Uruguay, Lavalleja, Zapican, 12 kilometers west southwest of Zapican
AMNH	205721	Dasypus	hybridus	Male	Adult	Uruguay, treinta y Tres, 16 kilometers south southwest of Tacuari River mouth
AMNH	205693	Dasypus	hybridus	Female	Adult	Uruguay, Artigas, 6 km north northwest of Belen
USNM	096511	Dasypus	hybridus	Unknown	Adult	Argentina
BMNH	3-9-5-155	Dasypus	septemcinctus	Unknown	Subadult	Unknown
BMNH	86-10-4-7	Dasypus	septemcinctus	Unknown	Adult	Brazil?, Rio Granti
BMNH	3-7-7-152	Dasypus	septemcinctus	Female	Adult	Brazil, Chapada, matto grossa
LSU	19240	Dasypus	pilosus	Unknown	Adult	Peru, Hanuco Department, Bosque Taprag above Acomayo
BMNH	94-10-1-13	Dasypus	pilosus	Female	Adult	Mataynor
