# Supplementary material for: Beyond the carapace: skull shape variation and morphological systematics of long-nosed armadillos (genus Dasypus)
Source: PeerJ. 2017 Aug 15;5:e3650. doi: 10.7717/peerj.3650 (PMC5562145; doi:10.7717/peerj.3650)
Supplement: Supplemental Information 11 — Procrustres coordinates of crania used in the intraspecific comparisons (Dasypus novemcinctus). [file peerj-05-3650-s011.xlsx]

## Sheet: Feuil1
.	1	1	1	2	2	2	3	3	3	4	4	4	5	5	5	6	6	6	7	7	7	8	8	8	9	9	9	10	10	10	11	11	11	12	12	12	13	13	13	14	14	14	15	15	15	16	16	16	17
Dasypus nov 32356	0.266561359167099	0.00310194562189281	0.01469547487795353	0.13240276277065277	3.028757928404957E-4	0.03604772686958313	-0.043780963867902756	1.1018156510544941E-4	0.07352956384420395	-0.11571099609136581	5.477510276250541E-4	0.0570455826818943	-0.1358880251646042	-0.0011937204981222749	0.026297980919480324	0.1304287314414978	-0.009863466955721378	0.03390510380268097	0.12893112003803253	0.011197324842214584	0.03490245342254639	-0.007521040737628937	-0.05219119042158127	0.039726387709379196	-0.007790116593241692	0.05023227632045746	0.03957846760749817	-0.13536618649959564	-0.027411283925175667	0.037885963916778564	-0.13558925688266754	0.025379855185747147	0.03866827115416527	0.24480976164340973	-0.01483140978962183	0.011927478946745396	0.22614772617816925	-0.013273204676806927	0.0138555271551013	0.07020428031682968	-0.05468880012631416	0.033092331141233444	0.03579866886138916	-0.072659932076931	0.024750176817178726	-0.005133541766554117	-0.04478839039802551	0.008269538171589375	-0.014177954755723476
Dasypus nov 37356	0.2542237937450409	0.00260340329259634	0.022500643506646156	0.13401739299297333	5.823133978992701E-4	0.030898725613951683	-0.04017099365592003	-7.330335793085396E-4	0.07696559280157089	-0.11016300320625305	5.745849921368062E-4	0.06652966141700745	-0.13063636422157288	-0.0011461084941402078	0.03534329682588577	0.12691523134708405	-0.009391491301357746	0.030234521254897118	0.12752774357795715	0.012965670786798	0.03104211762547493	-0.004118179902434349	-0.05092897266149521	0.044062595814466476	-0.00404388876631856	0.04979192465543747	0.042821403592824936	-0.13091735541820526	-0.02725060097873211	0.04647903889417648	-0.1330304890871048	0.024611933156847954	0.04599649831652641	0.2368689477443695	-0.01628848910331726	0.015676600858569145	0.21705415844917297	-0.01717332936823368	0.015296629630029202	0.06694552302360535	-0.05380890145897865	0.03251669928431511	0.03152962401509285	-0.07104744762182236	0.025973409414291382	-0.007314404472708702	-0.04318126663565636	0.01354430802166462	-0.012911003082990646
Dasypus nov 133329	0.26498299837112427	1.8228558474220335E-4	0.019325874745845795	0.13795393705368042	6.015048129484057E-4	0.03731932118535042	-0.03979089856147766	-2.0377259352244437E-4	0.06898120045661926	-0.11375325173139572	-0.001877366565167904	0.05225146934390068	-0.1342199593782425	-0.003036926267668605	0.02409525215625763	0.13165532052516937	-0.012529836967587471	0.037641771137714386	0.13082198798656464	0.014230333268642426	0.037510234862565994	-0.0014648041687905788	-0.0433935672044754	0.043466050177812576	-0.0028538908809423447	0.04299050197005272	0.04441896826028824	-0.13858410716056824	-0.02486947365105152	0.03340234234929085	-0.13757100701332092	0.022915327921509743	0.03460577502846718	0.24630317091941833	-0.0171233881264925	0.013873817399144173	0.21805624663829803	-0.01594230905175209	0.01658288575708866	0.0752130001783371	-0.05411117523908615	0.028291458263993263	0.036630112677812576	-0.06770917028188705	0.01737917773425579	-0.003064008429646492	-0.034935761243104935	-0.0033397602383047342	-0.011715220287442207
Dasypus nov 14663	0.2721366286277771	-0.0015825012233108282	0.017883071675896645	0.13230673968791962	-3.431447839830071E-4	0.03390217572450638	-0.043652091175317764	0.0010501393117010593	0.07378937304019928	-0.11226429790258408	-8.478945819661021E-4	0.06024150550365448	-0.12943965196609497	-0.0022633345797657967	0.029318036511540413	0.12554679811000824	-0.010496559552848339	0.03468095883727074	0.12612323462963104	0.012499899603426456	0.03520442172884941	-0.004820468835532665	-0.04594201594591141	0.04490644484758377	-0.006915682461112738	0.04449699819087982	0.043111298233270645	-0.1339012235403061	-0.023311810567975044	0.041944120079278946	-0.13358721137046814	0.021568499505519867	0.04224946349859238	0.2519157826900482	-0.01774890534579754	0.010033291764557362	0.21996599435806274	-0.015014826320111752	0.009639977477490902	0.06735794991254807	-0.05453495308756828	0.03023056499660015	0.025379987433552742	-0.06625927984714508	0.025911664590239525	-0.004767933394759893	-0.03767992556095123	0.006961598061025143	-0.017038099467754364
Dasypus nov 40984	0.26613909006118774	1.0050799755845219E-4	0.01964316889643669	0.12959636747837067	0.0012708244612440467	0.03443748131394386	-0.035864073783159256	8.889195305528119E-5	0.0704549252986908	-0.10475797951221466	-3.173522127326578E-4	0.0661487877368927	-0.12900812923908234	-0.0011640614829957485	0.02684641070663929	0.12435908615589142	-0.011931548826396465	0.034483809024095535	0.12626862525939941	0.013563656248152256	0.03409324213862419	-0.01743423007428646	-0.04833616316318512	0.04117870330810547	-0.013505951501429081	0.048129934817552567	0.039098650217056274	-0.12697649002075195	-0.024239197373390198	0.046800531446933746	-0.12784402072429657	0.021992003545165062	0.04690095782279968	0.2463850975036621	-0.01748226210474968	0.01658007875084877	0.2263174057006836	-0.015817297622561455	0.017262868583202362	0.07298414409160614	-0.05349303409457207	0.031528227031230927	0.03250101953744888	-0.07353438436985016	0.021638579666614532	-0.0025584895629435778	-0.04444858431816101	0.008589129894971848	-0.018451092764735222
Dasypus nov 136252	0.2556867301464081	2.0401221991050988E-4	0.027188200503587723	0.141520693898201	8.349572890438139E-4	0.03302838280797005	-0.03778974711894989	-4.970916197635233E-4	0.06651788204908371	-0.10317888855934143	-4.199669638182968E-4	0.057983070611953735	-0.12657533586025238	-6.596846505999565E-4	0.022607384249567986	0.14453840255737305	-0.009806178510189056	0.030527444556355476	0.14469866454601288	0.011999598704278469	0.030468348413705826	-0.0030302833765745163	-0.04442179948091507	0.03928598016500473	-0.00153807969763875	0.04363387078046799	0.03631598502397537	-0.12912574410438538	-0.028970927000045776	0.04268811270594597	-0.12911084294319153	0.026520047336816788	0.041865024715662	0.24087047576904297	-0.017089609056711197	0.01860784739255905	0.2269764542579651	-0.015188383869826794	0.020122725516557693	0.07232655584812164	-0.04962296411395073	0.027581822127103806	0.0367610901594162	-0.06603696942329407	0.020359033718705177	-0.003664392279461026	-0.039145249873399734	0.0018026126781478524	-0.013758626766502857
Dasypus nov 211668	0.2599262297153473	7.214638753794134E-5	0.02403450943529606	0.126844123005867	3.845220780931413E-4	0.04364519938826561	-0.03561966493725777	3.0114472610875964E-4	0.07423293590545654	-0.10916604101657867	-0.003255670890212059	0.06418141722679138	-0.12814943492412567	-0.001580379786901176	0.02122902125120163	0.12958838045597076	-0.016359152272343636	0.04028359428048134	0.12744984030723572	0.01770382560789585	0.040184978395700455	-7.804724154993892E-4	-0.04976104572415352	0.04176612198352814	0.001470958930440247	0.048299144953489304	0.0401674248278141	-0.13240274786949158	-0.026840267702937126	0.04457579180598259	-0.13295313715934753	0.02255287952721119	0.04503835365176201	0.24006430804729462	-0.018629955127835274	0.01669067144393921	0.21902303397655487	-0.017652815207839012	0.018256688490509987	0.07359237223863602	-0.05708008259534836	0.029337821528315544	0.037114497274160385	-0.07300243526697159	0.01781749166548252	0.0038261141162365675	-0.03974701464176178	0.009918278083205223	-0.01544835977256298
Dasypus nov 211665	0.2561890184879303	0.0015467674238607287	0.019928261637687683	0.13772469758987427	-8.500219555571675E-4	0.03509947657585144	-0.042616114020347595	5.74126373976469E-4	0.06445407122373581	-0.10754652321338654	4.574047343339771E-4	0.05252143740653992	-0.127936452627182	-0.0013702568830922246	0.02340172789990902	0.13240016996860504	-0.01146277878433466	0.0349094457924366	0.13574084639549255	0.010512533597648144	0.03525245189666748	-0.004933581687510014	-0.04366062209010124	0.04282762110233307	-0.004061583429574966	0.04254138842225075	0.043968163430690765	-0.12847988307476044	-0.024130307137966156	0.03891589120030403	-0.1284002810716629	0.023538431152701378	0.03850569576025009	0.23978930711746216	-0.015738293528556824	0.01431326661258936	0.21842727065086365	-0.01558490376919508	0.015776967629790306	0.08954190462827682	-0.042699769139289856	0.03289148584008217	0.041378095746040344	-0.0648706704378128	0.01987265795469284	-8.687921945238486E-5	-0.03916412964463234	0.005735302809625864	-0.015937665477395058
Dasypus nov 247661	0.2491348832845688	0.0013422996271401644	0.024570418521761894	0.1494845598936081	-7.640740659553558E-5	0.034043099731206894	-0.031224239617586136	-0.0025071485433727503	0.07013970613479614	-0.10307911783456802	-6.337478989735246E-4	0.05817781761288643	-0.12970437109470367	-0.0010359911248087883	0.02473522163927555	0.14620286226272583	-0.011175193823873997	0.03271191939711571	0.14546312391757965	0.011743382550776005	0.03247999772429466	0.002895691664889455	-0.046785756945610046	0.038167621940374374	0.004427835810929537	0.04460272192955017	0.0404052771627903	-0.13044755160808563	-0.027165856212377548	0.04205286502838135	-0.13129447400569916	0.02577233873307705	0.04329869896173477	0.2378828227519989	-0.01640712469816208	0.01919189654290676	0.2173192799091339	-0.015212133526802063	0.02060236968100071	0.07998891919851303	-0.05252264067530632	0.02844756282866001	0.046246275305747986	-0.06656806915998459	0.01641533151268959	0.005852886941283941	-0.03993900120258331	0.005053885281085968	-0.0172891803085804
Dasypus nov 262658	0.2533998191356659	0.0010042320936918259	0.028349682688713074	0.1455952227115631	0.0023421160876750946	0.0350063182413578	-0.03598976880311966	0.0011934010544791818	0.07311718910932541	-0.10039190202951431	-2.5006389478221536E-4	0.06116561219096184	-0.1270398646593094	-0.002500125439837575	0.014042321592569351	0.14523619413375854	-0.013908034190535545	0.03178483247756958	0.1423742175102234	0.015469874255359173	0.032406073063611984	6.103611085563898E-4	-0.048064377158880234	0.04115235060453415	-6.539438618347049E-4	0.04754721000790596	0.04235796630382538	-0.12934033572673798	-0.028701389208436012	0.03861328586935997	-0.12881243228912354	0.024578282609581947	0.042553551495075226	0.23333169519901276	-0.017092054709792137	0.02057711035013199	0.2202175259590149	-0.016024623066186905	0.021652553230524063	0.0802648514509201	-0.05304890125989914	0.030741961672902107	0.03951408341526985	-0.07066036760807037	0.018487080931663513	5.572054760705214E-6	-0.04169636219739914	0.004412346053868532	-0.01689901016652584
Dasypus nov 263287	0.259631872177124	0.0013786840718239546	0.01796531304717064	0.14458665251731873	9.245918481610715E-4	0.031276073306798935	-0.04078176990151405	-5.917339003644884E-4	0.06693194806575775	-0.10965176671743393	-0.00188236974645406	0.05360231176018715	-0.13027480244636536	-0.0017320518381893635	0.02253427542746067	0.14386606216430664	-0.011380319483578205	0.028592070564627647	0.14225520193576813	0.012109590694308281	0.029401211068034172	-0.002541983500123024	-0.04364951327443123	0.0437106229364872	-0.002182232914492488	0.0432702861726284	0.04265071079134941	-0.1306605190038681	-0.025353606790304184	0.03657849133014679	-0.13142423331737518	0.02299661375582218	0.0376451313495636	0.24369068443775177	-0.015453554689884186	0.012433034367859364	0.22679588198661804	-0.014279255643486977	0.014318869449198246	0.08243602514266968	-0.04102185368537903	0.034903548657894135	0.03290867060422897	-0.06419286876916885	0.02600281499326229	0.0013237377861514688	-0.04160809889435768	0.009300651960074902	-0.015205093659460545
Dasypus nov 205726	0.2671279311180115	0.002261617686599493	0.023269420489668846	0.1316944658756256	-6.237119087018073E-4	0.036088138818740845	-0.0422130711376667	-0.0010720202699303627	0.06599286943674088	-0.10833921283483505	-2.329817070858553E-4	0.05976991355419159	-0.13144275546073914	-0.0015742533141747117	0.02572467178106308	0.1311006098985672	-0.011335526593029499	0.033912722021341324	0.13052202761173248	0.011503809131681919	0.033960241824388504	4.0134298615157604E-4	-0.043725986033678055	0.03380098566412926	1.5628748224116862E-4	0.043246787041425705	0.036765988916158676	-0.13004238903522491	-0.02754763327538967	0.040095292031764984	-0.13074429333209991	0.025801924988627434	0.04098167642951012	0.2475799322128296	-0.01614435203373432	0.01660827547311783	0.22742313146591187	-0.01408747024834156	0.018786000087857246	0.07837379723787308	-0.04361451044678688	0.03310627490282059	0.03713972866535187	-0.06176111847162247	0.01852688565850258	7.964597316458821E-4	-0.03712128847837448	0.00635509705170989	-0.013956226408481598
Dasypus nov 133265	0.25951796770095825	7.56940571591258E-4	0.017487740144133568	0.13242997229099274	9.77713498286903E-4	0.03615076467394829	-0.03443024680018425	9.58916571107693E-5	0.06987358629703522	-0.11292366683483124	-2.2071058629080653E-4	0.05715099349617958	-0.13345183432102203	-0.0013280914863571525	0.03359205648303032	0.12331836670637131	-0.006667644716799259	0.03749934211373329	0.12422122061252594	0.009324204176664352	0.03748630732297897	0.002184267621487379	-0.04941998049616814	0.03863482549786568	-5.590933142229915E-4	0.04860834777355194	0.038349974900484085	-0.13200925290584564	-0.025646671652793884	0.03715638816356659	-0.131108820438385	0.024601254612207413	0.03786247596144676	0.24435417354106903	-0.01685115322470665	0.0146569749340415	0.22703534364700317	-0.014942971058189869	0.016457101330161095	0.07412026077508926	-0.05024373158812523	0.029483817517757416	0.03644213825464249	-0.06721070408821106	0.019553083926439285	4.5102433068677783E-4	-0.040070272982120514	0.006564940791577101	-0.013860387727618217
Dasypus nov 93116	0.2585676610469818	0.0014108135364949703	0.025070354342460632	0.13714885711669922	6.049154326319695E-4	0.034108877182006836	-0.03795768320560455	-0.0024320108350366354	0.06759629398584366	-0.10635654628276825	-0.0012744817649945617	0.05932968854904175	-0.13070239126682281	-0.0029155798256397247	0.022982150316238403	0.13868023455142975	-0.013110756874084473	0.03072715736925602	0.13821683824062347	0.015149734914302826	0.031068308278918266	3.3505025203339756E-4	-0.047791242599487305	0.043344005942344666	-0.003484914544969797	0.04722130298614502	0.04044130817055702	-0.1299292892217636	-0.026815690100193024	0.0405014343559742	-0.13076475262641907	0.022399671375751495	0.04326724261045456	0.23995397984981537	-0.016137896105647087	0.019940342754125595	0.2250392735004425	-0.015819324180483818	0.02027365192770958	0.07726090401411057	-0.047813549637794495	0.033771853893995285	0.03715915232896805	-0.0634249746799469	0.0202559232711792	-0.0014631260419264436	-0.038294173777103424	0.008491450920701027	-0.015520252287387848
Dasypus nov 93735	0.2614961564540863	0.0012804080033674836	0.01644727773964405	0.14349378645420074	3.340740513522178E-4	0.03019002079963684	-0.04144658148288727	-6.534669082611799E-4	0.06956551223993301	-0.11518239229917526	-0.0015321308746933937	0.05110675469040871	-0.13540764153003693	-0.0027730739675462246	0.01563928835093975	0.13815365731716156	-0.008442419581115246	0.02993469499051571	0.1372348815202713	0.008533895947039127	0.030507225543260574	-0.003806398017331958	-0.047047097235918045	0.04113440588116646	-0.0075552091002464294	0.04630003497004509	0.041269078850746155	-0.1392286866903305	-0.0258579533547163	0.030064033344388008	-0.1364312767982483	0.0241769440472126	0.031420085579156876	0.24442090094089508	-0.015459912829101086	0.0105688301846385	0.22807231545448303	-0.01310837920755148	0.014831339940428734	0.075005441904068	-0.044098831713199615	0.03412606939673424	0.03423431143164635	-0.06586997210979462	0.02286899834871292	-0.003706004936248064	-0.03929884731769562	0.00814151018857956	-0.015515417791903019
Dasypus nov 365	0.2600002884864807	-1.6019187751226127E-4	0.02204204723238945	0.1433645486831665	-3.01154243061319E-4	0.03496928513050079	-0.03758658096194267	-0.0013778571737930179	0.06532785296440125	-0.1026586964726448	-7.986442069523036E-4	0.055110421031713486	-0.12623025476932526	-0.0028937398456037045	0.020443616434931755	0.13928602635860443	-0.012493440881371498	0.03367478772997856	0.13937707245349884	0.01372929010540247	0.030851289629936218	-0.0035009419079869986	-0.04656282439827919	0.03755541890859604	-0.002793755615130067	0.046312544494867325	0.0394839383661747	-0.12445942312479019	-0.02635229006409645	0.03870493546128273	-0.12640611827373505	0.02405770681798458	0.037617478519678116	0.23876021802425385	-0.01772703230381012	0.01740170456469059	0.2259240597486496	-0.01740093156695366	0.018549855798482895	0.07362425327301025	-0.05402790755033493	0.03214912489056587	0.036487825214862823	-0.07134172320365906	0.02062087506055832	8.729383116587996E-4	-0.038580600172281265	0.0052817389369010925	-0.01194971613585949
Dasypus nov 133330	0.2592483162879944	0.0025006565265357494	0.01884721778333187	0.14456318318843842	-2.3171842622105032E-4	0.033299822360277176	-0.04117420315742493	9.24300285987556E-4	0.06762572377920151	-0.11414361000061035	-0.002365976572036743	0.054346777498722076	-0.1306849718093872	-5.267848027870059E-4	0.01842270791530609	0.1431221067905426	-0.01265653409063816	0.03138459473848343	0.1405753195285797	0.013801859691739082	0.03173787519335747	-1.3294945529196411E-4	-0.04601899906992912	0.03968276455998421	-0.003247691784054041	0.04407227411866188	0.04282762482762337	-0.13489526510238647	-0.024705009534955025	0.03477655351161957	-0.1351163238286972	0.022166727110743523	0.03567999601364136	0.24292582273483276	-0.014008275233209133	0.015733633190393448	0.22711236774921417	-0.014289510436356068	0.016432007774710655	0.0782657042145729	-0.04764225333929062	0.03168807923793793	0.0354984775185585	-0.06548700481653214	0.020162250846624374	-7.226724992506206E-4	-0.04026840254664421	0.006507656536996365	-0.012521323747932911
Dasypus nov 133341	0.26267412304878235	0.0018553448608145118	0.025433780625462532	0.14703141152858734	2.7511053485795856E-4	0.03400138393044472	-0.03679190203547478	-0.0022330654319375753	0.07058215886354446	-0.11106934398412704	-0.0016201491234824061	0.05827922001481056	-0.13261350989341736	-9.934796253219247E-5	0.024350203573703766	0.1388022005558014	-0.013608461245894432	0.030419887974858284	0.13852322101593018	0.0131340641528368	0.03321608528494835	-0.0015292217722162604	-0.04560059681534767	0.042692769318819046	-2.408056752756238E-4	0.04440038651227951	0.039682403206825256	-0.13388197124004364	-0.022314436733722687	0.043622586876153946	-0.13345713913440704	0.020282501354813576	0.04476593807339668	0.24256564676761627	-0.013797236606478691	0.018581867218017578	0.22505123913288116	-0.013578920625150204	0.019753361120820045	0.07560374587774277	-0.05219842121005058	0.023559315130114555	0.03941341117024422	-0.06521144509315491	0.02260424755513668	0.004127789288759232	-0.037770502269268036	0.007483572233468294	-0.011403553187847137
Dasypus nov 133342	0.2591090798377991	0.0022862388286739588	0.02487100288271904	0.1389380246400833	4.867302413913421E-5	0.035876452922821045	-0.038556817919015884	-6.512559484690428E-4	0.06928638368844986	-0.11184628307819366	-0.003249700181186199	0.058272089809179306	-0.13231386244297028	-4.250469501130283E-4	0.019847959280014038	0.14279504120349884	-0.015754051506519318	0.030298616737127304	0.14106525480747223	0.01400869432836771	0.03300986811518669	0.00280147441662848	-0.045964315533638	0.04221053421497345	-5.701998015865684E-4	0.044760871678590775	0.03920675441622734	-0.1305849701166153	-0.024781327694654465	0.041521184146404266	-0.13006094098091125	0.021802274510264397	0.043360862880945206	0.23974446952342987	-0.015624302439391613	0.019131839275360107	0.22477853298187256	-0.014907052740454674	0.0192133616656065	0.0800122395157814	-0.046940043568611145	0.03056473284959793	0.04132724925875664	-0.06459192931652069	0.02247174270451069	3.3305195393040776E-4	-0.039412982761859894	0.0040794420056045055	-0.014629464596509933
Dasypus nov 133397	0.26355674862861633	0.0013977870112285018	0.01798664592206478	0.13229601085186005	0.0010692966170608997	0.03720137104392052	-0.0409131795167923	6.847274489700794E-4	0.06603287905454636	-0.10949569940567017	-9.423378651263192E-5	0.05857956036925316	-0.1287599802017212	-2.2821934544481337E-4	0.02355482429265976	0.1259891539812088	-0.011612271890044212	0.03740761801600456	0.12876398861408234	0.012646100483834743	0.03663856163620949	-0.001259457552805543	-0.04313155636191368	0.04210858792066574	-0.002281048335134983	0.04241623729467392	0.04321953281760216	-0.1311037391424179	-0.02557716891169548	0.039878688752651215	-0.13084402680397034	0.02432037703692913	0.04070253670215607	0.2473035454750061	-0.014570722356438637	0.014214036986231804	0.22301985323429108	-0.012741469778120518	0.01779300905764103	0.07889820635318756	-0.046063441783189774	0.03534374013543129	0.038093265146017075	-0.06740254163742065	0.019365066662430763	-0.0014099376276135445	-0.03836891055107117	0.0048399027436971664	-0.014122884720563889
Dasypus nov 91710	0.2609843313694	0.0036558436695486307	0.027631476521492004	0.14019471406936646	-5.824352847412229E-4	0.03368709236383438	-0.035657528787851334	-3.023526514880359E-4	0.06543650478124619	-0.10322324186563492	6.746836588717997E-4	0.057628437876701355	-0.1272502839565277	-0.0012805706355720758	0.02533140778541565	0.13287843763828278	-0.009969416074454784	0.03273138031363487	0.13357502222061157	0.010428644716739655	0.03306467458605766	-0.0019130748696625233	-0.04943167418241501	0.03683362901210785	-0.001965760486200452	0.05035695061087608	0.03838407248258591	-0.12863688170909882	-0.026392081752419472	0.04104679450392723	-0.12851779162883759	0.0245588980615139	0.04150661826133728	0.2406323105096817	-0.013309360481798649	0.020725663751363754	0.2275606244802475	-0.012729006819427013	0.021692568436264992	0.07102852314710617	-0.05609731376171112	0.027504434809088707	0.03205243870615959	-0.0723998099565506	0.01634419709444046	-0.002423665253445506	-0.043014656752347946	0.0035969202872365713	-0.01578468829393387
Dasypus nov 205727	0.2695443332195282	-2.3962961859069765E-4	0.019906485453248024	0.1371850073337555	-3.2586915767751634E-4	0.032659661024808884	-0.04628869146108627	-9.258100180886686E-4	0.06450708210468292	-0.1078834980726242	-0.0017074092756956816	0.05281175300478935	-0.13008034229278564	-0.0016434156568720937	0.017002280801534653	0.13636751472949982	-0.010412849485874176	0.03073298931121826	0.13580679893493652	0.0103299580514431	0.03109753131866455	-0.0060785203240811825	-0.043879833072423935	0.03968176245689392	-0.009617181494832039	0.043289486318826675	0.039641112089157104	-0.1294083297252655	-0.026266617700457573	0.03487115725874901	-0.1299893856048584	0.022672951221466064	0.0350428931415081	0.2524404525756836	-0.016399266198277473	0.01544930785894394	0.23226216435432434	-0.014840660616755486	0.01640835404396057	0.07664027065038681	-0.04654631391167641	0.030961396172642708	0.029822546988725662	-0.06622126698493958	0.018307097256183624	-0.003012656234204769	-0.039255376905202866	0.0049897716380655766	-0.017978724092245102
Dasypus nov 262659	0.25340116024017334	8.777868351899087E-4	0.026732128113508224	0.1461963951587677	-7.59011716581881E-4	0.03477821126580238	-0.035592757165431976	0.0012823935830965638	0.07227374613285065	-0.10928403586149216	2.4111107632052153E-4	0.06130010262131691	-0.13030755519866943	-0.002551835961639881	0.03340340405702591	0.13857713341712952	-0.0114667396992445	0.0342775322496891	0.13924625515937805	0.011429250240325928	0.03470776602625847	0.0035150786861777306	-0.048387687653303146	0.03920939192175865	8.823897805996239E-4	0.04788249731063843	0.03927173092961311	-0.1278267800807953	-0.028098000213503838	0.04128482937812805	-0.12922696769237518	0.026964634656906128	0.04290786758065224	0.2351110875606537	-0.016251567751169205	0.01940889097750187	0.2210806906223297	-0.015119178220629692	0.02088744007050991	0.07528707385063171	-0.05376662686467171	0.033053506165742874	0.03922179713845253	-0.0706835389137268	0.019335981458425522	0.004791402257978916	-0.03879585862159729	0.004091797862201929	-0.01104809995740652
Dasypus nov 616093	0.2602798342704773	0.001486685243435204	0.018922606483101845	0.13416750729084015	0.0022402203176170588	0.03813312202692032	-0.04334423318505287	-1.9083090592175722E-4	0.07067186385393143	-0.10258471965789795	-0.0022856998257339	0.05918550863862038	-0.12919014692306519	-9.903116151690483E-4	0.02528432384133339	0.13543494045734406	-0.009792941622436047	0.03585609048604965	0.13633400201797485	0.013638850301504135	0.03426988795399666	-0.01826811209321022	-0.04887070879340172	0.03918520361185074	-0.015613637864589691	0.048405274748802185	0.039608508348464966	-0.12587004899978638	-0.0233419518917799	0.04536696895956993	-0.12573733925819397	0.02329944632947445	0.04620426520705223	0.2444443702697754	-0.019146228209137917	0.012874876148998737	0.22105732560157776	-0.015645386651158333	0.01294910628348589	0.07271181046962738	-0.05459503456950188	0.03439629077911377	0.03593277931213379	-0.07327532023191452	0.020357612520456314	-0.0019540328066796064	-0.040107592940330505	0.0061179581098258495	-0.017716027796268463
Dasypus nov 838081	0.2556990683078766	6.02780026383698E-4	0.023404957726597786	0.13832564651966095	3.1519521144218743E-4	0.039464838802814484	-0.03670908883213997	4.3691536120604724E-5	0.06454489380121231	-0.10474568605422974	-9.577585151419044E-4	0.060315851122140884	-0.12524141371250153	-0.001158377737738192	0.022509930655360222	0.14010684192180634	-0.01280394196510315	0.0351598896086216	0.14000901579856873	0.014140250161290169	0.034849390387535095	-0.004676756449043751	-0.04456783086061478	0.03681815788149834	-0.006556401494890451	0.04244142025709152	0.038283735513687134	-0.12764009833335876	-0.02868776023387909	0.03833812102675438	-0.1284092515707016	0.025136077776551247	0.04143388196825981	0.23829837143421173	-0.017669610679149628	0.016739772632718086	0.22399063408374786	-0.017331672832369804	0.018506517633795738	0.07604633271694183	-0.053447175770998	0.027127526700496674	0.03987292945384979	-0.06858909130096436	0.019117657095193863	0.006008314900100231	-0.038918815553188324	0.006458489689975977	-0.01278872974216938
Dasypus nov 964067	0.2622615694999695	0.0018271973822265863	0.02541213482618332	0.12475795298814774	0.0019202344119548798	0.037460628896951675	-0.03619813174009323	-4.2374813347123563E-4	0.06571470201015472	-0.10468439012765884	-1.6621587565168738E-4	0.06332255154848099	-0.1286902278661728	0.0017544134752824903	0.029947804287075996	0.12083856761455536	-0.013281706720590591	0.0368192233145237	0.12186556309461594	0.017106231302022934	0.03635828569531441	-0.0038978944066911936	-0.04690337926149368	0.04092678055167198	-0.0040572769939899445	0.045160166919231415	0.039325300604104996	-0.12943421304225922	-0.024459058418869972	0.046031538397073746	-0.1263725459575653	0.024465151131153107	0.046773944050073624	0.2441379427909851	-0.015903111547231674	0.018534168601036072	0.2212180197238922	-0.013631213456392288	0.018864329904317856	0.07504872232675552	-0.05617908015847206	0.024859324097633362	0.04449489712715149	-0.07107227295637131	0.015188340097665787	0.0018573839915916324	-0.04176487773656845	0.004749454092234373	-0.013179567642509937
Dasypus nov 1995-953	0.2633749842643738	0.0021680546924471855	0.0194752998650074	0.12743084132671356	8.538896217942238E-4	0.03309803828597069	-0.0367172546684742	-9.883864549919963E-4	0.07179728150367737	-0.10868658870458603	1.3704215234611183E-4	0.05653780698776245	-0.12706738710403442	2.0346997189335525E-4	0.041634462773799896	0.1230357363820076	-0.008333813399076462	0.034205760806798935	0.12437121570110321	0.00968497060239315	0.03372432664036751	-0.013572102412581444	-0.04927646368741989	0.039537232369184494	-0.015818525105714798	0.047851793467998505	0.040738314390182495	-0.1321539431810379	-0.025359414517879486	0.03893698379397392	-0.1310877799987793	0.023298904299736023	0.04111122712492943	0.24447676539421082	-0.01474840473383665	0.01650136522948742	0.22458885610103607	-0.014698139391839504	0.014602430164813995	0.07303380966186523	-0.05117643252015114	0.0308513306081295	0.03151104226708412	-0.06859186291694641	0.0240731593221426	0.0010911221615970135	-0.04411393776535988	0.006965395994484425	-0.015326331369578838
Dasypus nov 1996-587	0.26123523712158203	0.002560736145824194	0.024677276611328125	0.11778055876493454	-5.286104860715568E-4	0.04301632568240166	-0.044763509184122086	-9.98453819192946E-4	0.0772651731967926	-0.11396324634552002	-0.0016414609272032976	0.0609407015144825	-0.12698699533939362	-9.168542455881834E-4	0.04945667088031769	0.12719419598579407	-0.010148704051971436	0.037045303732156754	0.12299296259880066	0.011936251074075699	0.03832901269197464	-0.013837970793247223	-0.05088093504309654	0.038255348801612854	-0.015122602693736553	0.050224315375089645	0.03839052841067314	-0.13555754721164703	-0.028661277145147324	0.03975674510002136	-0.13528820872306824	0.027479857206344604	0.04023703932762146	0.24590438604354858	-0.017880070954561234	0.016621148213744164	0.22623056173324585	-0.016378946602344513	0.016527827829122543	0.0750390887260437	-0.05428895354270935	0.029480936005711555	0.034899428486824036	-0.07380849868059158	0.019782833755016327	-3.295870192232542E-5	-0.04350772872567177	0.009578350000083447	-0.012453625909984112
Dasypus nov 1999-1069	0.26265695691108704	0.0013947959523648024	0.02363697811961174	0.11786650866270065	-4.4977740617468953E-4	0.04030889272689819	-0.0396115705370903	-0.0024168197996914387	0.07378796488046646	-0.10684339702129364	-7.31476116925478E-4	0.06178945675492287	-0.12703551352024078	2.902359119616449E-5	0.03535653278231621	0.12046748399734497	-0.01242799498140812	0.03788226470351219	0.12189339846372604	0.012223806232213974	0.03818698599934578	-0.01039864495396614	-0.051557719707489014	0.03826982155442238	-0.011450771242380142	0.05128544196486473	0.04003193601965904	-0.1316434144973755	-0.026910435408353806	0.04514862224459648	-0.13205662369728088	0.02629481628537178	0.045038361102342606	0.24614176154136658	-0.01787923090159893	0.016431931406259537	0.2301943153142929	-0.017837272956967354	0.016143834218382835	0.07368120551109314	-0.0551777258515358	0.0309291984885931	0.028293156996369362	-0.0693248063325882	0.024842940270900726	-0.0024619188625365496	-0.04196695238351822	0.006116644944995642	-0.01443946361541748
Dasypus nov 2006-565	0.2542823255062103	0.0019633853808045387	0.02536790817975998	0.15289074182510376	-4.042547079734504E-4	0.0296202190220356	-0.041308142244815826	-8.523056167177856E-4	0.0691090002655983	-0.1155133843421936	9.042778983712196E-4	0.05932115018367767	-0.13161151111125946	-4.051194409839809E-4	0.031219394877552986	0.1344657987356186	-0.010994242504239082	0.03186511993408203	0.13600103557109833	0.012006697244942188	0.03162591904401779	-0.0022416578140109777	-0.0399787463247776	0.03938768431544304	-0.0024720916990190744	0.04144734889268875	0.04168488457798958	-0.13757644593715668	-0.023755768314003944	0.0395907461643219	-0.138389453291893	0.018306123092770576	0.04071006923913956	0.23872271180152893	-0.014103768393397331	0.01785374991595745	0.224791020154953	-0.015342725440859795	0.01903562620282173	0.07830876857042313	-0.04374261945486069	0.031766943633556366	0.03908216580748558	-0.06453549861907959	0.018845949321985245	-8.371560397790745E-5	-0.0346185527741909	-0.0025707294698804617	-0.008343926630914211
Dasypus nov 2007-371	0.2604789435863495	-6.684633990516886E-5	0.018609551712870598	0.12578096985816956	5.128655466251075E-4	0.03900551795959473	-0.044292911887168884	1.446826645405963E-4	0.0732162594795227	-0.10828658193349838	-0.0037347779143601656	0.059909895062446594	-0.12966710329055786	-0.0029766627121716738	0.031375572085380554	0.1268518567085266	-0.013962325640022755	0.03594019263982773	0.12703263759613037	0.014849352650344372	0.03583661839365959	-0.010543846525251865	-0.05007372051477432	0.034952715039253235	-0.01236051693558693	0.05062822252511978	0.035556063055992126	-0.12398312985897064	-0.027043592184782028	0.04478536918759346	-0.12461456656455994	0.020935863256454468	0.046226151287555695	0.24599206447601318	-0.017948394641280174	0.01489569153636694	0.22306446731090546	-0.0171080119907856	0.016574621200561523	0.08211925625801086	-0.04738530144095421	0.03445195406675339	0.032732728868722916	-0.06893317401409149	0.02264583297073841	-0.006180828437209129	-0.04120665416121483	0.004769972991198301	-0.01870717667043209
Dasypus nov 2007-372	0.2620639503002167	0.0021443043369799852	0.011403609998524189	0.12644310295581818	-7.482811633963138E-5	0.04037758335471153	-0.04841899871826172	-2.361411025049165E-4	0.07492442429065704	-0.10810542106628418	-0.001813422772102058	0.05733304098248482	-0.12779167294502258	-7.634438225068152E-4	0.03316225856542587	0.12843604385852814	-0.013292483054101467	0.036942124366760254	0.1303241103887558	0.014544066973030567	0.036496154963970184	-0.015092228539288044	-0.050713684409856796	0.03688405081629753	-0.018600549548864365	0.05019497126340866	0.04334409907460213	-0.12524431943893433	-0.029350919649004936	0.03909868374466896	-0.12443668395280838	0.030452493578195572	0.03875840827822685	0.24665184319019318	-0.01734231971204281	0.010310863144695759	0.22656264901161194	-0.017302172258496284	0.012574410066008568	0.08115848153829575	-0.04779067635536194	0.03713563457131386	0.03311055898666382	-0.06860776990652084	0.021446753293275833	-0.004182755947113037	-0.040792401880025864	0.005443437956273556	-0.016398251056671143
Dasypus nov 2007-379	0.2649879455566406	0.00304525438696146	0.01882646232843399	0.13419672846794128	6.624960224144161E-4	0.03963770717382431	-0.036873817443847656	-0.0017083187121897936	0.07217644155025482	-0.10063540190458298	-5.426007555797696E-4	0.06201669201254845	-0.12748731672763824	-1.5425783931277692E-4	0.02916140668094158	0.13568076491355896	-0.008744986727833748	0.03793618083000183	0.13488560914993286	0.010284640826284885	0.038146622478961945	-0.014476140961050987	-0.05090521648526192	0.03173917159438133	-0.01846390776336193	0.047446057200431824	0.0336778350174427	-0.12180715799331665	-0.02311350591480732	0.04909728467464447	-0.12300417572259903	0.02154184691607952	0.04984864220023155	0.24804210662841797	-0.015750490128993988	0.013686945661902428	0.22589336335659027	-0.016727913171052933	0.01245010457932949	0.07726035267114639	-0.049901485443115234	0.03935035318136215	0.02896946854889393	-0.07196895033121109	0.01941998116672039	-0.003493644529953599	-0.04083772003650665	0.002096964279189706	-0.01744997687637806
Dasypus nov v3416	0.26105526089668274	0.0017395218601450324	0.020363157615065575	0.13377346098423004	3.727381117641926E-4	0.034484680742025375	-0.05159367620944977	0.0022218564990907907	0.07130221277475357	-0.10650366544723511	-0.0019095438765361905	0.05936310067772865	-0.12571725249290466	5.653443513438106E-4	0.02063663676381111	0.13245712220668793	-0.014666562899947166	0.030827809125185013	0.13413114845752716	0.014911559410393238	0.031197570264339447	-0.0163574181497097	-0.048614781349897385	0.042223501950502396	-0.01603223942220211	0.04855437949299812	0.041760437190532684	-0.12993888556957245	-0.02936597168445587	0.04243694245815277	-0.1320713311433792	0.025432869791984558	0.040915824472904205	0.24638499319553375	-0.016976136714220047	0.013428608886897564	0.2250792235136032	-0.017548728734254837	0.013755874708294868	0.07023391127586365	-0.05280830338597298	0.03356660157442093	0.03485514223575592	-0.06921003013849258	0.02575569599866867	-5.275629227980971E-4	-0.04427434504032135	0.013491417281329632	-0.013639301061630249
Dasypus nov v3418	0.2630480229854584	5.095037049613893E-4	0.019284797832369804	0.13719740509986877	0.002295485697686672	0.029665619134902954	-0.039981670677661896	-6.01547013502568E-4	0.0717126652598381	-0.11070866882801056	-3.108321106992662E-5	0.059654660522937775	-0.12825600802898407	3.2030808506533504E-4	0.02158815786242485	0.13639941811561584	-0.008743717335164547	0.029731839895248413	0.14229369163513184	0.008451850153505802	0.028595956042408943	-0.016840500757098198	-0.04964932054281235	0.03687732666730881	-0.01802055723965168	0.04852309077978134	0.03805433586239815	-0.13156776130199432	-0.028217976912856102	0.03767234459519386	-0.13607804477214813	0.02482205629348755	0.039252594113349915	0.2474178969860077	-0.01029688399285078	0.013179619796574116	0.23465542495250702	-0.016189316287636757	0.01484791561961174	0.07222607731819153	-0.04890599846839905	0.03233199194073677	0.030896347016096115	-0.06667397171258926	0.023961549624800682	-0.003940461203455925	-0.042451679706573486	0.007935597561299801	-0.015468083322048187
Dasypus nov AM78	0.2702427804470062	0.002881587715819478	0.025325104594230652	0.12970250844955444	5.924796569161117E-4	0.036307357251644135	-0.0368555411696434	-0.0012504810001701117	0.07151585072278976	-0.10628503561019897	-7.355822599492967E-4	0.059086982160806656	-0.12971758842468262	-5.732694990001619E-4	0.035808317363262177	0.12745943665504456	-0.01068093255162239	0.03552553057670593	0.1306086778640747	0.01213196199387312	0.03471844270825386	-0.01717689447104931	-0.04878714308142662	0.03688289225101471	-0.01706545054912567	0.04708467796444893	0.041591670364141464	-0.13087044656276703	-0.02141442522406578	0.04267581179738045	-0.129917174577713	0.022906502708792686	0.042642999440431595	0.25403210520744324	-0.014148344285786152	0.019836368039250374	0.2286228984594345	-0.013055536895990372	0.018643269315361977	0.07057412713766098	-0.05234444513916969	0.029202740639448166	0.03454522043466568	-0.06744270026683807	0.020389830693602562	-0.0034593003802001476	-0.04113893583416939	0.004745651502162218	-0.020033175125718117
Dasypus nov AP207	0.26306048035621643	5.325366510078311E-4	0.022460605949163437	0.12180300801992416	-6.755429785698652E-4	0.03521321713924408	-0.036246027797460556	4.7543991240672767E-4	0.06924658268690109	-0.10768213868141174	-2.2854651615489274E-4	0.05999792739748955	-0.13168950378894806	-0.0016365868505090475	0.02946794033050537	0.1301300823688507	-0.013432526029646397	0.030504804104566574	0.13184626400470734	0.01323567982763052	0.03030124306678772	-0.011948449537158012	-0.042790863662958145	0.03874160349369049	-0.017002934589982033	0.04219827428460121	0.0417349711060524	-0.13288384675979614	-0.029749000445008278	0.04326953738927841	-0.133765310049057	0.028907906264066696	0.04277196153998375	0.2457047700881958	-0.016491517424583435	0.018336961045861244	0.22482295334339142	-0.015710579231381416	0.01804898865520954	0.07484781742095947	-0.04410908743739128	0.0292185191065073	0.031829118728637695	-0.06587817519903183	0.022293157875537872	-0.003015616675838828	-0.036643337458372116	0.004944597836583853	-0.01137151475995779
Dasypus nov 23952	0.2660892605781555	-2.2878701565787196E-4	0.019106727093458176	0.1356075406074524	-0.0010701469145715237	0.030761929228901863	-0.04341352358460426	-7.612657645950094E-5	0.0681125745177269	-0.10760335624217987	-0.0020976627711206675	0.05462164431810379	-0.1238536685705185	-8.000709931366146E-4	0.01951746642589569	0.13533943891525269	-0.01317423302680254	0.02926628477871418	0.13738423585891724	0.01192134153097868	0.028430869802832603	-0.007467770017683506	-0.045628998428583145	0.04459638521075249	-0.012086437083780766	0.047331228852272034	0.040749236941337585	-0.12866553664207458	-0.028989369049668312	0.03477206826210022	-0.129062220454216	0.02549098990857601	0.034818630665540695	0.24505387246608734	-0.018868358805775642	0.01409713365137577	0.22468301653862	-0.01685437187552452	0.013116337358951569	0.07686866819858551	-0.04862931743264198	0.030217593535780907	0.03508667275309563	-0.06771707534790039	0.022497642785310745	-0.005721425171941519	-0.03962790593504906	0.008922121487557888	-0.020378047600388527
Dasypus nov 18024	0.2619343400001526	0.001273284200578928	0.025109101086854935	0.13764934241771698	0.0010817913571372628	0.0362725667655468	-0.03854408115148544	-9.228472663380671E-6	0.07233019918203354	-0.10853634029626846	-9.37785254791379E-4	0.058771371841430664	-0.12462511658668518	-2.138674899470061E-4	0.022569289430975914	0.1353122591972351	-0.01156795583665371	0.034237466752529144	0.13595306873321533	0.016492245718836784	0.03257100284099579	-0.015083183534443378	-0.04773696884512901	0.037755995988845825	-0.01673833839595318	0.04694543033838272	0.038800664246082306	-0.12988290190696716	-0.02761596441268921	0.040945786982774734	-0.12882100045681	0.025326678529381752	0.04255295172333717	0.24267207086086273	-0.017005767673254013	0.020494211465120316	0.220617413520813	-0.015674874186515808	0.021361634135246277	0.07403343915939331	-0.0528031624853611	0.03116692043840885	0.03131868690252304	-0.07292993366718292	0.0241774320602417	-0.0013619132805615664	-0.03990383818745613	0.007734222803264856	-0.01401282288134098
Dasypus nov 20958	0.2619495391845703	7.74725922383368E-4	0.02320750802755356	0.12722952663898468	2.8429244412109256E-4	0.038287315517663956	-0.03989201784133911	-3.041162563022226E-4	0.0702342689037323	-0.10567038506269455	-0.0017431832384318113	0.059314318001270294	-0.12528100609779358	-0.0015233105514198542	0.015093091875314713	0.13396385312080383	-0.012303697876632214	0.03435439243912697	0.13289040327072144	0.014910760335624218	0.03347707539796829	-0.01791132241487503	-0.048476122319698334	0.04102382808923721	-0.020031891763210297	0.04899311065673828	0.03841186314821243	-0.13062797486782074	-0.028969574719667435	0.0407833456993103	-0.13026849925518036	0.02714652754366398	0.04063808545470238	0.24414470791816711	-0.018503785133361816	0.01650220900774002	0.22678609192371368	-0.016962699592113495	0.016708476468920708	0.07888089865446091	-0.04792017489671707	0.02847151644527912	0.036736778914928436	-0.06962655484676361	0.023211799561977386	-0.0042212000116705894	-0.041026514023542404	0.007343241013586521	-0.017285890877246857
Dasypus nov 8538	0.2633378207683563	2.4195575679186732E-4	0.018602795898914337	0.13490772247314453	2.86147027509287E-4	0.037795111536979675	-0.041187554597854614	-8.638017461635172E-4	0.07099705189466476	-0.1049969345331192	-0.001878703711554408	0.060983847826719284	-0.12473080307245255	-0.002768817823380232	0.031238911673426628	0.132032573223114	-0.013314380310475826	0.03515157848596573	0.13259999454021454	0.016078313812613487	0.03460600972175598	-0.012527103535830975	-0.04339702054858208	0.04585355147719383	-0.014761357568204403	0.044410739094018936	0.03899569436907768	-0.12629970908164978	-0.025549788028001785	0.04276053234934807	-0.12802819907665253	0.02041337825357914	0.04458080977201462	0.24441683292388916	-0.017427856102585793	0.014307210221886635	0.22419364750385284	-0.01725129783153534	0.01472402922809124	0.07550320774316788	-0.044522035866975784	0.037350915372371674	0.035386305302381516	-0.066951684653759	0.02138459123671055	2.2825787891633809E-4	-0.03887328878045082	0.004040261264890432	-0.01298457570374012
Dasypus nov 29160	0.26242929697036743	0.004343052860349417	0.013065897859632969	0.1290137767791748	3.0602121842093766E-4	0.03800024837255478	-0.04476263001561165	-0.0010982381645590067	0.07014448195695877	-0.1035090982913971	-0.001120883272960782	0.05731944367289543	-0.12469565123319626	-1.3301581202540547E-4	0.018891701474785805	0.1264510601758957	-0.011781509965658188	0.037659451365470886	0.12996798753738403	0.011971086263656616	0.03627409040927887	-0.01614677533507347	-0.04946871101856232	0.036465972661972046	-0.01670962944626808	0.0478176511824131	0.04465822875499725	-0.12146115303039551	-0.0226585753262043	0.04220496863126755	-0.12121757864952087	0.02835073135793209	0.042259104549884796	0.2441924810409546	-0.014259346760809422	0.007385567296296358	0.22623105347156525	-0.014675664715468884	0.008473129943013191	0.07437680661678314	-0.05091099441051483	0.03724753484129906	0.03172887861728668	-0.07059686630964279	0.01872955821454525	-0.0012515047565102577	-0.04554663226008415	0.008581578731536865	-0.018616676330566406
Dasypus nov 15762	0.2552986443042755	0.002036008983850479	0.01990983821451664	0.13130657374858856	0.0025982833467423916	0.03241594508290291	-0.042850542813539505	0.0020765832159668207	0.0727633461356163	-0.10895849019289017	-0.0018456574762240052	0.05853291228413582	-0.13228777050971985	-9.962585754692554E-4	0.02881384640932083	0.12861953675746918	-0.01017047744244337	0.03177204355597496	0.12875214219093323	0.012646135874092579	0.03167905658483505	-0.016205446794629097	-0.04921897128224373	0.039489954710006714	-0.017948508262634277	0.04856839030981064	0.04222295060753822	-0.13154010474681854	-0.028608102351427078	0.03917762637138367	-0.1337357759475708	0.023985762149095535	0.03881698474287987	0.24987927079200745	-0.01665409840643406	0.010880907997488976	0.22716456651687622	-0.016638323664665222	0.010073907673358917	0.0694253146648407	-0.054602522403001785	0.035078972578048706	0.03379938378930092	-0.07070791721343994	0.028525810688734055	-0.002306183334439993	-0.04119063913822174	0.004819415044039488	-0.015875278040766716
Dasypus nov 31174	0.2621515393257141	-3.7494426942430437E-4	0.014760315418243408	0.13384327292442322	7.024856167845428E-4	0.03600064665079117	-0.042800117284059525	3.2995609217323363E-4	0.07245863229036331	-0.10779865086078644	-8.310622069984674E-4	0.058998968452215195	-0.13013124465942383	-0.0016916104359552264	0.01624532975256443	0.13787797093391418	-0.009313016198575497	0.03353380039334297	0.13748832046985626	0.011444219388067722	0.033126458525657654	-0.01645534485578537	-0.04751979559659958	0.04628613218665123	-0.01585555635392666	0.04751889780163765	0.043780677020549774	-0.12821388244628906	-0.025164294987916946	0.042382679879665375	-0.12768742442131042	0.023261887952685356	0.043375588953495026	0.2459246814250946	-0.016281520947813988	0.009610140696167946	0.22480647265911102	-0.016954366117715836	0.010635229758918285	0.07532868534326553	-0.046171873807907104	0.04087476804852486	0.0355946384370327	-0.06823544204235077	0.02458779700100422	-0.0019478913163766265	-0.040689922869205475	0.007936201989650726	-0.019275596365332603
Dasypus nov 7157	0.2570950388908386	0.0023765144869685173	0.014431606978178024	0.12040664255619049	8.187360363081098E-4	0.045622121542692184	-0.045466188341379166	-0.0019507379038259387	0.06651031970977783	-0.11216787248849869	1.3063436199445277E-4	0.05643031746149063	-0.12614686787128448	-0.001041992916725576	0.02342836745083332	0.12643839418888092	-0.01380267832428217	0.039707574993371964	0.12611053884029388	0.014753451570868492	0.039767082780599594	-0.014509841799736023	-0.04760485887527466	0.04187446087598801	-0.01891351118683815	0.043992478400468826	0.04323256388306618	-0.13324396312236786	-0.024259833618998528	0.03683553263545036	-0.1334070861339569	0.02334960736334324	0.037294816225767136	0.2421538382768631	-0.01755526289343834	0.006482355296611786	0.22763054072856903	-0.017930736765265465	0.007409237325191498	0.07907279580831528	-0.04741829261183739	0.039405640214681625	0.0399034284055233	-0.06950853019952774	0.02816048637032509	-0.001883969409391284	-0.041296012699604034	0.008570698089897633	-0.016366856172680855
Dasypus nov 12306	0.26064667105674744	0.00243246927857399	0.028139717876911163	0.13692811131477356	-3.358827088959515E-4	0.036106932908296585	-0.03981131315231323	6.921036983840168E-4	0.06698396801948547	-0.10761915147304535	7.7452213736251E-4	0.05571437254548073	-0.12994453310966492	-0.0018856276292353868	0.026020895689725876	0.13482201099395752	-0.011712088249623775	0.034299585968256	0.13313773274421692	0.013768899254500866	0.03423948958516121	7.628456805832684E-4	-0.04451420530676842	0.04385632276535034	-0.004245721269398928	0.043895840644836426	0.04140649363398552	-0.13164056837558746	-0.027275392785668373	0.03133096545934677	-0.13262376189231873	0.021615080535411835	0.03437334671616554	0.24216672778129578	-0.015605994500219822	0.018221033737063408	0.23169995844364166	-0.015594019554555416	0.019357677549123764	0.07982733845710754	-0.050125058740377426	0.027171028777956963	0.03812716528773308	-0.06806032359600067	0.020808152854442596	0.0027635274454951286	-0.038858961313962936	0.007815983146429062	-0.013028993271291256
Dasypus nov 29187	0.2632122039794922	5.581150981015526E-5	0.011285071261227131	0.1301954984664917	-0.0011369655840098858	0.038710106164216995	-0.044847216457128525	7.72736850194633E-4	0.07431070506572723	-0.10350312292575836	-3.7170376162976027E-4	0.05971970781683922	-0.13339586555957794	-6.225111428648233E-4	0.01631392352283001	0.13177761435508728	-0.013226230628788471	0.035412583500146866	0.13104425370693207	0.012188609689474106	0.035747651010751724	-0.013501298613846302	-0.052512917667627335	0.045573312789201736	-0.022828923538327217	0.051121391355991364	0.0480533242225647	-0.1262742280960083	-0.028771907091140747	0.040837012231349945	-0.12675972282886505	0.026836521923542023	0.04226645827293396	0.24476079642772675	-0.018650813028216362	0.008653838187456131	0.22842364013195038	-0.019091174006462097	0.010549467988312244	0.06683345884084702	-0.056648749858140945	0.035764481872320175	0.031034355983138084	-0.07243873924016953	0.021750085055828094	-0.0038975151255726814	-0.042905211448669434	0.009300995618104935	0.03353460878133774
Dasypus nov 281290	0.25820955634117126	0.0029600406996905804	0.017682677134871483	0.1420602649450302	-1.148948649642989E-4	0.032044705003499985	-0.04856465384364128	8.156594121828675E-4	0.07134007662534714	-0.11641871929168701	-0.001454357523471117	0.05747033283114433	-0.13526079058647156	-4.2553304228931665E-4	0.02177799493074417	0.13097384572029114	-0.012879408895969391	0.030989408493041992	0.13064804673194885	0.014385323040187359	0.030068138614296913	-0.01012625452131033	-0.04950840026140213	0.043979011476039886	-0.012874599546194077	0.048466432839632034	0.04385361820459366	-0.13665369153022766	-0.02506333403289318	0.035509806126356125	-0.13685494661331177	0.02095755562186241	0.036374643445014954	0.23829860985279083	-0.018438810482621193	0.01089993491768837	0.2278660386800766	-0.017826514318585396	0.009360467083752155	0.06904152035713196	-0.056801244616508484	0.027242178097367287	0.03771807253360748	-0.07298668473958969	0.02639496698975563	-0.0013974301982671022	-0.04030826687812805	0.009301379323005676	-0.017479807138442993
Dasypus nov A22839	0.2646879553794861	0.0022579755168408155	0.014174597337841988	0.1367272585630417	4.648616595659405E-4	0.03382830321788788	-0.04331539571285248	-7.594636408612132E-4	0.06863193213939667	-0.10571994632482529	0.0020629807841032743	0.05823386088013649	-0.1352008730173111	-1.463029911974445E-4	0.0186777226626873	0.13357914984226227	-0.011021818034350872	0.0341656319797039	0.13282060623168945	0.011159593239426613	0.03383013606071472	-0.01567578874528408	-0.04567801207304001	0.04152205213904381	-0.01438375934958458	0.04318254068493843	0.04262683913111687	-0.13059526681900024	-0.02725881338119507	0.036666836589574814	-0.129561185836792	0.025900863111019135	0.03818371519446373	0.24346698820590973	-0.013532516546547413	0.011425415053963661	0.22818712890148163	-0.014402481727302074	0.011049759574234486	0.07432189583778381	-0.04325902834534645	0.033172350376844406	0.04267267510294914	-0.06557266414165497	0.02005968801677227	-0.0026186539325863123	-0.04007238149642944	0.006333314813673496	-0.0200781412422657
Dasypus nov 283467	0.25945571064949036	9.85208316706121E-4	0.021824389696121216	0.14025472104549408	6.410378846339881E-4	0.032471027225255966	-0.040937282145023346	0.001093467464670539	0.06757991760969162	-0.11028440296649933	-0.002048869850113988	0.05924329161643982	-0.1268114596605301	-1.2814423826057464E-4	0.021476268768310547	0.13396106660366058	-0.013468881137669086	0.03175341337919235	0.1351257562637329	0.014663386158645153	0.03062422387301922	-0.0037817927077412605	-0.044626519083976746	0.041409097611904144	-0.0011163164163008332	0.044613875448703766	0.03512221574783325	-0.13504670560359955	-0.02646985463798046	0.04185323044657707	-0.13515259325504303	0.023442678153514862	0.042582910507917404	0.23959022760391235	-0.01633526012301445	0.016053689643740654	0.22705036401748657	-0.016334975138306618	0.018278025090694427	0.07606325298547745	-0.04932142794132233	0.028792191296815872	0.03743887320160866	-0.06768803298473358	0.019162284210324287	-2.1430570632219315E-4	-0.038155697286129	0.006392189767211676	-0.013145416043698788
Dasypus nov 339669	0.2639971971511841	0.001167507958598435	0.023686973378062248	0.12736736238002777	5.208803340792656E-4	0.03502083197236061	-0.03390125185251236	-7.79707683250308E-4	0.0777176022529602	-0.10840477049350739	-0.0010049381526187062	0.06213439628481865	-0.12975077331066132	-0.0016428042436018586	0.03490434214472771	0.13320033252239227	-0.007495457772165537	0.03358042240142822	0.1339951753616333	0.01077861338853836	0.0327657051384449	-0.012754908762872219	-0.04956229031085968	0.04232209920883179	-0.012413457967340946	0.0497276671230793	0.04200255498290062	-0.12997521460056305	-0.02538842335343361	0.046823784708976746	-0.12882353365421295	0.022170502692461014	0.048289500176906586	0.24593155086040497	-0.0163411907851696	0.01894908770918846	0.2243971973657608	-0.015722868964076042	0.017334049567580223	0.07069037109613419	-0.04920759052038193	0.035086728632450104	0.03137413039803505	-0.06683912873268127	0.0241741631180048	-0.0031414844561368227	-0.04250054806470871	0.006071464624255896	-0.015425961464643478
Dasypus nov 565067	0.26743537187576294	0.0022068906109780073	0.014406594447791576	0.1379244327545166	-1.602780685061589E-4	0.037122588604688644	-0.03885461390018463	-5.997591651976109E-4	0.06627865880727768	-0.1050272136926651	-6.273296312429011E-4	0.05334118381142616	-0.12839634716510773	-0.001662764116190374	0.019941240549087524	0.1339988112449646	-0.013947036117315292	0.03606868162751198	0.13291628658771515	0.012670030817389488	0.03638478368520737	-0.012550149112939835	-0.04379430040717125	0.03644254803657532	-0.015074939467012882	0.04382581636309624	0.04214965179562569	-0.12915369868278503	-0.025402715429663658	0.03895073011517525	-0.12882284820079803	0.02265305444598198	0.041169218719005585	0.24601423740386963	-0.01882932521402836	0.00907440297305584	0.2287110984325409	-0.017079094424843788	0.011696919798851013	0.07349276542663574	-0.05078064277768135	0.0361291840672493	0.04049556702375412	-0.06743466109037399	0.02064763754606247	-0.0022937594912946224	-0.038214311003685	0.007646440528333187	-0.015487829223275185
Dasypus nov 568206	0.2655599117279053	0.004851236939430237	0.01972219906747341	0.13132023811340332	5.270182737149298E-4	0.03932187333703041	-0.04180936887860298	-4.350451345089823E-4	0.06625782698392868	-0.10249174386262894	0.001281925942748785	0.06118294224143028	-0.1268174946308136	-0.0013749096542596817	0.015654224902391434	0.133581280708313	-0.009862392209470272	0.03735429793596268	0.13233722746372223	0.01188038568943739	0.03677476570010185	-0.018729878589510918	-0.04900442063808441	0.038002897053956985	-0.02313094027340412	0.045781418681144714	0.04067996144294739	-0.12684953212738037	-0.02425103820860386	0.04481501132249832	-0.12487032264471054	0.02481692098081112	0.04510756582021713	0.2470816671848297	-0.016234854236245155	0.014838747680187225	0.2294156402349472	-0.016434917226433754	0.014107052236795425	0.07189182192087173	-0.049886126071214676	0.03947994485497475	0.036447376012802124	-0.0724342092871666	0.0189812034368515	-0.004346160218119621	-0.0410890094935894	0.0025766929611563683	-0.021801911294460297
Dasypus nov 33867	0.26173147559165955	0.003225654363632202	0.01882745325565338	0.1293019950389862	0.0010540366638451815	0.04123956710100174	-0.03991319611668587	0.0017775770975276828	0.06801342219114304	-0.10576290637254715	-9.526855865260586E-5	0.06266911327838898	-0.12819373607635498	-5.964085576124489E-4	0.019493941217660904	0.12919767200946808	-0.013475961051881313	0.038615889847278595	0.13274966180324554	0.014786324463784695	0.03722848743200302	-0.021670525893568993	-0.04783931374549866	0.03663492202758789	-0.01829073578119278	0.0480971522629261	0.03335270658135414	-0.12277159094810486	-0.02338290400803089	0.049078237265348434	-0.12379266321659088	0.023444585502147675	0.05021924525499344	0.2443789541721344	-0.01565702259540558	0.01388478558510542	0.2240898162126541	-0.017384923994541168	0.012320410460233688	0.07918006926774979	-0.04902295023202896	0.03913477435708046	0.03416689112782478	-0.07145415991544724	0.02467358484864235	-0.0032521244138479233	-0.04223732277750969	0.004250612109899521	-0.01827961765229702
Dasypus nov 244903	0.2580103576183319	0.0014863453106954694	0.019774485379457474	0.1466406136751175	0.0012095589190721512	0.03450313210487366	-0.03607454523444176	-9.824702283367515E-4	0.06552685052156448	-0.09756232798099518	-8.112131617963314E-4	0.05782295763492584	-0.12371143698692322	-0.001154051162302494	0.02063334360718727	0.141388937830925	-0.008824991062283516	0.03356480970978737	0.14183183014392853	0.010426795110106468	0.03404155373573303	-0.013583879917860031	-0.048254743218421936	0.03869505226612091	-0.01453753374516964	0.04628622159361839	0.03843071684241295	-0.12327122688293457	-0.023133104667067528	0.044142935425043106	-0.12315887212753296	0.022580794990062714	0.04338236525654793	0.24097110331058502	-0.016145141795277596	0.01367365662008524	0.22471977770328522	-0.017279382795095444	0.012614667415618896	0.07354103773832321	-0.047750797122716904	0.03757705166935921	0.037098683416843414	-0.0694953054189682	0.022838879376649857	-0.004090046975761652	-0.040244705975055695	0.004945892840623856	-0.020893778651952744
Dasypus nov 406700	0.25865989923477173	0.0013901017373427749	0.024884110316634178	0.14097389578819275	8.586614058003761E-6	0.03431641682982445	-0.042206376791000366	0.0018245649989694357	0.06930477172136307	-0.10591758042573929	2.79473140835762E-4	0.06073456630110741	-0.12687668204307556	-8.511655614711344E-4	0.02734595350921154	0.138332799077034	-0.011858021840453148	0.030700191855430603	0.14043234288692474	0.014153942465782166	0.0316774956882	-0.0036942586302757263	-0.047540921717882156	0.039466723799705505	-0.004738588817417622	0.048173677176237106	0.041180066764354706	-0.12833164632320404	-0.02365192584693432	0.04607642441987991	-0.12767371535301208	0.024626215919852257	0.04474971443414688	0.2405547946691513	-0.015752173960208893	0.01897781528532505	0.22542063891887665	-0.016255728900432587	0.01690039224922657	0.07073220610618591	-0.05675332620739937	0.03141377866268158	0.040288250893354416	-0.06917627155780792	0.019270794466137886	-4.812773549929261E-4	-0.041522201150655746	0.007296700030565262	-0.014907279051840305
Dasypus nov 337563	0.2625182569026947	0.0031061607878655195	0.01941857486963272	0.12804542481899261	7.302524754777551E-4	0.03896092623472214	-0.03573869541287422	0.0010142754763364792	0.06586921960115433	-0.10154817253351212	9.885189356282353E-4	0.060273367911577225	-0.12410072237253189	-1.0910445416811854E-4	0.018696801736950874	0.12761159241199493	-0.01042931154370308	0.038342393934726715	0.12848973274230957	0.012785370461642742	0.03717651963233948	-0.007299466989934444	-0.044597070664167404	0.040089599788188934	-0.014596473425626755	0.04174935445189476	0.04379415139555931	-0.12279720604419708	-0.02746661938726902	0.043367255479097366	-0.12275444716215134	0.025643086060881615	0.044542163610458374	0.24333889782428741	-0.018079686909914017	0.014165502972900867	0.22604238986968994	-0.017318908125162125	0.014798657037317753	0.07814318686723709	-0.05012885853648186	0.031823642551898956	0.04049400985240936	-0.06787567585706711	0.019072353839874268	-0.001495176344178617	-0.03942923992872238	0.004720310214906931	-0.013875841163098812
Dasypus nov 32868	0.26662519574165344	0.001376389293000102	0.022699829190969467	0.13905149698257446	4.15485497796908E-4	0.033984601497650146	-0.04157289117574692	-0.0011342661455273628	0.07530086487531662	-0.10868365317583084	-9.493377292528749E-4	0.05942389741539955	-0.12539826333522797	-3.346519952174276E-4	0.02445857785642147	0.13911953568458557	-0.01038588397204876	0.03324321284890175	0.1372826099395752	0.013304192572832108	0.03272198513150215	-0.019518109038472176	-0.05253831669688225	0.03389738127589226	-0.01888171210885048	0.05199943855404854	0.03416099399328232	-0.13122984766960144	-0.027335621416568756	0.041166894137859344	-0.130730539560318	0.025881905108690262	0.040528517216444016	0.24590696394443512	-0.016676174476742744	0.01611684076488018	0.22991766035556793	-0.017283208668231964	0.015653960406780243	0.07524917274713516	-0.05192217230796814	0.03366232290863991	0.03161958232522011	-0.0692090168595314	0.020261449739336967	-0.004178048577159643	-0.040795549750328064	0.006566664204001427	-0.018014267086982727
Dasypus nov 31693	0.263446182012558	0.0023515226785093546	0.020440571010112762	0.1335558146238327	9.083174518309534E-5	0.03394249454140663	-0.034871477633714676	-0.002061244333162904	0.0719216987490654	-0.1089741587638855	-0.0015603688079863787	0.05210926756262779	-0.12544868886470795	-0.0015665777027606964	0.016770407557487488	0.13004279136657715	-0.012809584848582745	0.03385259956121445	0.13282226026058197	0.013346410356462002	0.03260226920247078	-0.018130116164684296	-0.05085155367851257	0.03393596038222313	-0.015933502465486526	0.049774300307035446	0.03629527613520622	-0.13186626136302948	-0.02746526338160038	0.035164546221494675	-0.13262784481048584	0.026389753445982933	0.0359056256711483	0.24107114970684052	-0.016172809526324272	0.011445604264736176	0.2292400300502777	-0.01632915809750557	0.010985022410750389	0.07480946183204651	-0.05240846052765846	0.03493911400437355	0.03591534495353699	-0.06964527070522308	0.021673006936907768	-0.0024882792495191097	-0.042625389993190765	0.010230454616248608	-0.02069084905087948
Dasypus nov 32275	0.2644672393798828	0.0014062505215406418	0.0203254297375679	0.12432365864515305	3.271218520239927E-5	0.0365874283015728	-0.036283448338508606	-0.0013931522844359279	0.06845197826623917	-0.1079249233007431	-0.0018970100209116936	0.057207878679037094	-0.13029007613658905	9.136460721492767E-5	0.023288119584321976	0.1264326125383377	-0.012935648672282696	0.033291637897491455	0.12185337394475937	0.013185946270823479	0.035379912704229355	-0.013887021690607071	-0.047948580235242844	0.036048803478479385	-0.016352970153093338	0.04726912081241608	0.034175992012023926	-0.13056176900863647	-0.025238748639822006	0.04359825700521469	-0.1317276507616043	0.02258951961994171	0.04369059205055237	0.24860376119613647	-0.014901489019393921	0.016480591148138046	0.2318071871995926	-0.015350688248872757	0.016213813796639442	0.06975020468235016	-0.05286990851163864	0.03191903978586197	0.03398337587714195	-0.0692148432135582	0.02187992073595524	-8.239520830102265E-4	-0.04305819422006607	0.008543106727302074	-0.017141858115792274
Dasypus nov 32261	0.2669624388217926	0.0011627068743109703	0.017347365617752075	0.13440102338790894	4.912124713882804E-4	0.03729216754436493	-0.04495390132069588	0.001749001326970756	0.06686902791261673	-0.1070440262556076	-0.0010520925279706717	0.05612025782465935	-0.1277225911617279	-0.002214709296822548	0.021344590932130814	0.137369304895401	-0.012899830006062984	0.03299492597579956	0.13816916942596436	0.01402045413851738	0.03270982578396797	-0.015189933590590954	-0.04780435562133789	0.04188511520624161	-0.015509678050875664	0.04666720703244209	0.04236786812543869	-0.1319008469581604	-0.02420462667942047	0.037734076380729675	-0.13085827231407166	0.022203702479600906	0.038776203989982605	0.24997122585773468	-0.017157793045043945	0.013399048708379269	0.227305606007576	-0.01565823331475258	0.01294373907148838	0.07457278668880463	-0.04955447465181351	0.02959691360592842	0.03846641629934311	-0.06944594532251358	0.019504323601722717	-0.0022455588914453983	-0.040775369852781296	0.012705324217677116	-0.01641952618956566
Dasypus nov 31996	0.26775163412094116	-8.054676582105458E-4	0.017755188047885895	0.13896265625953674	-1.1810318392235786E-4	0.0317288339138031	-0.0469595268368721	6.736468058079481E-4	0.07313582301139832	-0.11380228400230408	-9.30453825276345E-4	0.055484235286712646	-0.12963084876537323	-0.0020657361019402742	0.018923742696642876	0.13695409893989563	-0.012531261891126633	0.030231822282075882	0.14028675854206085	0.010671965777873993	0.02996831201016903	-0.01892157644033432	-0.04762423038482666	0.03803592920303345	-0.025272557511925697	0.04661727324128151	0.04296936094760895	-0.13507825136184692	-0.02459609881043434	0.03641945496201515	-0.1365659087896347	0.024058716371655464	0.03492382913827896	0.24907466769218445	-0.017545310780405998	0.012536805123090744	0.23418545722961426	-0.017337776720523834	0.012469524517655373	0.0676991268992424	-0.04969046264886856	0.03559941425919533	0.02849624492228031	-0.0688822790980339	0.02410464733839035	-0.004730473272502422	-0.03914877399802208	0.008873923681676388	-0.011494392529129982
Dasypus nov 1-2-1-34	0.2594653367996216	0.0012354131322354078	0.029102496802806854	0.1329965442419052	7.858417229726911E-4	0.036313410848379135	-0.03273720666766167	3.5996531369164586E-4	0.0706109032034874	-0.099416583776474	-0.0019691823981702328	0.06436944007873535	-0.129410520195961	4.866188101004809E-4	0.026131102815270424	0.12944035232067108	-0.008197394199669361	0.035781171172857285	0.1311006397008896	0.00945982988923788	0.035832442343235016	-0.0018105513881891966	-0.0443127416074276	0.03885684162378311	-0.0063602859154343605	0.04329966381192207	0.038646869361400604	-0.12831281125545502	-0.028819402679800987	0.04718912020325661	-0.1295979619026184	0.025171052664518356	0.047207385301589966	0.24069148302078247	-0.015962442383170128	0.021705640479922295	0.22325554490089417	-0.01560614537447691	0.021223049610853195	0.07692024856805801	-0.047789979726076126	0.029667532071471214	0.03834599256515503	-0.06666480004787445	0.017576515674591064	0.0014677783474326134	-0.037626709789037704	1.8494580581318587E-4	-0.013447933830320835
Dasypus nov 3-7-7-150	0.2608928680419922	0.0013265225570648909	0.021214116364717484	0.13338004052639008	0.002268815878778696	0.035395391285419464	-0.03859047219157219	0.0012789429165422916	0.07261914014816284	-0.11572521924972534	-5.054782959632576E-4	0.061953697353601456	-0.1355150192975998	-0.001659164554439485	0.020853709429502487	0.13052646815776825	-0.008673002012073994	0.03380431979894638	0.13009805977344513	0.012539906427264214	0.03409704193472862	2.2615860507357866E-4	-0.04874447360634804	0.039921052753925323	3.432298544794321E-4	0.04792351275682449	0.04240957275032997	-0.13652761280536652	-0.027911173179745674	0.041214343160390854	-0.1375836879014969	0.026401381939649582	0.04147541895508766	0.2423207312822342	-0.016688013449311256	0.017133930698037148	0.22080855071544647	-0.015336887910962105	0.01778438873589039	0.07359624654054642	-0.051944080740213394	0.031145675107836723	0.04152534902095795	-0.06745650619268417	0.019623804837465286	0.002271926263347268	-0.039552800357341766	0.003172782715409994	-0.01148491445928812
Dasypus nov 1-6-6-85	0.26363831758499146	-0.0010468523250892758	0.022006651386618614	0.14029976725578308	-0.001003815676085651	0.035685595124959946	-0.03865032643079758	-1.4310132428363431E-5	0.0663493424654007	-0.1032237559556961	-9.791197226149961E-5	0.05986415594816208	-0.12683047354221344	-0.0016518604243174195	0.021642614156007767	0.134165421128273	-0.012089390307664871	0.035294823348522186	0.1351432353258133	0.01296800747513771	0.03538091480731964	-0.005166752729564905	-0.043876513838768005	0.03404007852077484	-0.005915661342442036	0.04426978528499603	0.03491989150643349	-0.12513568997383118	-0.02269117534160614	0.04379046708345413	-0.12627379596233368	0.02253822796046734	0.04223226383328438	0.24582260847091675	-0.017714502289891243	0.015382064506411552	0.2296980917453766	-0.01809932105243206	0.014893296174705029	0.07942268252372742	-0.045435283333063126	0.027566077187657356	0.03609781339764595	-0.06453924626111984	0.015182913281023502	2.324860543012619E-4	-0.03820677846670151	0.005114940460771322	-0.013244017027318478
Dasypus nov 82-9-30-31	0.26484188437461853	0.0029788643587380648	0.02056504227221012	0.13895151019096375	4.448874096851796E-4	0.03434953838586807	-0.04037719964981079	5.985594470985234E-4	0.07118236273527145	-0.11343593150377274	-1.9151135347783566E-4	0.06000244617462158	-0.13144628703594208	0.0018014645902439952	0.02579275332391262	0.1365956813097	-0.009455906227231026	0.034070488065481186	0.1369398534297943	0.011481080204248428	0.033510468900203705	-0.0050249649211764336	-0.04610425978899002	0.04280921071767807	-0.002143657533451915	0.04503755271434784	0.044068265706300735	-0.13572284579277039	-0.02624988555908203	0.040353190153837204	-0.1341182291507721	0.026095010340213776	0.04097651690244675	0.2488163709640503	-0.014565123245120049	0.016524743288755417	0.2204236388206482	-0.013883656822144985	0.01743868924677372	0.06812171638011932	-0.05717796832323074	0.027471361681818962	0.0376497358083725	-0.0717594251036644	0.018040431663393974	-4.4921101653017104E-4	-0.0385875478386879	0.0055701397359371185	-0.012692329473793507
Dasypus nov 3-7-7-146	0.26762160658836365	0.001750911003910005	0.01978631131350994	0.13098539412021637	-4.810453683603555E-4	0.03804250806570053	-0.03559337928891182	7.116305059753358E-4	0.0686844065785408	-0.09951312094926834	-4.242563736625016E-4	0.061204519122838974	-0.12997175753116608	-0.0019694429356604815	0.024530457332730293	0.12993314862251282	-0.010923533700406551	0.03773169219493866	0.12967830896377563	0.010991276241838932	0.03748114034533501	4.594338242895901E-4	-0.04561150446534157	0.037754952907562256	2.346798573853448E-4	0.046771444380283356	0.039033498615026474	-0.12207334488630295	-0.022526072338223457	0.04464203119277954	-0.12432938814163208	0.021879995241761208	0.04588765278458595	0.24900273978710175	-0.016701964661478996	0.017781974747776985	0.22560346126556396	-0.015399500727653503	0.018506454303860664	0.07576531171798706	-0.04836983233690262	0.03306986019015312	0.03895213454961777	-0.06621404737234116	0.014739694073796272	-0.0014542265562340617	-0.03568160533905029	0.0014212019741535187	-0.013818765990436077
Dasypus nov 3-9-4-102	0.2645381987094879	0.003017100039869547	0.021037742495536804	0.13657689094543457	9.638810879550874E-4	0.03681550547480583	-0.044602278620004654	4.763005199492909E-5	0.06991596519947052	-0.10644242912530899	-9.190714918076992E-4	0.05994562432169914	-0.1291947364807129	-5.243803607299924E-4	0.02786117233335972	0.13243038952350616	-0.012994634918868542	0.03589937835931778	0.1328635960817337	0.014215780422091484	0.035644713789224625	-0.005110055208206177	-0.04650570824742317	0.041499145328998566	-0.0011453398037701845	0.045480240136384964	0.041258521378040314	-0.12842221558094025	-0.02530699409544468	0.040224749594926834	-0.12739600241184235	0.02337316982448101	0.042583003640174866	0.24371714890003204	-0.015478795394301414	0.015443491749465466	0.23095592856407166	-0.015054156072437763	0.017982766032218933	0.06820585578680038	-0.05109700933098793	0.03245111182332039	0.04115287587046623	-0.06543955951929092	0.02073737233877182	0.0011135031236335635	-0.04037129506468773	0.0023244041949510574	-0.012605181895196438
Dasypus nov 1-6-6-84	0.2593066692352295	0.0031090977136045694	0.020994728431105614	0.1335873007774353	5.637174472212791E-4	0.03734660521149635	-0.04144873842597008	5.482611231855117E-5	0.07189267873764038	-0.11145205050706863	-7.904605008661747E-4	0.05963906645774841	-0.13437366485595703	-0.0014917691005393863	0.02084966190159321	0.13404126465320587	-0.015913862735033035	0.033919479697942734	0.13516099750995636	0.014217088930308819	0.03485996276140213	-0.0016955354949459434	-0.04830959811806679	0.038215361535549164	-0.002511704806238413	0.04676607996225357	0.03830341622233391	-0.13437806069850922	-0.029432104900479317	0.04221702367067337	-0.13486795127391815	0.027286404743790627	0.04179512336850166	0.24317830801010132	-0.015844017267227173	0.014313885942101479	0.23047266900539398	-0.016076112166047096	0.01600555330514908	0.07410643249750137	-0.049611132591962814	0.03325392305850983	0.03549625352025032	-0.06918742507696152	0.018050720915198326	-1.9488958059810102E-4	-0.04094016179442406	0.004475487861782312	-0.01409605611115694
Dasypus nov 5-7-5-22	0.2748871445655823	9.363979334011674E-4	0.022288592532277107	0.13116486370563507	-3.504230116959661E-4	0.036000896245241165	-0.04540569707751274	-5.159127176739275E-4	0.06531395763158798	-0.1017269566655159	-6.628722767345607E-4	0.05918725207448006	-0.11835610866546631	-0.0010686132591217756	0.020223889499902725	0.12360671162605286	-0.01064089871942997	0.037067919969558716	0.12420086562633514	0.011663342826068401	0.03774691000580788	-0.016400663182139397	-0.04669298231601715	0.03830983117222786	-0.016753215342760086	0.04776608198881149	0.03417935222387314	-0.1231660395860672	-0.027428537607192993	0.046053484082221985	-0.1256418079137802	0.02396301180124283	0.044661566615104675	0.2569034993648529	-0.01736379787325859	0.01189320720732212	0.23990124464035034	-0.01694345474243164	0.011039664037525654	0.061932288110256195	-0.06147930771112442	0.027980752289295197	0.03199486806988716	-0.06889049708843231	0.021867703646421432	-0.007133090868592262	-0.04199445620179176	0.009346452541649342	-0.021560750901699066
Dasypus nov 28-10-11-54	0.27078554034233093	-0.0013064892264083028	0.02455826848745346	0.12725825607776642	8.05104908067733E-4	0.039983119815588	-0.04040594398975372	-4.2011422920040786E-4	0.07037699222564697	-0.10277189314365387	-0.0011311429552733898	0.060352493077516556	-0.1267370581626892	-4.5391847379505634E-4	0.018323205411434174	0.13143737614154816	-0.01019234023988247	0.03730964660644531	0.1312468945980072	0.011913365684449673	0.037357304245233536	-0.005333489738404751	-0.04453977569937706	0.03955928981304169	-0.006813515909016132	0.04576459154486656	0.03928304836153984	-0.1267615556716919	-0.026336954906582832	0.043595071882009506	-0.12706848978996277	0.022835204377770424	0.043840598315000534	0.2511082887649536	-0.018367266282439232	0.018757065758109093	0.22896432876586914	-0.01604391261935234	0.019708069041371346	0.076675646007061	-0.05169467628002167	0.025785721838474274	0.03434132784605026	-0.06822068244218826	0.017704995349049568	-0.0013917608885094523	-0.037402816116809845	0.00580323813483119	-0.015517841093242168
Dasypus nov 11-10-27-3	0.2618181109428406	0.0015504829352721572	0.024648433551192284	0.14315643906593323	0.001974904676899314	0.034976374357938766	-0.034515004605054855	-8.775278693065047E-4	0.06583751738071442	-0.1038697212934494	-0.0013617114163935184	0.05794663354754448	-0.12773247063159943	-0.001376439817249775	0.013883671723306179	0.13510845601558685	-0.007918971590697765	0.03569827228784561	0.13391609489917755	0.011306636035442352	0.035588283091783524	-0.0042815180495381355	-0.04557399824261665	0.037784166634082794	-0.004866024479269981	0.04470756649971008	0.039675917476415634	-0.12670156359672546	-0.022560030221939087	0.040322195738554	-0.12717188894748688	0.018750324845314026	0.04141337797045708	0.24291999638080597	-0.016254812479019165	0.016935473307967186	0.224799245595932	-0.01763845607638359	0.016544843092560768	0.07218912243843079	-0.05010924115777016	0.03225181996822357	0.03613721951842308	-0.06564107537269592	0.023657796904444695	-8.521260460838675E-4	-0.03730059415102005	0.006161164492368698	-0.012459078803658485
Dasypus nov 84-357	0.2640879154205322	0.004982050973922014	0.020985720679163933	0.13964617252349854	0.0013846674701198936	0.03267914429306984	-0.042041659355163574	2.419549273326993E-4	0.07144530117511749	-0.10608578473329544	-6.603128276765347E-4	0.05933252349495888	-0.12908177077770233	-0.0013438727473840117	0.020415237173438072	0.13189104199409485	-0.008381001651287079	0.03347103297710419	0.13305316865444183	0.012140315026044846	0.032643478363752365	-0.017433324828743935	-0.046963609755039215	0.038000959903001785	-0.01794174127280712	0.04584363475441933	0.038771018385887146	-0.12711617350578308	-0.024691179394721985	0.044495001435279846	-0.12732139229774475	0.0204456839710474	0.04645653814077377	0.24612371623516083	-0.01621869206428528	0.01640658639371395	0.23148290812969208	-0.016323627904057503	0.014383449219167233	0.07652268558740616	-0.04561121016740799	0.03434646129608154	0.03882976993918419	-0.0653841570019722	0.024116935208439827	-0.005307657644152641	-0.04137904942035675	0.004370694048702717	-0.017384923994541168
Dasypus nov 26-1-12-22	0.26864802837371826	0.0013447406236082315	0.020975230261683464	0.1361856311559677	3.5308909718878567E-4	0.034866686910390854	-0.03940548002719879	-7.659062976017594E-4	0.06948390603065491	-0.1030282974243164	-0.0019344157772138715	0.055976733565330505	-0.12609609961509705	-6.267637945711613E-4	0.012002857401967049	0.13705414533615112	-0.008582767099142075	0.03483990952372551	0.13688606023788452	0.00985980499535799	0.03461917117238045	-0.0013606547145172954	-0.044143591076135635	0.03647812083363533	-0.0034557676408439875	0.043133728206157684	0.03984059765934944	-0.1252458691596985	-0.024994662031531334	0.04381822422146797	-0.12606962025165558	0.02359425462782383	0.0439588837325573	0.24910125136375427	-0.014888848178088665	0.0182859655469656	0.22408531606197357	-0.013096403330564499	0.02058929018676281	0.0778132826089859	-0.050394456833601	0.03213733807206154	0.038057949393987656	-0.06528056412935257	0.018513796851038933	-0.0029232576489448547	-0.03833773359656334	0.004206791054457426	-0.014802551828324795
Dasypus nov 28-10-11-53	0.26237693428993225	0.002809974132105708	0.02302684634923935	0.14524772763252258	-2.2664629796054214E-4	0.03135238215327263	-0.03938818722963333	-4.25388861913234E-4	0.06702113151550293	-0.11185707151889801	-0.0014086359879001975	0.059543199837207794	-0.12798261642456055	-0.0021955256815999746	0.018602877855300903	0.141421839594841	-0.010703466832637787	0.03147796168923378	0.13826394081115723	0.011912118643522263	0.03166496753692627	-0.004684434738010168	-0.047347232699394226	0.040563855320215225	-0.004532908089458942	0.047327328473329544	0.03997627645730972	-0.13241250813007355	-0.025945421308279037	0.03892859071493149	-0.13152138888835907	0.02578931674361229	0.040933866053819656	0.24186700582504272	-0.013893055729568005	0.015364385209977627	0.21971052885055542	-0.0145177710801363	0.017561396583914757	0.07157288491725922	-0.05196444317698479	0.028323646634817123	0.03435160219669342	-0.0703943744301796	0.023497484624385834	-0.0034142141230404377	-0.04023047909140587	0.0052137658931314945	-0.01413936447352171
Dasypus nov 3-9-4-101	0.26342129707336426	-3.4996759495697916E-4	0.02066817693412304	0.1485671103000641	0.0017184991156682372	0.03406218811869621	-0.042098015546798706	7.929116254672408E-4	0.07263194769620895	-0.11277297884225845	-0.002111844252794981	0.05966082960367203	-0.13024918735027313	-0.001364570576697588	0.014768717810511589	0.14212094247341156	-0.011136580258607864	0.03183620050549507	0.14183758199214935	0.012877189554274082	0.03243247792124748	0.001687616459093988	-0.048076923936605453	0.04060164839029312	4.2177410796284676E-4	0.04825615882873535	0.04129467532038689	-0.12755842506885529	-0.02904415689408779	0.03600015863776207	-0.13188879191875458	0.025069719180464745	0.03978705778717995	0.24292869865894318	-0.017263419926166534	0.016860194504261017	0.22073699533939362	-0.013873579911887646	0.020025435835123062	0.07030605524778366	-0.053620994091033936	0.028190482407808304	0.03325096145272255	-0.06829097867012024	0.019847217947244644	0.0040690056048333645	-0.03906076028943062	0.0014343226794153452	-0.011831020936369896
Dasypus nov 82-7-26-12	0.2609032392501831	0.0014902882976457477	0.01959552988409996	0.1381121277809143	-1.7660642333794385E-4	0.03812766075134277	-0.033493462949991226	-5.082781426608562E-4	0.07448016852140427	-0.10075431317090988	-7.161822286434472E-4	0.05729258060455322	-0.12574774026870728	-0.0010181027464568615	0.01892414502799511	0.1323663741350174	-0.01318398118019104	0.03778478875756264	0.13229818642139435	0.012028686702251434	0.038257356733083725	-0.0075449771247804165	-0.04790915548801422	0.03621017187833786	-0.011365341953933239	0.04677126929163933	0.03716578334569931	-0.12207702547311783	-0.022669151425361633	0.046084363013505936	-0.12267617136240005	0.021204749122262	0.04641319811344147	0.24361035227775574	-0.017576491460204124	0.012544249184429646	0.22119355201721191	-0.0170744676142931	0.014621962793171406	0.08063825964927673	-0.04816458374261856	0.0379536971449852	0.039317864924669266	-0.06597759574651718	0.025313686579465866	-0.002219810849055648	-0.04065840318799019	0.006139197386801243	-0.017170529812574387
Dasypus nov 82-9-30-32	0.26330018043518066	0.002244401490315795	0.025851018726825714	0.14262528717517853	-0.0010570986196398735	0.03528725355863571	-0.04013731703162193	-6.257873028516769E-4	0.06886617094278336	-0.10410422086715698	-0.003014305140823126	0.06273435056209564	-0.12407802790403366	-0.001108018564991653	0.017322760075330734	0.13896611332893372	-0.011679700575768948	0.03381441906094551	0.13837319612503052	0.011836384423077106	0.03428168594837189	-0.004122555255889893	-0.04379842430353165	0.04076431319117546	-0.002158721908926964	0.04340565949678421	0.043001316487789154	-0.1245487779378891	-0.026381881907582283	0.0477505698800087	-0.12499801069498062	0.022411491721868515	0.049087848514318466	0.24719439446926117	-0.015572505071759224	0.02028588205575943	0.22437255084514618	-0.015304389409720898	0.020632285624742508	0.07481144368648529	-0.047693442553281784	0.029687264934182167	0.03358740359544754	-0.06940554082393646	0.017602944746613503	-0.0016624005511403084	-0.03891633078455925	0.00283172819763422	-0.014577856287360191
Dasypus nov 93-1-1-17	0.26905977725982666	0.002842650515958667	0.021301941946148872	0.130427286028862	0.001522081671282649	0.03579547256231308	-0.03901446983218193	-9.522504988126457E-4	0.0691046416759491	-0.10972662270069122	-5.823291721753776E-4	0.05932612717151642	-0.12492655962705612	-4.669252084568143E-4	0.015295200049877167	0.12648800015449524	-0.007597890682518482	0.0356561653316021	0.12717393040657043	0.009483268484473228	0.03608269616961479	-0.0037797221448272467	-0.0482276976108551	0.03824499621987343	-7.041211356408894E-4	0.04764948785305023	0.03781149536371231	-0.1303003430366516	-0.023763978853821754	0.043819326907396317	-0.1317601054906845	0.023245852440595627	0.043739303946495056	0.2498885840177536	-0.014699780382215977	0.015774598345160484	0.22621743381023407	-0.011833017691969872	0.01826583966612816	0.07239886373281479	-0.051754940301179886	0.031201958656311035	0.03211979940533638	-0.06612107157707214	0.0197300985455513	-9.964759228751063E-4	-0.039399612694978714	0.00212933705188334	-0.015494835563004017
Dasypus nov 98-3-2-153	0.2669278383255005	0.0029414293821901083	0.012848886661231518	0.127426877617836	8.117876132018864E-4	0.04007132723927498	-0.047666411846876144	2.3001761292107403E-4	0.06886286288499832	-0.10310181230306625	-9.223093511536717E-4	0.0555424764752388	-0.12849682569503784	-4.923546221107244E-4	0.015372873283922672	0.12677942216396332	-0.012060971930623055	0.03849903494119644	0.12662801146507263	0.012627564370632172	0.03842328116297722	-0.013576555997133255	-0.04764629527926445	0.03396129235625267	-0.016570914536714554	0.04616144672036171	0.03799101710319519	-0.12754417955875397	-0.02743964083492756	0.03993212804198265	-0.1270606368780136	0.02567940205335617	0.040914613753557205	0.24889086186885834	-0.01600407063961029	0.011103924363851547	0.22759151458740234	-0.015626052394509315	0.010488571599125862	0.07021571695804596	-0.05393067002296448	0.03624104708433151	0.036282073706388474	-0.06971295922994614	0.025258608162403107	-0.0027821597177535295	-0.041714929044246674	0.005127163603901863	-0.014885198324918747
Dasypus nov 14-4-25-86	0.26253312826156616	0.003389820922166109	0.021031565964221954	0.12600618600845337	0.001527056097984314	0.03272486478090286	-0.03631070256233215	-9.152915445156395E-4	0.06911148130893707	-0.11033090949058533	-5.072266794741154E-4	0.059803325682878494	-0.13331811130046844	1.1263397755101323E-4	0.02181624248623848	0.13020959496498108	-0.008961440995335579	0.030802180990576744	0.12958282232284546	0.012962567619979382	0.030371760949492455	-0.0022993835154920816	-0.04565690457820892	0.04161008074879646	0.00197916803881526	0.04531959816813469	0.04077630117535591	-0.13581547141075134	-0.024690203368663788	0.04226348549127579	-0.13629300892353058	0.02306399680674076	0.04399120807647705	0.24614442884922028	-0.012686453759670258	0.01617121882736683	0.22737903892993927	-0.010342484340071678	0.017627554014325142	0.06284940242767334	-0.05469045042991638	0.03001541830599308	0.033007293939590454	-0.06941796094179153	0.020796723663806915	-0.008953530341386795	-0.0340881310403347	-0.0018176003359258175	-0.012372516095638275
Dasypus nov 98-10-3-23	0.2638539671897888	0.0023025711998343468	0.018611343577504158	0.12801069021224976	7.252821233123541E-4	0.03557466343045235	-0.04504930227994919	-5.26142364833504E-4	0.07356499880552292	-0.10976511240005493	4.7140420065261424E-4	0.05911984667181969	-0.12590806186199188	-9.599071345292032E-4	0.018324973061680794	0.12373310327529907	-0.011144598945975304	0.0343196839094162	0.12340974807739258	0.012362930923700333	0.034649837762117386	-0.003278682939708233	-0.05209491401910782	0.04149742051959038	-0.005707832518965006	0.05024047568440437	0.04301885887980461	-0.13025467097759247	-0.02375970408320427	0.03994504362344742	-0.13026513159275055	0.022939763963222504	0.041966963559389114	0.24634714424610138	-0.01595621183514595	0.013763031922280788	0.22555884718894958	-0.014533068053424358	0.014084204100072384	0.0743589848279953	-0.057120051234960556	0.03032376989722252	0.03279314562678337	-0.07436282932758331	0.027619628235697746	-0.002037224592640996	-0.0458441860973835	0.01508907787501812	-0.015564062632620335
Dasypus nov 521183	0.26291435956954956	0.0019483010983094573	0.021466491743922234	0.14095374941825867	-7.006801752140746E-5	0.027265645563602448	-0.043608374893665314	2.5832877145148814E-4	0.07033637911081314	-0.11196322739124298	-3.6908729816786945E-4	0.056861866265535355	-0.12985768914222717	-6.41825026832521E-4	0.025718940421938896	0.14266221225261688	-0.010199888609349728	0.024859579280018806	0.1424582302570343	0.012139546684920788	0.024798814207315445	-0.01626916602253914	-0.04831475391983986	0.036016758531332016	-0.018155664205551147	0.046765826642513275	0.03591711074113846	-0.134280264377594	-0.02493731491267681	0.04028280824422836	-0.1369866579771042	0.024406908079981804	0.03943624347448349	0.24917921423912048	-0.013588937930762768	0.016705946996808052	0.22531400620937347	-0.014313887804746628	0.015032658353447914	0.06989146769046783	-0.04688222333788872	0.032447315752506256	0.03417428582906723	-0.06458362936973572	0.024943729862570763	-0.0060926033183932304	-0.039959490299224854	0.01074166875332594	-0.019259851425886154
Dasypus nov 26-1-12-21	0.25574761629104614	0.002110606525093317	0.01969119720160961	0.15074270963668823	6.08563597779721E-4	0.03229381516575813	-0.04163636267185211	5.683613708242774E-4	0.07267970591783524	-0.11154911667108536	-9.123665513470769E-4	0.05672088637948036	-0.13319483399391174	-4.6297250082716346E-4	0.014675943180918694	0.13821576535701752	-0.012389998883008957	0.031899482011795044	0.13938969373703003	0.011342216283082962	0.03307822346687317	-6.320641259662807E-4	-0.04469835385680199	0.04300502687692642	-0.004913956858217716	0.04534907266497612	0.04275611415505409	-0.13235068321228027	-0.028431186452507973	0.036589376628398895	-0.13408412039279938	0.02465832233428955	0.03738312050700188	0.23737888038158417	-0.01667662151157856	0.014931656420230865	0.22325508296489716	-0.015017273835837841	0.016310958191752434	0.08313491940498352	-0.046701181679964066	0.03194038197398186	0.03958385810256004	-0.0681968405842781	0.019156552851200104	0.001864824560470879	-0.03869546204805374	0.010363939218223095	-0.01566881686449051
Dasypus nov 5-7-5-21	0.276568740606308	0.00306170666590333	0.02841886691749096	0.13254165649414062	0.001467101275920868	0.03558114543557167	-0.043935734778642654	-8.48019786644727E-4	0.06498950719833374	-0.10082791745662689	8.689186070114374E-4	0.06094235181808472	-0.1202424168586731	5.791233270429075E-4	0.02333979308605194	0.1332453340291977	-0.010536693967878819	0.032851941883563995	0.13240601122379303	0.013250425457954407	0.03231555223464966	-0.02046862058341503	-0.04762439429759979	0.03455325588583946	-0.019924543797969818	0.046468477696180344	0.034080639481544495	-0.12409874051809311	-0.022686265408992767	0.045646317303180695	-0.12238343060016632	0.024291517212986946	0.04712936282157898	0.2561561167240143	-0.015200722962617874	0.019498342648148537	0.2335098534822464	-0.014937154948711395	0.016201144084334373	0.06830320507287979	-0.05362941697239876	0.026341211050748825	0.033867716789245605	-0.06857956200838089	0.02015414461493492	-0.005481223110109568	-0.04312837868928909	0.009552321396768093	-0.018881378695368767
Dasypus nov 98-10-3-22	0.26269495487213135	0.004545408301055431	0.017288655042648315	0.13191242516040802	0.0025466899387538433	0.03522152453660965	-0.04283703491091728	4.8571135266683996E-4	0.06913765519857407	-0.10728154331445694	-2.268755779368803E-4	0.06305865943431854	-0.1289701610803604	-0.002184951677918434	0.018039414659142494	0.13130497932434082	-0.009893151000142097	0.033513493835926056	0.13099095225334167	0.013295655138790607	0.033565703779459	-0.009262191131711006	-0.050203558057546616	0.039037447422742844	-0.010774300433695316	0.04851585999131203	0.03605920821428299	-0.1306217461824417	-0.024292880669236183	0.04337207227945328	-0.13079436123371124	0.022928526625037193	0.04483906552195549	0.24559593200683594	-0.014196190051734447	0.014378383755683899	0.22873002290725708	-0.013852636329829693	0.0154289361089468	0.06556036323308945	-0.06062392145395279	0.024350695312023163	0.030305588617920876	-0.07242166996002197	0.021911509335041046	8.357250044355169E-5	-0.04344090074300766	0.0022888053208589554	-0.015674659982323647
[truncated: 203 more columns]
