# Supplementary material for: Beyond the carapace: skull shape variation and morphological systematics of long-nosed armadillos (genus Dasypus)
Source: PeerJ. 2017 Aug 15;5:e3650. doi: 10.7717/peerj.3650 (PMC5562145; doi:10.7717/peerj.3650)
Supplement: Supplemental Information 12 — Procrustres coordinates of mandibles used in the interspecific comparisons. [file peerj-05-3650-s012.xlsx]

## Sheet: Feuil1
.	1	1	1	2	2	2	3	3	3	4	4	4	5	5	5	6	6	6	7	7	7	8	8	8	9	9	9	10	10	10	genus	species	sex	distribution	Log(centroid size)	centroid size
Dasypus kap 98812	0.6606744527816772	-0.025676213204860687	-0.0834382101893425	0.4487478733062744	-0.013869570568203926	-0.0745120719075203	0.17551551759243011	0.0075650447979569435	-0.08212462812662125	-0.18895679712295532	-0.019762221723794937	0.16914674639701843	-0.14415088295936584	0.0022366398479789495	0.03793680667877197	-0.23406696319580078	-0.020396139472723007	0.050031937658786774	-0.22655412554740906	0.013095291331410408	0.008323130197823048	-0.24226893484592438	0.0262154471129179	-0.01879449002444744	-0.028742680326104164	0.008775156922638416	-0.05493610352277756	-0.22019745409488678	0.021816566586494446	0.04836687818169594	Dasypus	kappleri	male	Peru	2.0037052207694894	100.85680838114465
Dasypus kap 76933	0.6510595679283142	-0.026942439377307892	-0.07808573544025421	0.45778825879096985	-0.009041297249495983	-0.06814149767160416	0.18414698541164398	0.008183659985661507	-0.09258969873189926	-0.19451838731765747	-0.026695113629102707	0.1613544225692749	-0.14541083574295044	0.0023873993195593357	0.03745367377996445	-0.2262071967124939	-0.01849265769124031	0.06148640066385269	-0.2291245013475418	0.014990586787462234	0.011129184626042843	-0.24545647203922272	0.02775525487959385	-0.0057967426255345345	-0.039151836186647415	-3.0554362456314266E-4	-0.07671163976192474	-0.21312560141086578	0.028160151094198227	0.04990164190530777	Dasypus	kappleri	female	Venezuela	2.0528279769372246	112.93484936814093
Dasypus kap 136251	0.6534475088119507	-0.024439113214612007	-0.08239493519067764	0.4545781910419464	-0.01601061038672924	-0.06927356123924255	0.1914851814508438	0.006819847971200943	-0.08643043041229248	-0.1863868534564972	-0.018817340955138206	0.1590745747089386	-0.1479456126689911	5.975693347863853E-4	0.03131001815199852	-0.2307502031326294	-0.016991760581731796	0.05795077607035637	-0.22642852365970612	0.012353792786598206	0.01645052619278431	-0.24184411764144897	0.02471216768026352	-0.012566899880766869	-0.042393166571855545	0.01240349467843771	-0.06244221702218056	-0.2237623631954193	0.01937195286154747	0.048322152346372604	Dasypus	kappleri	female	Colombia	2.0488673652727853	111.90960562640423
Dasypus kap 107299	0.6569748520851135	-0.024629654362797737	-0.06878823786973953	0.4451872408390045	-0.01378108374774456	-0.0741342306137085	0.19310835003852844	0.003983164671808481	-0.09933404624462128	-0.17926301062107086	-0.024952232837677002	0.1584305465221405	-0.14345087110996246	0.005744121503084898	0.03297494724392891	-0.22980836033821106	-0.019347477704286575	0.06180555745959282	-0.23472636938095093	0.013089646585285664	0.022821763530373573	-0.2519463896751404	0.0278764795511961	-0.01265315618366003	-0.04345566779375076	0.009710230864584446	-0.07105166465044022	-0.21261978149414062	0.022306805476546288	0.04992852360010147	Dasypus	kappleri	male	Guyana	2.0441200928443153	110.6929834318448
Dasypus kap 108922	0.6276917457580566	-0.017250865697860718	-0.07648289203643799	0.46766141057014465	-0.018865916877985	-0.07528670877218246	0.20622193813323975	0.0033008239697664976	-0.08864670246839523	-0.198479562997818	-0.023417888209223747	0.1590910255908966	-0.13613373041152954	-0.0028276669327169657	0.03721408545970917	-0.24000170826911926	-0.013689763844013214	0.055366288870573044	-0.2362040877342224	0.014489058405160904	0.023102929815649986	-0.2544776201248169	0.02656203880906105	-0.0044927108101546764	-0.022146420553326607	0.006035974249243736	-0.08272609114646912	-0.21413201093673706	0.025664206594228745	0.05286077409982681	Dasypus	kappleri	female	Guyana	2.0445938906446446	110.81381091859069
Dasypus kwata	0.6558172702789307	-0.02646881528198719	-0.08040782809257507	0.4554252624511719	-0.01361201424151659	-0.06973489373922348	0.17994506657123566	0.010252595879137516	-0.07903153449296951	-0.18523558974266052	-0.020411040633916855	0.15955761075019836	-0.14831213653087616	-0.001057561719790101	0.025624817237257957	-0.22645319998264313	-0.018123405054211617	0.05473063141107559	-0.2336740642786026	0.015058844350278378	0.011379403062164783	-0.25191575288772583	0.021668069064617157	0.0018199289916083217	-0.03331160172820091	0.006044579669833183	-0.07520369440317154	-0.21228526532649994	0.0266487468034029	0.05126556381583214	Dasypus	kappleri	unknown	French Guiana	2.066682290294163	116.59563453921437
Dasypus kap 388210	0.6420446038246155	-0.021720366552472115	-0.07222753763198853	0.46354708075523376	-0.017091350629925728	-0.07363734394311905	0.1889222115278244	0.0024171106051653624	-0.09433335810899734	-0.17011144757270813	-0.025827497243881226	0.15869687497615814	-0.1454997956752777	0.002296369755640626	0.03503105416893959	-0.2349018156528473	-0.01640499383211136	0.05750665068626404	-0.2397395372390747	0.013777312822639942	0.014019779860973358	-0.2490062415599823	0.022096063941717148	-0.012227624654769897	-0.0305137000977993	0.011733876541256905	-0.06953370571136475	-0.2247413545846939	0.028723472729325294	0.056705210357904434	Dasypus	kappleri	female	Venezuela	2.0304166173497653	107.25477035751987
Dasypus kap 9271	0.6581781506538391	-0.025478685274720192	-0.07086414843797684	0.4550197720527649	-0.012670210562646389	-0.0831674262881279	0.18324428796768188	0.003319692565128207	-0.08898970484733582	-0.1825835257768631	-0.016455242410302162	0.14470429718494415	-0.15270712971687317	0.004565162118524313	0.04088931158185005	-0.23302800953388214	-0.028730906546115875	0.05640608072280884	-0.22737310826778412	0.018238479271531105	0.011034187860786915	-0.24459609389305115	0.02680504322052002	-0.00221428950317204	-0.039646632969379425	0.009497513994574547	-0.058326080441474915	-0.216507688164711	0.020909154787659645	0.050527773797512054	Dasypus	kappleri	unknown	Peru	2.028381463718912	106.7533380345782
Dasypus kap 20962	0.6513292789459229	-0.025440750643610954	-0.07706989347934723	0.4465506374835968	-0.010916139930486679	-0.0744110569357872	0.19549424946308136	0.0039643216878175735	-0.08913181722164154	-0.1878647357225418	-0.016668718308210373	0.16364672780036926	-0.13849766552448273	-0.0032961289398372173	0.03286127746105194	-0.23420503735542297	-0.025560231879353523	0.05243362858891487	-0.23078899085521698	0.01862202398478985	0.01490660011768341	-0.25485125184059143	0.03153934329748154	-0.006930351257324219	-0.02645735628902912	0.008261816576123238	-0.06833953410387039	-0.22070913016796112	0.019494466483592987	0.052034422755241394	Dasypus	kappleri	male	Suriname	2.0464197256842342	111.2806684336254
Dasypus kap 14-4-25-87	0.6584495306015015	-0.02451695129275322	-0.08190230280160904	0.45460543036460876	-0.020217111334204674	-0.0704149454832077	0.16913220286369324	0.011826788075268269	-0.08968392014503479	-0.19386117160320282	-0.013798598200082779	0.17063412070274353	-0.14070434868335724	-0.001702766166999936	0.0415346696972847	-0.2287384420633316	-0.027791794389486313	0.05019982159137726	-0.2217705398797989	0.01522778905928135	0.009448660537600517	-0.24358083307743073	0.026150645688176155	-0.018101416528224945	-0.033284176141023636	0.01628340780735016	-0.0612853467464447	-0.22024765610694885	0.018538592383265495	0.049570661038160324	Dasypus	kappleri	male	Ecuador	2.0237717663293284	105.62622685151356
Dasypus kap 80-5-6-71	0.6609261631965637	-0.0239067655056715	-0.082131028175354	0.4466034173965454	-0.0132939787581563	-0.07302428781986237	0.18780814111232758	0.007400987204164267	-0.08692877739667892	-0.1975112110376358	-0.018398037180304527	0.16055601835250854	-0.1450066715478897	-0.0057306750677526	0.03555816784501076	-0.23081421852111816	-0.017846273258328438	0.055470697581768036	-0.2270282804965973	0.016058597713708878	0.011646011844277382	-0.23830564320087433	0.03123406134545803	-0.01567283645272255	-0.042947664856910706	0.004525733180344105	-0.05745379999279976	-0.2137240320444107	0.019956352189183235	0.05197984352707863	Dasypus	kappleri	unknown	Ecuador	2.0360025998157054	108.64321273028615
Dasypus nov 32356	0.6795843839645386	-0.03536257520318031	-0.07751689851284027	0.43506431579589844	-0.008272732608020306	-0.06930813938379288	0.15126825869083405	0.016776470467448235	-0.08004890382289886	-0.1764346957206726	-0.018988030031323433	0.17256811261177063	-0.1439104974269867	-1.3593204494100064E-4	0.03132503107190132	-0.227873295545578	-0.02724904753267765	0.0637933760881424	-0.22422157227993011	0.015544447116553783	0.0056348866783082485	-0.24186424911022186	0.024762919172644615	-0.018436886370182037	-0.03461265191435814	0.010696498677134514	-0.07801295071840286	-0.21700003743171692	0.02222798578441143	0.05000237002968788	Dasypus	novemcinctus	male	Colombia	1.8825905563380476	76.31159946931166
Dasypus nov 37356	0.6641179919242859	-0.03355449065566063	-0.07202553749084473	0.4501490890979767	-0.0077214608900249004	-0.0716547966003418	0.14654716849327087	0.010129577480256557	-0.0870041623711586	-0.1584700345993042	-0.01898255944252014	0.15602941811084747	-0.14312653243541718	-0.0011072041234001517	0.0370548851788044	-0.2395806610584259	-0.027388405054807663	0.06551401317119598	-0.2309846132993698	0.017306428402662277	0.006971554830670357	-0.2524723410606384	0.02266932837665081	-0.018563654273748398	-0.0072204372845590115	0.013191906735301018	-0.0781807005405426	-0.2289596050977707	0.025456877425312996	0.06185897812247276	Dasypus	novemcinctus	unknown	Colombia	1.8827051764133256	76.33174247362285
Dasypus nov 133329	0.6809837818145752	-0.03463686257600784	-0.07593857496976852	0.4378751218318939	-0.008622671477496624	-0.06965687870979309	0.14325879514217377	0.008863202296197414	-0.08639070391654968	-0.1825960874557495	-0.02259339578449726	0.17021192610263824	-0.12288644164800644	0.00950536597520113	0.020020265132188797	-0.22843049466609955	-0.023647231981158257	0.059341128915548325	-0.22013895213603973	0.014856623485684395	0.0029288402292877436	-0.2492310106754303	0.01134413294494152	-0.013335449621081352	-0.03801476210355759	0.0184469036757946	-0.0648452416062355	-0.22081996500492096	0.026483934372663498	0.057664692401885986	Dasypus	novemcinctus	male	Brazil	1.9205979192397393	83.29096987851364
Dasypus nov 14663	0.6711552143096924	-0.03309470787644386	-0.07713501155376434	0.44547098875045776	-0.010357056744396687	-0.07417796552181244	0.16421158611774445	0.014663606882095337	-0.0810200497508049	-0.1698664128780365	-0.014889681711792946	0.1584058701992035	-0.1446099579334259	-0.0026502313558012247	0.03391382470726967	-0.22962714731693268	-0.022297006100416183	0.048428330570459366	-0.22713814675807953	0.0186736062169075	0.0054495385847985744	-0.24736462533473969	0.018314072862267494	-0.002427881583571434	-0.035501379519701004	0.010371357202529907	-0.06096791476011276	-0.2267301082611084	0.021266041323542595	0.04953126236796379	Dasypus	novemcinctus	unknown	Colombia	1.8915047073016005	77.89412574229898
Dasypus nov 40984	0.6704736948013306	-0.030829302966594696	-0.08334279805421829	0.4384855628013611	-0.0083678113296628	-0.07045461982488632	0.16992788016796112	0.013422503136098385	-0.08014499396085739	-0.18814599514007568	-0.019203808158636093	0.16274933516979218	-0.15087388455867767	-3.645374672487378E-4	0.04020741209387779	-0.2349088340997696	-0.020923828706145287	0.05050567910075188	-0.22747880220413208	0.015934260562062263	0.010082436725497246	-0.23191432654857635	0.022722652181982994	-0.01291266642510891	-0.024930212646722794	0.002276156097650528	-0.07285698503255844	-0.2206350862979889	0.025333717465400696	0.05616720765829086	Dasypus	novemcinctus	male	Ecuador	1.9214403891454725	83.45269940207693
Dasypus nov 42883	0.6607697010040283	-0.035709500312805176	-0.07730747014284134	0.44188082218170166	-0.005878548137843609	-0.07241859287023544	0.17094486951828003	0.01750413328409195	-0.08674152195453644	-0.19506719708442688	-0.016767777502536774	0.17046557366847992	-0.13646946847438812	-0.0022466545924544334	0.021649345755577087	-0.2425573319196701	-0.020356053486466408	0.05723327770829201	-0.22921566665172577	0.010673203505575657	0.018165623769164085	-0.23834554851055145	0.017811231315135956	-0.0032204792369157076	-0.010553414933383465	0.010797224007546902	-0.08172672241926193	-0.22138676047325134	0.024172745645046234	0.05390096828341484	Dasypus	novemcinctus	female	Guyana	1.8721583967882587	74.5003643642068
Dasypus nov 75896	0.6738623976707458	-0.02737308293581009	-0.07170706242322922	0.4484659731388092	-0.014210761524736881	-0.07173515111207962	0.14973294734954834	0.011419045738875866	-0.08871027082204819	-0.17575231194496155	-0.029559962451457977	0.16746126115322113	-0.13828223943710327	0.005616635549813509	0.024892838671803474	-0.23372286558151245	-0.012686831876635551	0.058119650930166245	-0.22395092248916626	0.019162088632583618	0.010454810224473476	-0.2451823353767395	0.015949441120028496	-0.008510153740644455	-0.045284204185009	0.005058843642473221	-0.07042387127876282	-0.20988644659519196	0.026624584570527077	0.05015795677900314	Dasypus	novemcinctus	female	Brazil	1.9331217663052536	85.72781728593066
Dasypus nov 136252	0.6772198677062988	-0.030368106439709663	-0.0749007984995842	0.42742639780044556	-0.011399207636713982	-0.07446512579917908	0.17422351241111755	0.012559456750750542	-0.08315907418727875	-0.179935485124588	-0.023535020649433136	0.17113277316093445	-0.1410723179578781	2.1228072000667453E-4	0.027462206780910492	-0.2281322181224823	-0.022234918549656868	0.056544236838817596	-0.22337228059768677	0.018521681427955627	0.005188673734664917	-0.23966048657894135	0.01766733080148697	-0.004910609219223261	-0.03866793215274811	0.008427811786532402	-0.07334892451763153	-0.2280290424823761	0.030148692429065704	0.05045664682984352	Dasypus	novemcinctus	male	Colombia	1.909278336968525	81.14809649647975
Dasypus nov 211668	0.6739588975906372	-0.028516992926597595	-0.07300539314746857	0.44251683354377747	-0.012826647609472275	-0.07112500816583633	0.15661250054836273	0.011606615036725998	-0.08281412720680237	-0.16552770137786865	-0.022198257967829704	0.15125703811645508	-0.14112168550491333	0.0031360210850834846	0.038459133356809616	-0.23123937845230103	-0.026366978883743286	0.06035681068897247	-0.23214171826839447	0.014423360116779804	0.006506230216473341	-0.25541016459465027	0.0272808987647295	-0.014792118221521378	-0.035920917987823486	0.0033272462897002697	-0.07670774310827255	-0.21172668039798737	0.030134735628962517	0.0618651807308197	Dasypus	novemcinctus	female	Bolivia	1.8757676566432442	75.12208905668473
Dasypus nov 211665	0.6733449697494507	-0.039214979857206345	-0.06930695474147797	0.4434642195701599	-0.002927941968664527	-0.0733504444360733	0.16256210207939148	0.01126270741224289	-0.09151379019021988	-0.1656009703874588	-0.02206491492688656	0.15315066277980804	-0.14082013070583344	0.007069634273648262	0.04270024970173836	-0.22760115563869476	-0.022724736481904984	0.05867741256952286	-0.2250545471906662	0.013575942255556583	0.01044350303709507	-0.24595053493976593	0.011911220848560333	-0.014162332750856876	-0.04831872880458832	0.015125196427106857	-0.07198715209960938	-0.22602520883083344	0.027987873181700706	0.055348850786685944	Dasypus	novemcinctus	male	Bolivia	1.8847766584835808	76.6966965311343
Dasypus nov 211673	0.6586541533470154	-0.03590431809425354	-0.08092796057462692	0.46812903881073	-0.007186627481132746	-0.07279909402132034	0.154056116938591	0.019802695140242577	-0.07538579404354095	-0.18092668056488037	-0.02319606952369213	0.16315142810344696	-0.14192485809326172	3.5867776023223996E-4	0.03871547058224678	-0.2328699678182602	-0.014147361740469933	0.062186673283576965	-0.2210077941417694	0.010799488052725792	0.0051158517599105835	-0.245761901140213	0.015673289075493813	-0.0244874469935894	-0.04768170043826103	0.006113315001130104	-0.06432153284549713	-0.21066638827323914	0.027686910703778267	0.048752401024103165	Dasypus	novemcinctus	female	Bolivia	1.8927295949191194	78.11412905897225
Dasypus nov 247661	0.6611673831939697	-0.025537488982081413	-0.07940114289522171	0.44901570677757263	-0.013662099838256836	-0.07414741814136505	0.16249918937683105	0.01047236006706953	-0.07881142944097519	-0.17964290082454681	-0.026271671056747437	0.16668124496936798	-0.14331072568893433	0.004309273790568113	0.04078557342290878	-0.24211901426315308	-0.016328228637576103	0.05653229355812073	-0.22480733692646027	0.01761060208082199	0.0059712110087275505	-0.23326171934604645	0.02279009483754635	-0.013674226589500904	-0.015797320753335953	0.0010754886316135526	-0.07904630899429321	-0.23374323546886444	0.025541670620441437	0.05511021614074707	Dasypus	novemcinctus	male	Bolivia	1.878996738050978	75.6827210534633
Dasypus nov 262658	0.6630511283874512	-0.034852348268032074	-0.06909722834825516	0.454184889793396	-0.008698763325810432	-0.06626027077436447	0.15171560645103455	0.015217306092381477	-0.09406308829784393	-0.1738756150007248	-0.018507003784179688	0.1747136265039444	-0.1430370956659317	-0.003947595600038767	0.020653842017054558	-0.2224837988615036	-0.028049953281879425	0.05634729936718941	-0.22614845633506775	0.017553161829710007	0.018088867887854576	-0.250363290309906	0.0222385972738266	-0.005977666471153498	-0.0346950888633728	0.013774416409432888	-0.09059809148311615	-0.21834827959537506	0.025272181257605553	0.05619271472096443	Dasypus	novemcinctus	unknown	Bolivia	1.904300612581285	80.22331658534186
Dasypus nov 263287	0.6758021712303162	-0.03157211095094681	-0.08103393763303757	0.44494131207466125	-0.012050013057887554	-0.0750226154923439	0.1627788096666336	0.015903133898973465	-0.07757119089365005	-0.1879076361656189	-0.02460293658077717	0.1531628668308258	-0.1373785436153412	0.011406444944441319	0.037978291511535645	-0.22895824909210205	-0.01658439077436924	0.05766976252198219	-0.21745146811008453	0.010634077712893486	0.008509278297424316	-0.23880118131637573	0.012671628966927528	-0.013522908091545105	-0.05013919249176979	0.004494738765060902	-0.056983623653650284	-0.22288604080677032	0.029699428007006645	0.046814072877168655	Dasypus	novemcinctus	male	Bolivia	1.9220887959956112	83.5773883371938
Dasypus nov 205726	0.6873640418052673	-0.03236968070268631	-0.07168887555599213	0.437369704246521	-0.013015063479542732	-0.06515602767467499	0.14323890209197998	0.011513039469718933	-0.08739801496267319	-0.16112463176250458	-0.020832190290093422	0.14083433151245117	-0.1289321631193161	0.008657344616949558	0.017610125243663788	-0.2332904189825058	-0.018593713641166687	0.06389700621366501	-0.22375763952732086	0.012947874143719673	0.018020829185843468	-0.2452293485403061	0.012320287525653839	-0.005654352717101574	-0.048187073320150375	0.013928095810115337	-0.07387647777795792	-0.227451354265213	0.02544400840997696	0.06341146677732468	Dasypus	novemcinctus	male	Uruguay	1.9326419175138791	85.6331495571319
Dasypus nov 133265	0.6784403324127197	-0.031385958194732666	-0.07626502960920334	0.44032052159309387	-0.01209103874862194	-0.07067154347896576	0.1550682783126831	0.011538035236299038	-0.08157217502593994	-0.16263875365257263	-0.022378679364919662	0.1602228581905365	-0.14729847013950348	0.003067352343350649	0.043543923646211624	-0.22876302897930145	-0.0204961895942688	0.061224598437547684	-0.21896237134933472	0.015169119462370872	3.922877658624202E-4	-0.24947313964366913	0.02094823122024536	-0.020537516102194786	-0.045033443719148636	0.012301336042582989	-0.06763245910406113	-0.22165992856025696	0.023327792063355446	0.05129506066441536	Dasypus	novemcinctus	female	Brazil	1.8746349424546782	74.92641310625561
Dasypus nov 93116	0.684085488319397	-0.03231263533234596	-0.06395477056503296	0.42648881673812866	-0.010207411833107471	-0.07421694695949554	0.15378277003765106	0.010694985277950764	-0.09661988914012909	-0.15348689258098602	-0.021060166880488396	0.14083437621593475	-0.13610681891441345	0.005747810006141663	0.028712144121527672	-0.24340243637561798	-0.024548649787902832	0.0694923922419548	-0.23317866027355194	0.01857232302427292	0.020294370129704475	-0.24865254759788513	0.02022547461092472	-0.009309858083724976	-0.02242644689977169	0.010315968655049801	-0.07137299329042435	-0.22710326313972473	0.02257230132818222	0.05614118650555611	Dasypus	novemcinctus	male	Brazil	1.8917695146888167	77.94163550953408
Dasypus nov 93735	0.6789675951004028	-0.03367498889565468	-0.07863020151853561	0.44378983974456787	-0.009284686297178268	-0.07361838221549988	0.14201928675174713	0.010143262334167957	-0.0815543681383133	-0.18529430031776428	-0.018879402428865433	0.17001156508922577	-0.1376543641090393	0.007627704180777073	0.03806708753108978	-0.224068745970726	-0.025232188403606415	0.050082746893167496	-0.21859292685985565	0.012886041775345802	0.0065832482650876045	-0.24293091893196106	0.019829651340842247	-0.014790443703532219	-0.03425072878599167	0.015099785290658474	-0.06291835010051727	-0.22198469936847687	0.021484822034835815	0.046767108142375946	Dasypus	novemcinctus	male	Brazil	1.9066163515842738	80.65222473233764
Dasypus nov 365	0.6707091331481934	-0.025882670655846596	-0.08009420335292816	0.4358823001384735	-0.009494835510849953	-0.0708201453089714	0.16540886461734772	0.0012860087445005774	-0.07593107968568802	-0.1715438961982727	-0.02848256379365921	0.1645275056362152	-0.14578455686569214	0.0011595351388677955	0.04521869122982025	-0.23184210062026978	-0.02061530202627182	0.057260967791080475	-0.2253585159778595	0.01901019923388958	0.008260774426162243	-0.25110065937042236	0.02533721551299095	-0.01844487152993679	-0.020611818879842758	0.004921020474284887	-0.08051668107509613	-0.22575876116752625	0.03276139497756958	0.0505390539765358	Dasypus	novemcinctus	unknown	Brazil	1.9083381673699644	80.97261544446425
Dasypus nov 133330	0.6709592938423157	-0.027637021616101265	-0.07373316586017609	0.4352700412273407	-0.013112708926200867	-0.07267848402261734	0.15990933775901794	0.0068818191066384315	-0.08792604506015778	-0.16961008310317993	-0.02568349614739418	0.16082903742790222	-0.1414973884820938	0.0024785688146948814	0.034015871584415436	-0.2432599812746048	-0.014222381636500359	0.05742626637220383	-0.22757908701896667	0.015201050788164139	0.010932374745607376	-0.25503838062286377	0.01339752972126007	-0.011532069183886051	-0.008398973383009434	0.01338313240557909	-0.07463905960321426	-0.22075478732585907	0.029313508421182632	0.057305268943309784	Dasypus	novemcinctus	female	Brazil	1.9298945787504425	85.09314568392728
Dasypus nov 133341	0.6809353232383728	-0.031924571841955185	-0.07551376521587372	0.43531638383865356	-0.011091114953160286	-0.07087575644254684	0.15069566667079926	0.013214793987572193	-0.08789647370576859	-0.18593646585941315	-0.020389167591929436	0.16568557918071747	-0.14307591319084167	0.002688436536118388	0.02866140939295292	-0.22848856449127197	-0.023138636723160744	0.05739995464682579	-0.2219943255186081	0.01616746373474598	0.015248850919306278	-0.2403896450996399	0.01824459806084633	-0.011819670908153057	-0.030579203739762306	0.011568458750844002	-0.07280460745096207	-0.21648329496383667	0.024659741669893265	0.05191448703408241	Dasypus	novemcinctus	male	Brazil	1.9220838043249664	83.57642772540667
Dasypus nov 133342	0.6779988408088684	-0.03654583916068077	-0.07298345863819122	0.4404350817203522	-0.008546999655663967	-0.07223058491945267	0.13934031128883362	0.017522724345326424	-0.08815810084342957	-0.1809769719839096	-0.021611854434013367	0.16529738903045654	-0.14476639032363892	0.008057203143835068	0.04150323197245598	-0.2248731255531311	-0.024487094953656197	0.05758146569132805	-0.2251938432455063	0.011505385860800743	0.010164204984903336	-0.25179412961006165	0.01624518819153309	-0.014216887764632702	-0.019287865608930588	0.011767408810555935	-0.07780751585960388	-0.21088188886642456	0.026093877851963043	0.05085025355219841	Dasypus	novemcinctus	male	Brazil	1.9139574405957966	82.02711565658397
Dasypus nov 133397	0.6769848465919495	-0.034291334450244904	-0.07819058001041412	0.4467927813529968	-0.006559506990015507	-0.0673755556344986	0.15158328413963318	0.01354250404983759	-0.08202778548002243	-0.16272501647472382	-0.024843234568834305	0.1562659740447998	-0.13354210555553436	8.085278677754104E-4	0.029989708214998245	-0.23875753581523895	-0.015339814126491547	0.05941237881779671	-0.22595323622226715	0.013755770400166512	0.01338941976428032	-0.2382739633321762	0.01861647516489029	-0.017425257712602615	-0.05110742896795273	0.004713647998869419	-0.06271521002054214	-0.22500164806842804	0.0295969657599926	0.04867691174149513	Dasypus	novemcinctus	male	Brazil	1.9153810766275754	82.29644527332576
Dasypus nov 205727	0.6830533742904663	-0.03411054238677025	-0.07709256559610367	0.42763373255729675	-0.00981728546321392	-0.07244306057691574	0.16142329573631287	0.014548970386385918	-0.08788009732961655	-0.19495435059070587	-0.016682690009474754	0.15991725027561188	-0.1390373706817627	0.007791770622134209	0.036465149372816086	-0.23348455131053925	-0.022704478353261948	0.05658935755491257	-0.2237716019153595	0.009935916401445866	0.0186932273209095	-0.23444229364395142	0.017432549968361855	-0.014975315891206264	-0.03301052749156952	0.014470921829342842	-0.07249638438224792	-0.2134096920490265	0.019134866073727608	0.05322244018316269	Dasypus	novemcinctus	female	Uruguay	1.954854934594703	90.1270040200152
Dasypus nov 616093	0.6740665435791016	-0.03585642948746681	-0.07857213914394379	0.44032397866249084	-0.010397997684776783	-0.06409310549497604	0.1532270610332489	0.017579399049282074	-0.08864273875951767	-0.19084656238555908	-0.021235104650259018	0.1670074164867401	-0.1440403163433075	0.011470261961221695	0.030944427475333214	-0.22898328304290771	-0.024181487038731575	0.06345660239458084	-0.2225033938884735	0.008368347771465778	0.018684308975934982	-0.24789710342884064	0.012220988981425762	-0.01287804264575243	-0.02813727594912052	0.01653904840350151	-0.08359059691429138	-0.2052096277475357	0.025492973625659943	0.04768387973308563	Dasypus	novemcinctus	unknown	Mexico	1.9082445425923231	80.9551613290341
Dasypus nov 964067	0.6630280017852783	-0.03538971021771431	-0.07800991833209991	0.4532853066921234	-0.007740139961242676	-0.07118354737758636	0.16655327379703522	0.016249345615506172	-0.08299633860588074	-0.17793843150138855	-0.0228914562612772	0.16776742041110992	-0.14563781023025513	0.005334808025509119	0.029677733778953552	-0.2253585308790207	-0.020060354843735695	0.05142907798290253	-0.22892220318317413	0.018359564244747162	0.016259465366601944	-0.23939093947410583	0.009712094441056252	-0.009893440641462803	-0.03908434510231018	0.008221510797739029	-0.06984466314315796	-0.22653430700302124	0.028204336762428284	0.04679422080516815	Dasypus	novemcinctus	unknown	Brazil	1.9200291556788422	83.18196121331835
Dasypus nov 1996-587	0.6615333557128906	-0.031446490436792374	-0.07248717546463013	0.4332217574119568	-0.007639440707862377	-0.08172179758548737	0.17473119497299194	0.010862044058740139	-0.09118320047855377	-0.2034657746553421	-0.020322158932685852	0.17286762595176697	-0.13824160397052765	-0.005463241133838892	0.03198934718966484	-0.2378147542476654	-0.015360197983682156	0.05970635637640953	-0.2182510942220688	0.016093792393803596	0.011300557292997837	-0.24437086284160614	0.016439588740468025	-0.013020921498537064	4.483587326831184E-5	0.013828475028276443	-0.07865075021982193	-0.22738707065582275	0.023007631301879883	0.061199963092803955	Dasypus	novemcinctus	unknown	French Guiana	1.9646311178915021	92.17881438817321
Dasypus nov 1999-1069	0.6730479001998901	-0.030977491289377213	-0.0793703943490982	0.42893606424331665	-0.011035071685910225	-0.07435767352581024	0.18291941285133362	0.012593976221978664	-0.08416326344013214	-0.19309547543525696	-0.02533906139433384	0.1803601086139679	-0.1471860110759735	0.00433631706982851	0.023789484053850174	-0.22602859139442444	-0.014621335081756115	0.0567639134824276	-0.22055596113204956	0.014442415907979012	0.009772074408829212	-0.23271594941616058	0.01261997688561678	-0.021472372114658356	-0.044501036405563354	0.012054188176989555	-0.0640907883644104	-0.2208203673362732	0.02592608518898487	0.05276891589164734	Dasypus	novemcinctus	male	French Guiana	1.9438280930601206	87.8674641888379
Dasypus nov 2000-1050	0.670471727848053	-0.02887682430446148	-0.07406102120876312	0.43223831057548523	-0.010767987929284573	-0.07273044437170029	0.1640566736459732	0.006798977963626385	-0.09038446098566055	-0.17618411779403687	-0.023502103984355927	0.16783900558948517	-0.13949203491210938	0.007850535213947296	0.031703826040029526	-0.24084816873073578	-0.019513901323080063	0.059235986322164536	-0.2235882580280304	0.016475768759846687	0.011311959475278854	-0.24912865459918976	0.022702345624566078	-0.014507025480270386	-0.009711544960737228	0.010325544513761997	-0.07554920762777328	-0.22781391441822052	0.018507646396756172	0.05714138224720955	Dasypus	novemcinctus	male	French Guiana	1.9567915210733544	90.52979169372439
Dasypus nov 2006-565	0.6669263243675232	-0.028960132971405983	-0.07423371821641922	0.4452667236328125	-0.015456762164831161	-0.07208845019340515	0.16726024448871613	0.012879159301519394	-0.08387541770935059	-0.1706840991973877	-0.02177583798766136	0.16373229026794434	-0.13604587316513062	0.0027325483970344067	0.03994588553905487	-0.2301505208015442	-0.02133437804877758	0.054783403873443604	-0.22559519112110138	0.013967937789857388	0.009115328080952168	-0.2534739673137665	0.01896122843027115	-0.015486677177250385	-0.04054396599531174	0.012353726662695408	-0.0763525515794754	-0.22295968234539032	0.026632511988282204	0.05445991829037666	Dasypus	novemcinctus	unknown	Brazil	1.9277295394344824	84.66999603506746
Dasypus nov 2007-371	0.6667412519454956	-0.033336129039525986	-0.08639027923345566	0.4397123157978058	-6.939930026419461E-4	-0.06493204832077026	0.17507565021514893	0.006293889135122299	-0.08188100904226303	-0.17397983372211456	-0.024292444810271263	0.1781187355518341	-0.14158399403095245	-0.001482358667999506	0.04056652635335922	-0.23985382914543152	-0.011660631746053696	0.0563332699239254	-0.22263607382774353	0.018496811389923096	6.605734815821052E-4	-0.23451678454875946	0.030852792784571648	-0.028008125722408295	-0.04137452691793442	0.003037616377696395	-0.06369742006063461	-0.22758415341377258	0.012784448452293873	0.04922977834939957	Dasypus	novemcinctus	unknown	USA	1.9208356643710753	83.33657820300803
Dasypus nov 2007-372	0.6600350141525269	-0.031533826142549515	-0.09325319528579712	0.4438863694667816	-0.00891363900154829	-0.06742195039987564	0.1706271469593048	0.017140110954642296	-0.07903741300106049	-0.20076815783977509	-0.014348074793815613	0.18250562250614166	-0.1399916261434555	-0.005691527854651213	0.04738474637269974	-0.2333250343799591	-0.01870858296751976	0.04502197727560997	-0.2261212021112442	0.015891991555690765	0.006090496201068163	-0.22760283946990967	0.02950250916182995	-0.025107702240347862	-0.014963607303798199	0.004594226833432913	-0.062256425619125366	-0.23177604377269745	0.012066813185811043	0.04607383906841278	Dasypus	novemcinctus	unknown	Mexico	1.9140215125159967	82.03921809566928
Dasypus nov 2001-1317	0.6514108180999756	-0.02733413316309452	-0.07990152388811111	0.4374619722366333	-0.010394616052508354	-0.07738229632377625	0.1924944519996643	0.00855801347643137	-0.08715691417455673	-0.19704735279083252	-0.02357867732644081	0.17831845581531525	-0.13986317813396454	-0.0045634382404387	0.05000629648566246	-0.23827636241912842	-0.01708417758345604	0.05432423576712608	-0.22522404789924622	0.015194219537079334	0.0034892954863607883	-0.2509291172027588	0.021571138873696327	-0.015557111240923405	-0.006574489176273346	0.010566034354269505	-0.07329965382814407	-0.2234526425600052	0.027065638452768326	0.04715922102332115	Dasypus	novemcinctus	female	French Guiana	1.973748049674787	94.13433299287043
Dasypus nov 2007-379	0.6717697381973267	-0.032063525170087814	-0.07184469699859619	0.43872377276420593	-0.015130255371332169	-0.07870788127183914	0.15637411177158356	0.01965317875146866	-0.08609843999147415	-0.16247650980949402	-0.02555149979889393	0.18130026757717133	-0.1386738419532776	0.001463423017412424	0.03752870485186577	-0.23970384895801544	-0.011507919989526272	0.05166013166308403	-0.23279792070388794	0.01157331932336092	0.0040107956156134605	-0.24135948717594147	0.012692597694694996	-0.025100352242588997	-0.02936605177819729	0.013534333556890488	-0.0606829933822155	-0.22248998284339905	0.02533634752035141	0.04793446138501167	Dasypus	novemcinctus	unknown	USA	1.9231654654290802	83.78484400967362
Dasypus nov v3415	0.6635961532592773	-0.038592379540205	-0.08005419373512268	0.4405275881290436	-0.005364213138818741	-0.07577981054782867	0.17042511701583862	0.01682768203318119	-0.08293908834457397	-0.19778749346733093	-0.01595197431743145	0.17332153022289276	-0.1414898782968521	0.002134482841938734	0.030246729031205177	-0.2304043173789978	-0.018868455663323402	0.0553109236061573	-0.2178163230419159	0.009573756717145443	0.006712849717587233	-0.2527957260608673	0.010695896111428738	-0.007150294724851847	-0.012242658995091915	0.018698973581194878	-0.06803873926401138	-0.2220124453306198	0.020846230909228325	0.04837008938193321	Dasypus	novemcinctus	unknown	French Guiana	1.8858699950670623	76.89002375302262
Dasypus nov v3416	0.674540102481842	-0.031186925247311592	-0.08364284783601761	0.4344654679298401	-0.01102882344275713	-0.07301061600446701	0.1685376614332199	0.013665633276104927	-0.0794425830245018	-0.19894452393054962	-0.017879772931337357	0.16575880348682404	-0.1474650651216507	-3.9173781988210976E-4	0.026035187765955925	-0.23016667366027832	-0.014740440994501114	0.05544723942875862	-0.21919354796409607	0.011811125092208385	0.014554624445736408	-0.23364031314849854	0.016051430255174637	-0.011794524267315865	-0.023996373638510704	0.01195409707725048	-0.06584877520799637	-0.22413673996925354	0.021745415404438972	0.05194348469376564	Dasypus	novemcinctus	unknown	French Guiana	1.9388645500004003	86.86894556910522
Dasypus nov v3417	0.6750548481941223	-0.030706897377967834	-0.0735468938946724	0.4373774230480194	-0.01068444550037384	-0.0776987299323082	0.14675593376159668	0.01172285620123148	-0.0891319066286087	-0.2007104605436325	-0.023024706169962883	0.1758911907672882	-0.1444915533065796	0.006594580132514238	0.027667870745062828	-0.2268093079328537	-0.018627667799592018	0.05357876792550087	-0.22401206195354462	0.012005435302853584	0.014581325463950634	-0.24561816453933716	0.019682101905345917	-0.008314579725265503	-0.009713588282465935	0.010451134294271469	-0.07186050713062286	-0.20783305168151855	0.02258761040866375	0.048833467066287994	Dasypus	novemcinctus	unknown	French Guiana	1.9230910618963308	83.7704911807083
Dasypus nov v3418	0.6655929088592529	-0.03028746321797371	-0.08137750625610352	0.44112348556518555	-0.010474609211087227	-0.07045876979827881	0.16404080390930176	0.011824547313153744	-0.08671185374259949	-0.20936046540737152	-0.02148866467177868	0.17246036231517792	-0.13680386543273926	0.002070196671411395	0.02858392894268036	-0.22569194436073303	-0.01626446098089218	0.058532435446977615	-0.2212955355644226	0.010540634393692017	0.009522954933345318	-0.25095346570014954	0.01934635452926159	-0.00725904805585742	-0.013830622658133507	0.011268428526818752	-0.0749029591679573	-0.21282131969928741	0.02346503920853138	0.05161045119166374	Dasypus	novemcinctus	unknown	French Guiana	1.9330484551200136	85.7133472023106
Dasypus nov AM78	0.6736916303634644	-0.026097025722265244	-0.07359547168016434	0.44527679681777954	-0.017670847475528717	-0.06780599057674408	0.14450393617153168	0.012705649249255657	-0.09085346758365631	-0.17917168140411377	-0.02296176739037037	0.15204177796840668	-0.145230233669281	8.557824767194688E-4	0.03302733972668648	-0.23138317465782166	-0.012354317121207714	0.05423063039779663	-0.2267100065946579	0.012568864040076733	0.020134003832936287	-0.2468499392271042	0.016427434980869293	0.004575917962938547	-0.012881163507699966	0.009116195142269135	-0.08429264277219772	-0.22124618291854858	0.027410030364990234	0.05253790318965912	Dasypus	novemcinctus	female	Brazil	1.941333223335121	87.36414345978784
Dasypus nov AP207	0.6861539483070374	-0.029019057750701904	-0.07296581566333771	0.41152215003967285	-0.012648352421820164	-0.07422559708356857	0.16542114317417145	0.013325137086212635	-0.08270862698554993	-0.18028365075588226	-0.028039246797561646	0.1811591386795044	-0.12328500300645828	0.003095269203186035	0.02278864197432995	-0.2296765297651291	-0.01818336360156536	0.0580851249396801	-0.22269831597805023	0.01827722042798996	-0.005614137277007103	-0.2559548318386078	0.021311575546860695	-0.0012699852231889963	-0.029105186462402344	0.004289669916033745	-0.07639522850513458	-0.22209370136260986	0.027591148391366005	0.0511464923620224	Dasypus	novemcinctus	male	Brazil	1.9492776956214604	88.97698706949974
Dasypus nov 23952	0.6672341227531433	-0.03838871791958809	-0.076598159968853	0.4400416314601898	-0.0068401917815208435	-0.08001096546649933	0.17281152307987213	0.018884995952248573	-0.08400727063417435	-0.19516946375370026	-0.013818176463246346	0.1657850593328476	-0.14604316651821136	0.005083704832941294	0.03205195441842079	-0.23815949261188507	-0.019012004137039185	0.04956161603331566	-0.22079914808273315	0.004632236901670694	0.014383579604327679	-0.2388192117214203	0.010635461658239365	7.210816693259403E-5	-0.020561520010232925	0.017821310088038445	-0.06646409630775452	-0.2205353081226349	0.021001381799578667	0.04522617906332016	Dasypus	novemcinctus	unknown	Suriname	1.9572235614551259	90.61989642360092
Dasypus nov 18024	0.6767769455909729	-0.029636606574058533	-0.0724429339170456	0.41819339990615845	-0.009771731682121754	-0.0765778198838234	0.16423821449279785	0.008461013436317444	-0.08206641674041748	-0.17047537863254547	-0.02768339402973652	0.18131642043590546	-0.1520410031080246	0.0038741356693208218	0.02962925098836422	-0.2342444807291031	-0.01397614274173975	0.05457882210612297	-0.2260093241930008	0.010977482423186302	0.008118990808725357	-0.253324419260025	0.02349257655441761	-0.011569485999643803	1.953245373442769E-4	0.008906833827495575	-0.0835656002163887	-0.22330929338932037	0.025355834513902664	0.052578773349523544	Dasypus	novemcinctus	male	Suriname	1.9639085773480525	92.02558297467104
Dasypus nov 8538	0.6666485071182251	-0.031962066888809204	-0.07957456260919571	0.4464101195335388	-0.011457479558885098	-0.06482206284999847	0.16329419612884521	0.010921715758740902	-0.08100816607475281	-0.15405011177062988	-0.02088421769440174	0.17171931266784668	-0.15204304456710815	0.004147632047533989	0.03509858623147011	-0.2358291745185852	-0.022845838218927383	0.05425681918859482	-0.22439835965633392	0.013677735812962055	0.0014579977141693234	-0.2528909146785736	0.020855681970715523	-0.014784252271056175	-0.03521356359124184	0.01481102965772152	-0.07254331558942795	-0.22192765772342682	0.022735806182026863	0.05019965022802353	Dasypus	novemcinctus	unknown	Mexico	1.9156252339540147	82.34272476823168
Dasypus nov 29160	0.6546967625617981	-0.03349953889846802	-0.08284945040941238	0.46120917797088623	-0.008127688430249691	-0.07073792070150375	0.15974345803260803	0.012364877387881279	-0.078770212829113	-0.1764919012784958	-0.017676537856459618	0.1705474853515625	-0.14451207220554352	-0.0024118053261190653	0.03214392438530922	-0.23488153517246246	-0.01589665748178959	0.053212396800518036	-0.23568250238895416	0.008237827569246292	0.011937897652387619	-0.24276235699653625	0.021509600803256035	-0.021155398339033127	-0.018623294308781624	0.014325391501188278	-0.06506465375423431	-0.22269578278064728	0.021174531430006027	0.0507359504699707	Dasypus	novemcinctus	unknown	USA	1.8761390633301454	75.18636060770247
Dasypus nov 15762	0.6689075827598572	-0.03382394462823868	-0.08486704528331757	0.43978992104530334	-0.011493301019072533	-0.07332897931337357	0.169667586684227	0.018068963661789894	-0.07684841006994247	-0.17463771998882294	-0.017119884490966797	0.16287994384765625	-0.1586409956216812	0.0010973488679155707	0.030328020453453064	-0.24518519639968872	-0.017694341018795967	0.051344506442546844	-0.2284586876630783	0.012257812544703484	0.012059473432600498	-0.2351977825164795	0.006062177009880543	-0.0162301417440176	-0.014869648963212967	0.014440825209021568	-0.054844267666339874	-0.22137509286403656	0.02820434421300888	0.04950690641999245	Dasypus	novemcinctus	unknown	Costa Rica	1.9212679461859592	83.41956986809174
Dasypus nov 31174	0.6583269238471985	-0.031352221965789795	-0.08000820875167847	0.45247986912727356	-0.01563039794564247	-0.07543028891086578	0.16195876896381378	0.02036670222878456	-0.08506245911121368	-0.19351720809936523	-0.011564581654965878	0.1819889396429062	-0.1435070037841797	-0.009256857447326183	0.035612549632787704	-0.23248633742332458	-0.019059332087635994	0.05239097401499748	-0.22511227428913116	0.007377769332379103	0.007188038434833288	-0.23433786630630493	0.02525019645690918	-0.019981952384114265	-0.01961812563240528	0.01897384040057659	-0.06649042665958405	-0.2241867482662201	0.014894883148372173	0.049792829900979996	Dasypus	novemcinctus	unknown	USA	1.9074910952766055	80.81483587629856
Dasypus nov 7157	0.6694161295890808	-0.029428735375404358	-0.08764994889497757	0.4404051601886749	-0.014879581518471241	-0.05816573649644852	0.1621195375919342	0.011587562970817089	-0.08091527223587036	-0.18156445026397705	-0.021635213866829872	0.17252708971500397	-0.15748198330402374	0.0063111865893006325	0.02953329123556614	-0.22878625988960266	-0.021473372355103493	0.05841605365276337	-0.21522241830825806	0.015075319446623325	0.004814267158508301	-0.24803221225738525	0.012885925360023975	-0.01171460933983326	-0.02077418379485607	0.01614154502749443	-0.08106689155101776	-0.22007931768894196	0.025415366515517235	0.054221756756305695	Dasypus	novemcinctus	unknown	Belize	1.934672352113539	86.03444314880281
Dasypus nov 29187	0.6741144061088562	-0.03225511685013771	-0.08427926152944565	0.4378802180290222	-0.00991637259721756	-0.06921468675136566	0.15016400814056396	0.013387195765972137	-0.0799824595451355	-0.1817697137594223	-0.018786262720823288	0.17554046213626862	-0.14328721165657043	-0.0046263220719993114	0.03730354085564613	-0.23180516064167023	-0.019322846084833145	0.06426060199737549	-0.2319755256175995	0.007603468373417854	0.004500204231590033	-0.23468191921710968	0.03011258691549301	-0.033000506460666656	-0.017592977732419968	0.013826237060129642	-0.06433850526809692	-0.22104616463184357	0.01997743360698223	0.049210622906684875	Dasypus	novemcinctus	unknown	USA	1.9055219827350653	80.44924686118233
Dasypus nov 281290	0.6643926501274109	-0.029889576137065887	-0.07976649701595306	0.43899065256118774	-0.007487399969249964	-0.07685717940330505	0.16929732263088226	0.006722296122461557	-0.08136298507452011	-0.18042254447937012	-0.01763434335589409	0.16363781690597534	-0.14007090032100677	-0.004952336195856333	0.028974397107958794	-0.2431281954050064	-0.02284966967999935	0.06285249441862106	-0.22854186594486237	0.0130243431776762	0.00840066559612751	-0.24060006439685822	0.02994416654109955	-0.016286320984363556	-0.005631613545119762	0.01013527624309063	-0.06178281083703041	-0.23428547382354736	0.0229872427880764	0.052190423011779785	Dasypus	novemcinctus	male	Colombia	1.9036244416150765	80.09851078244274
Dasypus nov A22839	0.6520532369613647	-0.03117014840245247	-0.0851469486951828	0.45699721574783325	-0.011809817515313625	-0.06867218762636185	0.1672021895647049	0.012703463435173035	-0.08362188935279846	-0.19878898561000824	-0.016925109550356865	0.17588481307029724	-0.15196773409843445	-0.003443446010351181	0.03615010157227516	-0.22385923564434052	-0.021137088537216187	0.05037742853164673	-0.2286802977323532	0.009001558646559715	0.010179351083934307	-0.2503894567489624	0.01600112020969391	-0.014034859836101532	-0.010266955010592937	0.018735306337475777	-0.07129855453968048	-0.21229998767375946	0.028044162318110466	0.050182756036520004	Dasypus	novemcinctus	unknown	Honduras	1.8995509161369368	79.35072811161456
Dasypus nov 283467	0.6685197353363037	-0.028742237016558647	-0.07736355811357498	0.44310542941093445	-0.011508570984005928	-0.06781773269176483	0.1633896827697754	0.00782924797385931	-0.09142579138278961	-0.17708267271518707	-0.025286318734288216	0.16830964386463165	-0.14318305253982544	0.00261647067964077	0.037166427820920944	-0.22839628159999847	-0.019048992544412613	0.05684235319495201	-0.2234174609184265	0.016207117587327957	0.00449674017727375	-0.24978995323181152	0.02064044401049614	-0.013690349645912647	-0.030507992953062057	0.010297500528395176	-0.06920783221721649	-0.22263745963573456	0.026995336636900902	0.052690111100673676	Dasypus	novemcinctus	male	Brazil	1.9243604026912837	84.01569081240223
Dasypus nov 339668	0.6841634511947632	-0.03472178056836128	-0.07723797857761383	0.4183403551578522	-0.0069438801147043705	-0.07238586992025375	0.16789358854293823	0.017097478732466698	-0.08650196343660355	-0.19232232868671417	-0.019837861880660057	0.1764024794101715	-0.153411403298378	-0.006078463047742844	0.04136056452989578	-0.22716373205184937	-0.02035529725253582	0.05772162228822708	-0.21325379610061646	0.01490330696105957	0.009101377800107002	-0.23799414932727814	0.02303772047162056	-0.018051279708743095	-0.03213658183813095	0.009807657450437546	-0.07887554913759232	-0.2141154259443283	0.02309112250804901	0.04846660792827606	Dasypus	novemcinctus	female	Guyana	1.9727169516514789	93.9111052100816
Dasypus nov 171052	0.6588751077651978	-0.03584924712777138	-0.07176367193460464	0.4463091790676117	-0.006464160047471523	-0.07312081009149551	0.1649414449930191	0.012726963497698307	-0.09177757054567337	-0.17632775008678436	-0.014459257945418358	0.15999367833137512	-0.14053583145141602	-0.002946153050288558	0.02787269651889801	-0.238785520195961	-0.025835689157247543	0.0582321360707283	-0.23474426567554474	0.012330897152423859	0.021623006090521812	-0.2469354122877121	0.018330087885260582	2.963377337437123E-4	-0.0017887407448142767	0.01799194887280464	-0.08186151832342148	-0.23100821673870087	0.024174610152840614	0.05050572752952576	Dasypus	novemcinctus	male	Panama	1.8998303595295876	79.40180214774159
Dasypus nov 568206	0.663289487361908	-0.03525133430957794	-0.08130700141191483	0.442664235830307	-0.013781341724097729	-0.06857674568891525	0.1681392341852188	0.019924825057387352	-0.08492054045200348	-0.19200973212718964	-0.016677627339959145	0.18777067959308624	-0.13449226319789886	0.0033749956637620926	0.02152460813522339	-0.23472915589809418	-0.02462528645992279	0.06141045689582825	-0.23023366928100586	0.008178802207112312	0.008837605826556683	-0.2380167692899704	0.011438765563070774	-0.020750094205141068	-0.03169914335012436	0.025618623942136765	-0.07075811922550201	-0.21291221678256989	0.02179957553744316	0.0467691607773304	Dasypus	novemcinctus	unknown	USA	1.9550311840342174	90.16358762470631
Dasypus nov A06503	0.6633160710334778	-0.03127772733569145	-0.07564505934715271	0.44812795519828796	-0.013912534341216087	-0.06917569786310196	0.1722765564918518	0.010266544297337532	-0.08298362046480179	-0.16456519067287445	-0.02190648950636387	0.16747157275676727	-0.1455933004617691	0.002684817649424076	0.02933751419186592	-0.22483114898204803	-0.01680208183825016	0.05311731621623039	-0.23427808284759521	0.009966935031116009	0.008360165171325207	-0.25698885321617126	0.010839550755918026	-0.007665960118174553	-0.039442867040634155	0.021438350901007652	-0.07308804988861084	-0.21802110970020294	0.0287026334553957	0.05027182027697563	Dasypus	novemcinctus	unknown	Mexico	1.9279672964660843	84.71636180565213
Dasypus nov 33867	0.6683018803596497	-0.03320787474513054	-0.07758860290050507	0.44414111971855164	-0.017033463343977928	-0.06577227264642715	0.16381140053272247	0.019019249826669693	-0.08830244839191437	-0.1725245863199234	-0.017577216029167175	0.17486533522605896	-0.14295834302902222	0.008180288597941399	0.034101441502571106	-0.2282436639070511	-0.02289583720266819	0.053472064435482025	-0.23521742224693298	0.009100652299821377	0.010543466545641422	-0.24834321439266205	0.01301388256251812	-0.016377586871385574	-0.03916739299893379	0.022243157029151917	-0.07257891446352005	-0.20979979634284973	0.019157160073518753	0.04763752967119217	Dasypus	novemcinctus	female	USA	1.9470749072219422	88.52682879614038
Dasypus nov 244903	0.673940122127533	-0.033636000007390976	-0.07269715517759323	0.4379207491874695	-0.006838998291641474	-0.06721428036689758	0.16160894930362701	0.005591210909187794	-0.08229656517505646	-0.15633264183998108	-0.02207132615149021	0.14929629862308502	-0.14947187900543213	0.006739297416061163	0.03377262130379677	-0.23561689257621765	-0.019747188314795494	0.06373292952775955	-0.232791006565094	0.013246065005660057	0.021516799926757812	-0.2479974925518036	0.017130419611930847	-0.01347557082772255	-0.029103048145771027	0.015873046591877937	-0.09068513661623001	-0.22215691208839417	0.023713473230600357	0.05805004760622978	Dasypus	novemcinctus	male	Guatemala	1.9289579769809662	84.90983109694567
Dasypus nov 337563	0.6553890705108643	-0.03581837937235832	-0.08360163867473602	0.45058920979499817	-0.004438585601747036	-0.06702472269535065	0.16937190294265747	0.011569957248866558	-0.08608842641115189	-0.19505582749843597	-0.020161153748631477	0.184241384267807	-0.15297017991542816	-0.0031317616812884808	0.03840130940079689	-0.2312716245651245	-0.02080227993428707	0.054138921201229095	-0.226272851228714	0.014098244719207287	0.014932321384549141	-0.23779451847076416	0.014140604995191097	-0.02230670675635338	-0.018661143258213997	0.018757399171590805	-0.07964759320020676	-0.21332404017448425	0.025785954669117928	0.04695515334606171	Dasypus	novemcinctus	female	Nicaragua	1.924225164216853	83.98953255934086
Dasypus nov 32868	0.6667471528053284	-0.02936759777367115	-0.08163796365261078	0.4447997808456421	-0.011922594159841537	-0.0686434656381607	0.17786452174186707	0.012471895664930344	-0.07918056100606918	-0.18076357245445251	-0.01854432001709938	0.16406790912151337	-0.14908218383789062	-0.0033499160781502724	0.02616119012236595	-0.23275485634803772	-0.01627495512366295	0.055217716842889786	-0.2247922420501709	0.013465614058077335	0.011106174439191818	-0.24604637920856476	0.02212265506386757	-0.007166740950196981	-0.0433395691215992	0.009285533800721169	-0.06925471872091293	-0.2126326560974121	0.022113684564828873	0.0493304617702961	Dasypus	novemcinctus	male	Guyana	1.950086429587057	89.14283249513029
Dasypus nov 31693	0.6605677008628845	-0.0269027017056942	-0.07903026789426804	0.4556226134300232	-0.017871610820293427	-0.07132922857999802	0.16374056041240692	0.01320373173803091	-0.08868112415075302	-0.1833866685628891	-0.018689222633838654	0.1534969061613083	-0.14748956263065338	-3.1897641019895673E-4	0.036177221685647964	-0.2326427549123764	-0.01511236559599638	0.056500814855098724	-0.2278912514448166	0.012162483297288418	0.012651054188609123	-0.2411111444234848	0.01374849583953619	-0.015211665071547031	-0.022213073447346687	0.014428398571908474	-0.06481512635946274	-0.2251964509487152	0.025351768359541893	0.06024142727255821	Dasypus	novemcinctus	female	Guyana	1.9351586129031177	86.13082614988822
Dasypus nov 32275	0.6748583912849426	-0.032093197107315063	-0.07548592984676361	0.42570897936820984	-0.012247387319803238	-0.07470115274190903	0.16697953641414642	0.013517806306481361	-0.08581756800413132	-0.1886860430240631	-0.02308282069861889	0.18703080713748932	-0.13354448974132538	0.0031313812360167503	0.0283593088388443	-0.2295079231262207	-0.017831871286034584	0.05062013491988182	-0.22428995370864868	0.0176572073251009	0.008674796670675278	-0.2467789351940155	0.010514240711927414	-0.008452844806015491	-0.02246175706386566	0.017538711428642273	-0.07493175566196442	-0.22227783501148224	0.022895928472280502	0.04470419883728027	Dasypus	novemcinctus	male	Guyana	1.9609895230647096	91.40911896363917
Dasypus nov 32261	0.6862819194793701	-0.03448953852057457	-0.0738673061132431	0.42785727977752686	-0.016971530392766	-0.07860881090164185	0.1468593180179596	0.02037639543414116	-0.07832972705364227	-0.1702646166086197	-0.016174355521798134	0.17167188227176666	-0.13523291051387787	0.009385584853589535	0.03790317848324776	-0.2242538183927536	-0.016832387074828148	0.04652443900704384	-0.2301999032497406	0.002478558337315917	0.00784999318420887	-0.2443738430738449	0.015848103910684586	-0.022576183080673218	-0.030399208888411522	0.02048579230904579	-0.06469300389289856	-0.22627423703670502	0.015893375501036644	0.054125551134347916	Dasypus	novemcinctus	unknown	Guyana	1.900381594159501	79.50264803420565
Dasypus nov 31996	0.6735993027687073	-0.0300259068608284	-0.0819864496588707	0.432869553565979	-0.011571717448532581	-0.07744189351797104	0.1654573529958725	0.013508233241736889	-0.08146018534898758	-0.20523932576179504	-0.02025984227657318	0.1742803007364273	-0.13482694327831268	-0.0025749627966433764	0.04519138112664223	-0.23165424168109894	-0.013530447147786617	0.04785382002592087	-0.22060823440551758	0.012899452820420265	0.006500293966382742	-0.24289822578430176	0.016971370205283165	-0.010391966439783573	-0.021155191585421562	0.01154385320842266	-0.06404884159564972	-0.21554404497146606	0.023039964959025383	0.04150354489684105	Dasypus	novemcinctus	female	Guyana	1.9608291526385282	91.37537086480124
Dasypus nov 1-2-1-34	0.6788586974143982	-0.03315543010830879	-0.07444196939468384	0.4398389458656311	-0.012095359154045582	-0.0644538551568985	0.15438543260097504	0.014091521501541138	-0.07750028371810913	-0.1366199553012848	-0.02250124327838421	0.15543077886104584	-0.13373076915740967	-5.624985205940902E-4	0.029874546453356743	-0.23589634895324707	-0.020893866196274757	0.062043990939855576	-0.22453747689723969	0.013447233475744724	0.004313331097364426	-0.26320698857307434	0.019374903291463852	-0.022637203335762024	-0.05743743106722832	0.012087446637451649	-0.07081771641969681	-0.22165410220623016	0.03020729310810566	0.05818839371204376	Dasypus	novemcinctus	male	Bolivia	1.9188504201277745	82.95649992094533
Dasypus nov 82-9-30-31	0.6796146631240845	-0.04409326985478401	-0.07518830895423889	0.4460151195526123	-0.005045754835009575	-0.07110900431871414	0.1411081999540329	0.024352839216589928	-0.07977182418107986	-0.17165479063987732	-0.019456202164292336	0.16771286725997925	-0.1313595175743103	0.005369079764932394	0.030956270173192024	-0.22118671238422394	-0.010524438694119453	0.047753844410181046	-0.23236247897148132	0.005537356715649366	0.014219312928617	-0.2505911886692047	0.0045286207459867	-0.012625436298549175	-0.04670622944831848	0.016797654330730438	-0.06749026477336884	-0.2128770500421524	0.022534113377332687	0.045542556792497635	Dasypus	novemcinctus	unknown	Brazil	1.922888339473201	83.73139744415487
Dasypus nov 3-9-4-102	0.6671354174613953	-0.03563662990927696	-0.07468006759881973	0.4532022774219513	-0.0070705413818359375	-0.07507443428039551	0.156578928232193	0.016213873401284218	-0.08038704842329025	-0.17279064655303955	-0.018023766577243805	0.14646859467029572	-0.13722676038742065	-0.0010277425171807408	0.03767428919672966	-0.2319612354040146	-0.018353134393692017	0.055655885487794876	-0.22694019973278046	0.015349462628364563	0.016514921560883522	-0.24276655912399292	0.014725426211953163	-0.0052117533050477505	-0.029530296102166176	0.007455398328602314	-0.07391930371522903	-0.23570093512535095	0.026367655023932457	0.05295892059803009	Dasypus	novemcinctus	male	Brazil	1.8872531464251743	77.13529528883487
Dasypus nov 1-6-6-84	0.6697259545326233	-0.027704952284693718	-0.07889647781848907	0.4490870237350464	-0.016580289229750633	-0.06626661866903305	0.1508682370185852	0.013566626235842705	-0.08135998249053955	-0.17108766734600067	-0.022687027230858803	0.1665777713060379	-0.14410217106342316	-9.952714899554849E-4	0.03563060238957405	-0.23256592452526093	-0.018566330894827843	0.06193319335579872	-0.22459931671619415	0.01567469909787178	0.007328844163566828	-0.24766090512275696	0.02086777798831463	-0.02109832502901554	-0.03320552408695221	0.01163086574524641	-0.07816321402788162	-0.2164597064256668	0.024793902412056923	0.054314207285642624	Dasypus	novemcinctus	female	Brazil	1.8907355449153451	77.7562925198804
Dasypus nov 5-7-5-22	0.671932578086853	-0.033286936581134796	-0.0827014297246933	0.45438119769096375	-0.0073129478842020035	-0.07164324074983597	0.15653985738754272	0.011463497765362263	-0.07461042702198029	-0.171757310628891	-0.007815781980752945	0.14532147347927094	-0.15009906888008118	-0.008000284433364868	0.035911865532398224	-0.23487085103988647	-0.024298574775457382	0.047479838132858276	-0.22321417927742004	0.01251342985779047	0.016228633001446724	-0.23578238487243652	0.029506422579288483	-0.006038266234099865	-0.03987351059913635	0.009663322009146214	-0.05837573483586311	-0.22725634276866913	0.01756785437464714	0.04842729493975639	Dasypus	novemcinctus	female	Venezuela	1.9551122055405832	90.18041001471964
Dasypus nov 28-10-11-54	0.6849101185798645	-0.0370209664106369	-0.07673786580562592	0.43288376927375793	-0.008049402385950089	-0.0646355003118515	0.15827903151512146	0.01697751320898533	-0.0893188938498497	-0.1665544956922531	-0.018708081915974617	0.14325426518917084	-0.1485590636730194	0.003277193522080779	0.03389729931950569	-0.23435504734516144	-0.014729357324540615	0.06075425446033478	-0.22009330987930298	0.013280645944178104	0.0173704382032156	-0.24380189180374146	0.00978232640773058	-0.00541310478001833	-0.03955957666039467	0.01279882900416851	-0.07010159641504288	-0.22314952313899994	0.02239130064845085	0.050930704921483994	Dasypus	novemcinctus	male	Brazil	1.9465830928003867	88.4266338141849
Dasypus nov 11-10-27-3	0.6846674084663391	-0.027622034773230553	-0.07623453438282013	0.43618717789649963	-0.012446899898350239	-0.07002437859773636	0.1498240828514099	0.007510009687393904	-0.08497581630945206	-0.17415545880794525	-0.02381683513522148	0.1624990999698639	-0.14162640273571014	0.002922759158536792	0.03023691475391388	-0.2298448383808136	-0.017258988693356514	0.05852263793349266	-0.2191978096961975	0.01571965031325817	0.007054407615214586	-0.24293829500675201	0.02716144174337387	-0.014881975017488003	-0.0460633747279644	0.006887443829327822	-0.06418482214212418	-0.21685247123241425	0.020943455398082733	0.051988475024700165	Dasypus	novemcinctus	unknown	Paraguay	1.9384939372186327	86.79484605865382
Dasypus nov 84-357	0.6569820046424866	-0.035177018493413925	-0.08215052634477615	0.4505230188369751	-0.010577645152807236	-0.06832777708768845	0.17115561664104462	0.019200313836336136	-0.08670532703399658	-0.18971064686775208	-0.016774797812104225	0.1784801334142685	-0.14446040987968445	-0.004421816673129797	0.04036761447787285	-0.23661237955093384	-0.015164371579885483	0.05237109586596489	-0.22359681129455566	0.010090647265315056	0.010417355224490166	-0.2443452924489975	0.01190083846449852	-0.014795854687690735	-0.024025317281484604	0.020157992839813232	-0.07445592433214188	-0.21590980887413025	0.02076585777103901	0.04479920491576195	Dasypus	novemcinctus	male	British Honduras	1.928043695131007	84.73126594678291
Dasypus nov 26-1-12-22	0.6807093024253845	-0.029687410220503807	-0.08052616566419601	0.4388557970523834	-0.010770418681204319	-0.0744132325053215	0.15096770226955414	0.009565148502588272	-0.0786413922905922	-0.19526110589504242	-0.020700503140687943	0.15371358394622803	-0.1358775794506073	8.42979468870908E-4	0.038946181535720825	-0.23244036734104156	-0.012622090987861156	0.05850290507078171	-0.2216096967458725	0.014206278137862682	0.015617531724274158	-0.2334386259317398	0.017621664330363274	-0.01639958843588829	-0.03140006959438324	0.010146214626729488	-0.06856624037027359	-0.22050537168979645	0.021398136392235756	0.051766421645879745	Dasypus	novemcinctus	female	Bolivia	1.9390632556146623	86.90870038377655
Dasypus nov 65-5-18-2	0.6480283737182617	-0.02554483152925968	-0.07648813724517822	0.46168723702430725	-0.017166731879115105	-0.0713091790676117	0.1705375760793686	0.011996817775070667	-0.08991915732622147	-0.18437917530536652	-0.025129204615950584	0.17865830659866333	-0.13500170409679413	0.0017627693014219403	0.03818899393081665	-0.23298846185207367	-0.01681939698755741	0.05670524016022682	-0.22650723159313202	0.011011948809027672	0.006664141546934843	-0.25025367736816406	0.02382105402648449	-0.015654556453227997	-0.029433254152536392	0.011319604702293873	-0.07534988224506378	-0.22168968617916107	0.024747971445322037	0.04850423336029053	Dasypus	novemcinctus	unknown	Guatemala	1.9202488796500325	83.22405637196927
Dasypus nov 28-10-11-53	0.6758219599723816	-0.033005718141794205	-0.07556026428937912	0.4359784424304962	-0.010320129804313183	-0.0692848190665245	0.1611657589673996	0.014532272703945637	-0.08594266325235367	-0.17997410893440247	-0.019020739942789078	0.1603316217660904	-0.12470606714487076	0.001708103925921023	0.023528078570961952	-0.23399600386619568	-0.02011474221944809	0.061526354402303696	-0.2248280644416809	0.01473794411867857	0.01574627310037613	-0.24796143174171448	0.02006271481513977	-0.006507048383355141	-0.03449898958206177	0.01076153852045536	-0.07480771839618683	-0.22700148820877075	0.02065875567495823	0.050970178097486496	Dasypus	novemcinctus	male	Brazil	1.9374950259082988	86.59544052941742
Dasypus nov 3-9-4-101	0.673305332660675	-0.03861653804779053	-0.07028839737176895	0.4495638906955719	-0.004756447393447161	-0.07131677120923996	0.1448308825492859	0.015497738495469093	-0.09051869064569473	-0.1670803725719452	-0.02009768784046173	0.1478467732667923	-0.1429387778043747	4.17962291976437E-6	0.03859805315732956	-0.22722043097019196	-0.013167173601686954	0.06370522826910019	-0.22582635283470154	0.013180887326598167	0.016278011724352837	-0.2495245486497879	0.014963550493121147	-0.011568065732717514	-0.028134597465395927	0.012918813154101372	-0.07635824382305145	-0.22697503864765167	0.020072678104043007	0.053622111678123474	Dasypus	novemcinctus	male	Brazil	1.8896288995588406	77.55841042722865
Dasypus nov 82-7-26-12	0.6657159328460693	-0.03549320250749588	-0.07580499351024628	0.4545314908027649	-0.005247506778687239	-0.06876686960458755	0.13866779208183289	0.009536129422485828	-0.08509111404418945	-0.17498274147510529	-0.02394542284309864	0.17676787078380585	-0.14381591975688934	0.0043932427652180195	0.04012320190668106	-0.23177410662174225	-0.019989866763353348	0.05671515688300133	-0.22736027836799622	0.010805453173816204	0.008918562904000282	-0.24013592302799225	0.020568635314702988	-0.017885131761431694	-0.02045728825032711	0.015318287536501884	-0.08494884520769119	-0.2203889787197113	0.02405424974858761	0.049972157925367355	Dasypus	novemcinctus	female	Mexico	1.892279213426898	78.03316343860506
Dasypus nov 82-9-30-32	0.676690399646759	-0.029803726822137833	-0.06958051770925522	0.4406028985977173	-0.013043832033872604	-0.07280020415782928	0.16480380296707153	0.00883684866130352	-0.08447982370853424	-0.14609256386756897	-0.019614754244685173	0.13649822771549225	-0.13973724842071533	0.003530856454744935	0.03565860912203789	-0.23695707321166992	-0.022350827232003212	0.06363142281770706	-0.22645336389541626	0.01815260946750641	0.012823806144297123	-0.25546395778656006	0.020682116970419884	-0.012394356541335583	-0.048920679837465286	0.010595310479402542	-0.06640461832284927	-0.22847220301628113	0.023015398532152176	0.057047463953495026	Dasypus	novemcinctus	unknown	Brazil	1.9294657408053952	85.00916313099083
Dasypus nov 93-1-1-17	0.6877313852310181	-0.035597432404756546	-0.08044080436229706	0.4205077588558197	-0.0051862699910998344	-0.06857891380786896	0.16183772683143616	0.014696151949465275	-0.07648953050374985	-0.18396665155887604	-0.0244426466524601	0.1756981909275055	-0.1429816633462906	0.0021204319782555103	0.03306014835834503	-0.22824524343013763	-0.01791832596063614	0.0576585978269577	-0.2189643532037735	0.01604466699063778	0.008665007539093494	-0.23904621601104736	0.018480421975255013	-0.0168876014649868	-0.043387796729803085	0.006862233392894268	-0.08025575429201126	-0.21348492801189423	0.024940766394138336	0.047570668160915375	Dasypus	novemcinctus	unknown	Brazil	1.933938526174643	85.8891937851432
Dasypus nov 98-3-2-153	0.6664423942565918	-0.035945553332567215	-0.07706291973590851	0.4571722447872162	-0.01005147397518158	-0.0722171887755394	0.14666283130645752	0.018101690337061882	-0.07792716473340988	-0.1654682606458664	-0.016193963587284088	0.15370847284793854	-0.14392592012882233	0.004642404615879059	0.029318299144506454	-0.23656077682971954	-0.022665895521640778	0.06455677002668381	-0.22985978424549103	0.00677648326382041	0.015102693811058998	-0.24597683548927307	0.02095845527946949	-0.01683111861348152	-0.024517545476555824	0.013090314343571663	-0.06842681020498276	-0.22396832704544067	0.02128753811120987	0.04977896809577942	Dasypus	novemcinctus	male	Mexico	1.9158302362680433	82.38160261387583
Dasypus nov 14-4-25-86	0.6798911690711975	-0.026580842211842537	-0.07954749464988708	0.42737069725990295	-0.013077730312943459	-0.06967135518789291	0.17040830850601196	0.004693167749792337	-0.08250012993812561	-0.1776137351989746	-0.021881014108657837	0.15639705955982208	-0.13266506791114807	0.0039147986099123955	0.02665737457573414	-0.2344800978899002	-0.019596751779317856	0.053131040185689926	-0.22353562712669373	0.015339712612330914	0.015866674482822418	-0.24759402871131897	0.019936230033636093	-0.0058281999081373215	-0.03155234083533287	0.009951100684702396	-0.06656596064567566	-0.23022925853729248	0.027301330119371414	0.05206100642681122	Dasypus	novemcinctus	male	Ecuador	1.9329195420370915	85.68790839864775
Dasypus nov 98-10-3-23	0.6643357276916504	-0.03527357801795006	-0.07975799590349197	0.4237837493419647	-0.008482955396175385	-0.07451353222131729	0.17576968669891357	0.01862020418047905	-0.08803842216730118	-0.1964736431837082	-0.016902510076761246	0.2020462304353714	-0.13881103694438934	-0.0075325872749090195	0.03417884558439255	-0.22988863289356232	-0.02815789170563221	0.051853299140930176	-0.228854238986969	0.012449165806174278	0.001534881186671555	-0.24691294133663177	0.02286132238805294	-0.026361219584941864	-0.00592935411259532	0.01760873943567276	-0.0709541067481041	-0.21701931953430176	0.02481008879840374	0.05001202970743179	Dasypus	novemcinctus	female	Colombia	1.9099421979211115	81.27223403315418
Dasypus nov 24-12-12-73	0.6667682528495789	-0.029477303847670555	-0.07862598448991776	0.4435203969478607	-0.015961801633238792	-0.06942703574895859	0.1773163378238678	0.013724871911108494	-0.08760980516672134	-0.17822109162807465	-0.01456012949347496	0.15581683814525604	-0.14714954793453217	0.001806684653274715	0.02695290744304657	-0.2330295294523239	-0.02107912302017212	0.058327432721853256	-0.2253625988960266	0.013703820295631886	0.01648150384426117	-0.24017564952373505	0.01779932714998722	-0.008813008666038513	-0.035475920885801315	0.016316602006554604	-0.06643053889274597	-0.22819066047668457	0.01772705279290676	0.05332769826054573	Dasypus	novemcinctus	female	Peru	1.938290889697822	86.75427598489473
Dasypus nov 521183	0.6823922991752625	-0.03344756364822388	-0.07631687819957733	0.42808300256729126	-0.006443594582378864	-0.07581304758787155	0.17016611993312836	0.01046655885875225	-0.08715137839317322	-0.19482147693634033	-0.01698797196149826	0.14891012012958527	-0.1410820484161377	0.0010437802411615849	0.0324639156460762	-0.22988711297512054	-0.017032502219080925	0.05476268380880356	-0.22103726863861084	0.011769479140639305	0.017120493575930595	-0.24312274158000946	0.0181302260607481	2.7149799279868603E-4	-0.0331084318459034	0.010296963155269623	-0.06330317258834839	-0.2175823450088501	0.022204622626304626	0.049055758863687515	Dasypus	novemcinctus	female	Suriname	1.960348999948211	91.27440277181525
Dasypus nov 26-1-12-21	0.6725685596466064	-0.03087611123919487	-0.07963944226503372	0.4443582594394684	-0.008844862692058086	-0.07477264851331711	0.14911209046840668	0.009692828170955181	-0.08700273185968399	-0.21245667338371277	-0.02122982032597065	0.17264606058597565	-0.1376749575138092	0.00221669371239841	0.03500722348690033	-0.21844705939292908	-0.021323183551430702	0.05606301128864288	-0.21467703580856323	0.015136199072003365	0.009222881868481636	-0.24149854481220245	0.02133984863758087	-0.020577380433678627	-0.026741549372673035	0.010324236005544662	-0.0661824569106102	-0.21454313397407532	0.02356417290866375	0.05523548275232315	Dasypus	novemcinctus	female	Bolivia	1.9163015175721747	82.47104879401206
Dasypus nov 5-7-5-21	0.6991384029388428	-0.029825277626514435	-0.07730916887521744	0.40194714069366455	-0.00905566941946745	-0.07404913008213043	0.1580105721950531	0.008021773770451546	-0.08315112441778183	-0.18550561368465424	-0.01794460602104664	0.1595892310142517	-0.15351462364196777	-0.009663933888077736	0.04176289960741997	-0.22827720642089844	-0.01768600568175316	0.05167362093925476	-0.21974427998065948	0.018516510725021362	0.017019540071487427	-0.2359720766544342	0.023085448890924454	-0.011336183175444603	-0.01235870085656643	0.010856437496840954	-0.07583505660295486	-0.2237236648797989	0.0236953217536211	0.051635365933179855	Dasypus	novemcinctus	male	Venezuela	1.9586545169109668	90.91897206250016
Dasypus nov 98-10-3-22	0.6623311638832092	-0.026896826922893524	-0.07717818021774292	0.43468013405799866	-0.01101802196353674	-0.07133935391902924	0.1717756688594818	0.00783106405287981	-0.08643742650747299	-0.18475215137004852	-0.02334297075867653	0.16926591098308563	-0.1470184177160263	-0.004941956140100956	0.03515075519680977	-0.23273751139640808	-0.014773782342672348	0.059658247977495193	-0.23165598511695862	0.016668984666466713	0.01814841292798519	-0.248847097158432	0.02621772699058056	-0.007864235900342464	0.003939623013138771	0.0079878531396389	-0.08730734139680862	-0.22771544754505157	0.022267930209636688	0.04790321737527847	Dasypus	novemcinctus	unknown	Colombia	1.8901690332565857	77.65493012556595
Dasypus hyb 205706	0.6700714826583862	-0.028247661888599396	-0.06918899714946747	0.4456183612346649	-0.013560072518885136	-0.06424219906330109	0.15132422745227814	0.008818341419100761	-0.09151490032672882	-0.1435803323984146	-0.029976556077599525	0.1755034476518631	-0.13653260469436646	-0.0037218169309198856	0.02565671317279339	-0.2312595248222351	-0.017202135175466537	0.06031005457043648	-0.23704040050506592	0.017279881983995438	0.014300833456218243	-0.2532651424407959	0.024693086743354797	-0.018725864589214325	-0.04394831508398056	0.01100547332316637	-0.07852833718061447	-0.22138777375221252	0.030911460518836975	0.046429261565208435	Dasypus	hybridus	female	uruguay	1.7613908704725494	57.72857940993858
Dasypus hyb 205721	0.6740279197692871	-0.033083200454711914	-0.07170750945806503	0.44392308592796326	-0.007942162454128265	-0.06952366977930069	0.15264466404914856	0.011554607190191746	-0.08603642135858536	-0.18047460913658142	-0.02390568144619465	0.17527265846729279	-0.12606379389762878	-9.144707000814378E-4	0.03100656531751156	-0.2161080688238144	-0.022713182494044304	0.05452936142683029	-0.22571048140525818	0.012651937082409859	0.007713295519351959	-0.25481945276260376	0.026389015838503838	-0.018533341586589813	-0.05652672052383423	0.009048309177160263	-0.08120084553956985	-0.21089254319667816	0.02891482785344124	0.0584799200296402	Dasypus	hybridus	male	uruguay	1.7600367603925855	57.548864689752676
Dasypus hyb 205693	0.6705005764961243	-0.028998607769608498	-0.07038667798042297	0.4450845718383789	-0.018281083554029465	-0.0636182650923729	0.1496477872133255	0.016042912378907204	-0.08809315413236618	-0.1495400369167328	-0.026344921439886093	0.16725681722164154	-0.12222860753536224	-3.7663907278329134E-4	0.017910219728946686	-0.2246953248977661	-0.01449673157185316	0.05185942351818085	-0.24410216510295868	0.005935938563197851	0.014461509883403778	-0.26222896575927734	0.018307246267795563	-0.006343404296785593	-0.037046413868665695	0.011602875776588917	-0.07926023006439209	-0.2253914177417755	0.03660900890827179	0.05621375888586044	Dasypus	hybridus	female	uruguay	1.7353970761021797	54.37472532263448
Dasypus hyb 096511	0.6829226016998291	-0.03809870034456253	-0.08085280656814575	0.4122284948825836	-0.003359076799824834	-0.06531918793916702	0.16052769124507904	0.009888095781207085	-0.07585852593183517	-0.16651448607444763	-0.020765656605362892	0.1840326488018036	-0.11337463557720184	-0.0015230764402076602	0.015587910078465939	-0.23696546256542206	-0.019401490688323975	0.053590938448905945	-0.24155113101005554	0.011430814862251282	0.010576914995908737	-0.2590148150920868	0.01594706065952778	-0.02147137187421322	-0.01695639081299305	0.019448906183242798	-0.0746864378452301	-0.22130189836025238	0.026433119550347328	0.05439992621541023	Dasypus	hybridus	unknown	Agentina	1.7642420179485137	58.108814851370006
Dasypus sept 86-10-4-16	0.6901826858520508	-0.030379844829440117	-0.07724964618682861	0.4335750341415405	-0.0195551086217165	-0.06407490372657776	0.14060473442077637	0.02085685543715954	-0.06753510981798172	-0.14526814222335815	-0.019631149247288704	0.16283680498600006	-0.12519307434558868	0.001958328066393733	0.033759910613298416	-0.22950616478919983	-0.02641410380601883	0.0560288280248642	-0.23384445905685425	0.009537491016089916	0.0054261046461761	-0.250562846660614	0.026821231469511986	-0.016247600317001343	-0.06506094336509705	0.009161502122879028	-0.07891982793807983	-0.2149268388748169	0.027644801884889603	0.045975442975759506	Dasypus	septemcinctus	unknown	Brazil	1.775858223580095	59.684041486854554
Dasypus sept 3-7-7-152	0.6631021499633789	-0.029219796881079674	-0.0803317129611969	0.4456081986427307	-0.013473938219249249	-0.06538408249616623	0.1549237072467804	0.015432992950081825	-0.07577727735042572	-0.15707248449325562	-0.022429201751947403	0.1860426515340805	-0.12030106037855148	-0.009591827169060707	0.02285349927842617	-0.2376779466867447	-0.016483226791024208	0.05224798992276192	-0.2323213815689087	0.01480035949498415	0.005586134735494852	-0.2543891668319702	0.030729275196790695	-0.012702502310276031	-0.023897407576441765	0.0064477212727069855	-0.07641386985778809	-0.237974613904953	0.023787641897797585	0.04387917369604111	Dasypus	septemcinctus	female	Brazil	1.7228880354803582	52.83090320095165
Dasypus pil 19240	0.7004249095916748	-0.039835136383771896	-0.10466782748699188	0.41557472944259644	-0.010069308802485466	-0.05811583623290062	0.15888473391532898	0.021810434758663177	-0.05414200946688652	-0.18765847384929657	-0.0067959134466946125	0.15180425345897675	-0.14293833076953888	0.002792003797367215	0.032405950129032135	-0.2193177342414856	-0.017991047352552414	0.04790094122290611	-0.22620557248592377	0.004695433657616377	0.006789142265915871	-0.24005058407783508	0.006334119476377964	-0.017601462081074715	-0.04507073387503624	0.0199679397046566	-0.04610252007842064	-0.2136429399251938	0.019091477617621422	0.04172937572002411	Dasypus	pilosus	unknown	Peru	1.9284223841239096	84.8051807498339
Dasypus pil 94-10-1-13	0.7110182046890259	-0.042097050696611404	-0.09870962053537369	0.39234885573387146	-0.006948521826416254	-0.059601906687021255	0.1715225726366043	0.019208554178476334	-0.06375475227832794	-0.16380520164966583	-0.006111455615609884	0.14457492530345917	-0.14977328479290009	0.00692764762789011	0.042138878256082535	-0.23207344114780426	-0.024185391142964363	0.05123401805758476	-0.2261207103729248	0.007467031944543123	0.008226729929447174	-0.22628767788410187	0.008610490709543228	-0.030429061502218246	-0.049296729266643524	0.02157682552933693	-0.04190368950366974	-0.22753259539604187	0.015551871620118618	0.04822448268532753	Dasypus	pilosus	Female	Peru	1.8526847790519612	71.23358126886245
