# Supplementary material for: Beyond the carapace: skull shape variation and morphological systematics of long-nosed armadillos (genus Dasypus)
Source: PeerJ. 2017 Aug 15;5:e3650. doi: 10.7717/peerj.3650 (PMC5562145; doi:10.7717/peerj.3650)
Supplement: Supplemental Information 14 — Procrustres coordinates of crania used in the interspecific comparisons, including juveniles. [file peerj-05-3650-s014.xlsx]

## Sheet: Feuil1
.	1	1	1	2	2	2	3	3	3	4	4	4	5	5	5	6	6	6	7	7	7	8	8	8	9	9	9	10	10	10	11	11	11	12	12	12	13	13	13	14	14	14	15	15	15	16	16	16	17
Dasypus kap 98812	0.26933979988098145	0.004625247325748205	-0.023402081802487373	0.12366651743650436	0.0031649176962673664	0.006812846288084984	-0.04515501856803894	0.002024963963776827	0.07113203406333923	-0.12545451521873474	-3.3753743628039956E-4	0.07832258939743042	-0.15206710994243622	-0.0015631294809281826	0.04268861189484596	0.1209506094455719	-0.008072460070252419	0.006521796807646751	0.12241372466087341	0.015095667913556099	0.0056165531277656555	-0.012084931135177612	-0.04231666401028633	0.03831982985138893	-0.011150209233164787	0.04658845067024231	0.03379880636930466	-0.14661145210266113	-0.024720294401049614	0.06414095312356949	-0.14768046140670776	0.0207058172672987	0.06448167562484741	0.25068652629852295	-0.012949854135513306	-0.02597931958734989	0.23455217480659485	-0.011309294030070305	-0.023043617606163025	0.06232234463095665	-0.047676410526037216	0.015731995925307274	0.016585158184170723	-0.06356706470251083	0.02043118327856064	-0.014024488627910614	-0.03946066275238991	0.004123067017644644	-0.03191053122282028
Dasypus kap 76933	0.274890661239624	0.0071131265722215176	-0.02149323560297489	0.13240483403205872	0.004478981718420982	0.0063860127702355385	-0.04965068772435188	0.001628711586818099	0.07098982483148575	-0.11962458491325378	-0.001153046265244484	0.07162690907716751	-0.1460380107164383	-0.0016291812062263489	0.04211415350437164	0.13575926423072815	-0.009406252764165401	0.0024723936803638935	0.13175427913665771	0.017476623877882957	0.0023629816714674234	-0.015559990890324116	-0.04275467246770859	0.03890529274940491	-0.016923485323786736	0.04432011768221855	0.0375542938709259	-0.14779552817344666	-0.024406258016824722	0.05651415139436722	-0.1472051739692688	0.0240019503980875	0.05697084218263626	0.2531934380531311	-0.01427250262349844	-0.02769116498529911	0.23930484056472778	-0.013161428272724152	-0.02374262921512127	0.051531873643398285	-0.04764478653669357	0.01697528176009655	0.010225740261375904	-0.06701962649822235	0.019289502874016762	-0.01908060535788536	-0.03934767469763756	0.00707984808832407	-0.0359981544315815
Dasypus kap 136251	0.27488070726394653	0.005613747052848339	-0.025395242497324944	0.1263427436351776	0.004398662596940994	0.008566876873373985	-0.05044441297650337	7.550754235126078E-4	0.07125137001276016	-0.1295318454504013	-8.759056217968464E-4	0.0743820071220398	-0.14608994126319885	-0.0017616875702515244	0.04124465584754944	0.13127221167087555	-0.006523968651890755	0.004717781208455563	0.12752395868301392	0.016734594479203224	0.0034314501099288464	-0.014313163235783577	-0.04255034029483795	0.04067787528038025	-0.015531284734606743	0.044101566076278687	0.04072413966059685	-0.14987975358963013	-0.025357065722346306	0.06005486100912094	-0.1491757333278656	0.023985233157873154	0.05993367359042168	0.25628361105918884	-0.010883099399507046	-0.027973031625151634	0.23834764957427979	-0.01049329899251461	-0.025302238762378693	0.056016333401203156	-0.04343297332525253	0.014917830936610699	0.013393508270382881	-0.06277702748775482	0.02166997641324997	-0.016972893849015236	-0.037580423057079315	-3.055993583984673E-4	-0.03406735137104988
Dasypus kap 107299	0.27185872197151184	0.005493684206157923	-0.02181665040552616	0.1330205798149109	0.005504082888364792	0.007441203109920025	-0.04846327751874924	6.222105002962053E-4	0.069206103682518	-0.12668807804584503	-0.0018711406737565994	0.07335277646780014	-0.15246106684207916	-0.0016683604335412383	0.03821028396487236	0.13291437923908234	-0.010872750543057919	0.003221440827473998	0.1303849071264267	0.02069948986172676	0.00310701341368258	-0.014173600822687149	-0.04178444296121597	0.03861604630947113	-0.01596616394817829	0.044771574437618256	0.03870419040322304	-0.15121422708034515	-0.02616131491959095	0.05880798026919365	-0.15173277258872986	0.024430733174085617	0.057590242475271225	0.2518991231918335	-0.016792867332696915	-0.023667816072702408	0.23319271206855774	-0.014232782647013664	-0.021487025544047356	0.07051407545804977	-0.04135790467262268	0.015797041356563568	0.01877017877995968	-0.06497053056955338	0.019174376502633095	-0.01637825183570385	-0.04007779806852341	0.007693862076848745	-0.031186219304800034
Dasypus kap 108922	0.2731153666973114	0.004372239112854004	-0.02343582548201084	0.12439756095409393	0.003302803263068199	0.00822070799767971	-0.0533270426094532	-0.0014149369671940804	0.07061561942100525	-0.13106639683246613	-0.0023501156829297543	0.07441585510969162	-0.1477668732404709	-0.0011924790451303124	0.03907034546136856	0.12447594851255417	-0.01014932245016098	0.0057989745400846004	0.12402193993330002	0.019162064418196678	0.004251230042427778	-0.014636131003499031	-0.04405153915286064	0.04107197746634483	-0.018094848841428757	0.046214327216148376	0.03890668973326683	-0.1490776538848877	-0.02433204837143421	0.05797119066119194	-0.14958536624908447	0.02161647379398346	0.05930023640394211	0.256845086812973	-0.013962320052087307	-0.026598021388053894	0.2229548841714859	-0.010262295603752136	-0.023853780701756477	0.06502342969179153	-0.044773947447538376	0.014672801829874516	0.01631680317223072	-0.06347348541021347	0.021901162341237068	-0.01778382621705532	-0.03936303034424782	0.004677474033087492	-0.03660576045513153
Dasypus kwata	0.27259743213653564	0.006448845844715834	-0.025085095316171646	0.14288264513015747	0.0042166318744421005	0.0031499036122113466	-0.055195827037096024	-7.412330596707761E-4	0.0774514302611351	-0.13207365572452545	-0.002240361412987113	0.07295632362365723	-0.14778171479701996	-0.0010763430036604404	0.032177913933992386	0.12966589629650116	-0.010150455869734287	0.003471850650385022	0.1358758509159088	0.017228420823812485	0.002466582227498293	-0.021185101941227913	-0.04241932928562164	0.043083302676677704	-0.02372673712670803	0.0447612963616848	0.043342359364032745	-0.15270189940929413	-0.02374025247991085	0.05311515927314758	-0.1521138846874237	0.021075285971164703	0.05498979240655899	0.25151053071022034	-0.013352323323488235	-0.027649182826280594	0.23364655673503876	-0.013188846409320831	-0.025511080399155617	0.06492170691490173	-0.044071171432733536	0.01386122778058052	0.016364987939596176	-0.06392328441143036	0.021581022068858147	-0.020777154713869095	-0.03968857228755951	0.01102700736373663	-0.03556692972779274
Dasypus kap 388210	0.266877681016922	0.006514818873256445	-0.022732937708497047	0.1261846125125885	0.00471152737736702	0.007163203787058592	-0.04793458804488182	0.001943782321177423	0.07388410717248917	-0.12903569638729095	-0.0011771973222494125	0.07706035673618317	-0.15208131074905396	-0.0016026175580918789	0.04557326063513756	0.1266404539346695	-0.010962726548314095	0.003423907095566392	0.12498534470796585	0.020051583647727966	0.0032459814101457596	-0.013917314819991589	-0.04237029328942299	0.042695291340351105	-0.021014824509620667	0.04604825749993324	0.03969161957502365	-0.15364377200603485	-0.02845892310142517	0.05422450602054596	-0.15209046006202698	0.025494758039712906	0.057462479919195175	0.24724312126636505	-0.013854509219527245	-0.025440745055675507	0.2376948446035385	-0.013033254072070122	-0.022731084376573563	0.06469810754060745	-0.04194722697138786	0.015504281036555767	0.01647563837468624	-0.0633464902639389	0.022775636985898018	-0.016668962314724922	-0.03886132687330246	0.004752353765070438	-0.03365512564778328
Dasypus kap 374825	0.27322307229042053	0.005312465596944094	-0.01848761737346649	0.132102370262146	0.004594577010720968	0.009508543647825718	-0.04452463239431381	0.0016330203507095575	0.07608779519796371	-0.12141027301549911	0.0023001614026725292	0.07760660350322723	-0.14954590797424316	-0.0011790138669312	0.051415398716926575	0.13009203970432281	-0.012963767163455486	0.0050194342620670795	0.12861481308937073	0.018340256065130234	0.006570565979927778	-0.014918426051735878	-0.04514536261558533	0.045993104577064514	-0.01958301104605198	0.04861794784665108	0.045908454805612564	-0.1483508050441742	-0.02497623674571514	0.0604671947658062	-0.15037402510643005	0.024418363347649574	0.060266584157943726	0.25025245547294617	-0.014996913261711597	-0.02287084236741066	0.23404328525066376	-0.014282419346272945	-0.022079624235630035	0.06780292093753815	-0.046982452273368835	0.018485592678189278	0.01890198513865471	-0.06834691017866135	0.019273899495601654	-0.013251016847789288	-0.04173697531223297	0.005376286804676056	-0.031797029078006744
Dasypus kap 9271	0.2646123766899109	0.00678572291508317	-0.017635196447372437	0.1292005032300949	0.004626525100320578	0.005930336657911539	-0.04538000375032425	0.0023981586564332247	0.07506722211837769	-0.12879489362239838	-8.72203498147428E-4	0.07763581722974777	-0.1557701975107193	6.170956767164171E-4	0.04829194396734238	0.1249096468091011	-0.009983822703361511	0.004225957673043013	0.12795940041542053	0.017540445551276207	0.0027194900903850794	-0.010827322490513325	-0.04203218221664429	0.0389213040471077	-0.012618521228432655	0.04387543722987175	0.040935955941677094	-0.15153898298740387	-0.02360781654715538	0.06430234760046005	-0.15130458772182465	0.0228495504707098	0.06308344751596451	0.25112342834472656	-0.009875229559838772	-0.025114433839917183	0.2346489280462265	-0.009986082091927528	-0.024617929011583328	0.06479009240865707	-0.04215538501739502	0.016972748562693596	0.017830252647399902	-0.060362134128808975	0.021007154136896133	-0.016148220747709274	-0.038044337183237076	0.006622737739235163	-0.033249057829380035
Dasypus kap 20962	0.27050289511680603	0.0072590322233736515	-0.0201816875487566	0.14598795771598816	0.004854773171246052	0.0017058938974514604	-0.05045340582728386	0.0033569575753062963	0.07107260823249817	-0.12170196324586868	-5.620581214316189E-4	0.07411523163318634	-0.1500994712114334	-0.0018742530373856425	0.0369536429643631	0.13977910578250885	-0.01055336557328701	-9.460441651754081E-4	0.13945458829402924	0.019020533189177513	-0.0016272645443677902	-0.024335552006959915	-0.04262030869722366	0.041982512921094894	-0.02230326645076275	0.04481126740574837	0.04112109914422035	-0.1447014957666397	-0.02738047204911709	0.05715091899037361	-0.14628055691719055	0.026289314031600952	0.0581711083650589	0.2527913749217987	-0.012549915350973606	-0.024655131623148918	0.23591968417167664	-0.012923085130751133	-0.023475322872400284	0.0618840791285038	-0.04570029303431511	0.015934715047478676	0.01441559474915266	-0.06702269613742828	0.0213021133095026	-0.01913093961775303	-0.04133131355047226	0.00992625206708908	-0.03894251957535744
Dasypus kap 14-4-25-87	0.27149447798728943	0.00481347506865859	-0.019466212019324303	0.12982119619846344	0.004144664388149977	0.0063832844607532024	-0.05114034190773964	0.003575344802811742	0.07637699693441391	-0.12720023095607758	-0.0022894549183547497	0.07946372032165527	-0.15055374801158905	-0.0025735185481607914	0.04854210466146469	0.12657082080841064	-0.008468014188110828	0.005027445964515209	0.1243840679526329	0.017199253663420677	0.0056751798838377	-0.014621795155107975	-0.04079314321279526	0.042069751769304276	-0.014301907271146774	0.04553154483437538	0.04115814343094826	-0.15258975327014923	-0.02984296716749668	0.05996260046958923	-0.14916805922985077	0.020022977143526077	0.06364259868860245	0.25517573952674866	-0.014645404182374477	-0.023987052962183952	0.23172399401664734	-0.01270693726837635	-0.02022339217364788	0.06130398437380791	-0.044793687760829926	0.01809004880487919	0.020567605271935463	-0.06342846900224686	0.017161861062049866	-0.01491992361843586	-0.03871485963463783	0.007658361457288265	-0.03184301406145096
Dasypus kap 80-5-6-71	0.27548009157180786	0.006856867112219334	-0.023311451077461243	0.12346739321947098	0.00498175760731101	0.009523359127342701	-0.046168822795152664	-7.903565419837832E-4	0.0738920122385025	-0.1223304495215416	7.171953329816461E-4	0.07848064601421356	-0.1457636058330536	-8.418913348577917E-4	0.04033881053328514	0.12509632110595703	-0.00812536757439375	0.006899151019752026	0.12534750998020172	0.016194375231862068	0.006464406382292509	-0.015989193692803383	-0.043152693659067154	0.03964158892631531	-0.015794290229678154	0.046559762209653854	0.038582973182201385	-0.14409136772155762	-0.025044981390237808	0.0623122900724411	-0.14411810040473938	0.024217015132308006	0.06271301954984665	0.2580798268318176	-0.011112619191408157	-0.027438074350357056	0.23677948117256165	-0.012156740762293339	-0.027887625619769096	0.05308741703629494	-0.049427762627601624	0.020861029624938965	0.010796778835356236	-0.06396973133087158	0.02281819097697735	-0.016250161454081535	-0.03995427489280701	0.0059615918435156345	-0.03184669092297554
Dasypus kap 67-4-29-1	0.2784670293331146	0.008824090473353863	-0.022895099595189095	0.13755743205547333	0.0028894308488816023	0.008094508200883865	-0.05285314470529556	2.2694568906445056E-4	0.07434185594320297	-0.12404492497444153	6.719930097460747E-4	0.0739971250295639	-0.14958509802818298	0.0016951317666098475	0.045916832983493805	0.12811078131198883	-0.010769336484372616	0.005820333957672119	0.1244635209441185	0.019149865955114365	0.006459501106292009	-0.017640089616179466	-0.04470231756567955	0.040100183337926865	-0.018867922946810722	0.04706353694200516	0.04220806434750557	-0.14345483481884003	-0.021663984283804893	0.060373421758413315	-0.14346088469028473	0.022457551211118698	0.05923745408654213	0.26028206944465637	-0.014089648611843586	-0.026471858844161034	0.23661412298679352	-0.012537381611764431	-0.024067319929599762	0.05783192440867424	-0.049978043884038925	0.015913287177681923	0.01171475276350975	-0.06951697170734406	0.021557271480560303	-0.018999597057700157	-0.042031899094581604	0.00900297798216343	-0.03469378128647804
Dasypus nov 32356	0.2695087790489197	0.007830609567463398	-0.030086880549788475	0.1303507685661316	0.003508786205202341	0.014029008336365223	-0.050936080515384674	0.0016574646579101682	0.08197566121816635	-0.1300237774848938	0.001184749766252935	0.07592550665140152	-0.15635070204734802	-0.0011747563257813454	0.04647331312298775	0.12803596258163452	-0.0074579850770533085	0.012135558761656284	0.12634418904781342	0.01516927033662796	0.013291381299495697	-0.017141835764050484	-0.054438911378383636	0.040616586804389954	-0.01871080882847309	0.05563811957836151	0.03980589658021927	-0.15362614393234253	-0.02924763597548008	0.05888558551669121	-0.15438763797283173	0.027494702488183975	0.05939377471804619	0.24616827070713043	-0.011709771119058132	-0.029437357559800148	0.22662068903446198	-0.010226682759821415	-0.02442161552608013	0.06444516777992249	-0.056313253939151764	0.021183345466852188	0.026766497641801834	-0.0760829970240593	0.01792672462761402	-0.019710512831807137	-0.04672490805387497	0.006748863495886326	-0.029373962432146072
Dasypus nov 37356	0.2586103677749634	0.0075027733109891415	-0.01997547782957554	0.1313556283712387	0.0038992331828922033	0.008219758979976177	-0.04765860363841057	7.222804124467075E-4	0.08533801883459091	-0.12423412501811981	0.0011763862567022443	0.08533835411071777	-0.1510944664478302	-0.0012146143708378077	0.05524811893701553	0.12378561496734619	-0.006984663661569357	0.008712000213563442	0.12426643073558807	0.017216626554727554	0.00932394154369831	-0.013651183806359768	-0.0534244067966938	0.044719502329826355	-0.015136919915676117	0.055528026074171066	0.042683765292167664	-0.1492636650800705	-0.02936023660004139	0.06738924235105515	-0.1523057222366333	0.026715517044067383	0.06685209274291992	0.23920783400535583	-0.013210555538535118	-0.024375874549150467	0.21795715391635895	-0.01441697496920824	-0.021612290292978287	0.06058438867330551	-0.05576037988066673	0.021036965772509575	0.021878696978092194	-0.07490666210651398	0.019809596240520477	-0.02204667218029499	-0.04535200446844101	0.0125198969617486	-0.0291882436722517
Dasypus nov 133329	0.2690328061580658	0.0049042776226997375	-0.026015209034085274	0.1363290250301361	0.004078184720128775	0.014224021695554256	-0.048265259712934494	0.00148970284499228	0.0774674192070961	-0.13000616431236267	-0.0013645740691572428	0.07185553759336472	-0.15650735795497894	-0.0031671645119786263	0.045180466026067734	0.1298283040523529	-0.010183215141296387	0.01573096588253975	0.1285635232925415	0.018726643174886703	0.015483732335269451	-0.010981148108839989	-0.04502369835972786	0.044266700744628906	-0.013446641154587269	0.04833010211586952	0.044724587351083755	-0.15934117138385773	-0.026710545644164085	0.0560431182384491	-0.1586904078722	0.024957885965704918	0.056723907589912415	0.2484082281589508	-0.014076421968638897	-0.028588520362973213	0.21867141127586365	-0.013098698109388351	-0.021030660718679428	0.06854669749736786	-0.055882278829813004	0.015466035343706608	0.025712529197335243	-0.0711478665471077	0.010321024805307388	-0.02054213173687458	-0.036418963223695755	-0.005538346711546183	-0.028589576482772827
Dasypus nov 91707	0.2564454674720764	0.0083449212834239	-0.024857865646481514	0.1390690952539444	0.002891613868996501	0.008025902323424816	-0.04663291200995445	0.0011094410438090563	0.08609122782945633	-0.1273552030324936	7.694181986153126E-4	0.07963039726018906	-0.15712149441242218	-0.002011692151427269	0.053874365985393524	0.13312381505966187	-0.007419096305966377	0.009395599365234375	0.13401228189468384	0.015114542096853256	0.007526892237365246	-0.01513298973441124	-0.05518436059355736	0.04443453997373581	-0.01389398891478777	0.056571707129478455	0.048117417842149734	-0.15137088298797607	-0.029763206839561462	0.060686174780130386	-0.1514342576265335	0.02877216413617134	0.06104306876659393	0.23945024609565735	-0.010931086726486683	-0.02602936141192913	0.22432129085063934	-0.01020114403218031	-0.021560996770858765	0.0753290131688118	-0.05195816233754158	0.01812415011227131	0.02416890859603882	-0.07229425758123398	0.017160547897219658	-0.018843013793230057	-0.04750070720911026	7.702805451117456E-4	-0.032193370163440704
Dasypus nov 14663	0.27631187438964844	0.0031009120866656303	-0.027487320825457573	0.12995612621307373	0.0028975282330065966	0.011765541508793831	-0.051081396639347076	0.0026642645243555307	0.08216878026723862	-0.12625925242900848	-3.521644975990057E-4	0.07865560799837112	-0.14943477511405945	-0.0024009086191654205	0.04846871271729469	0.12301969528198242	-0.00810650922358036	0.013752761296927929	0.12340511381626129	0.016660640016198158	0.014027331955730915	-0.013683568686246872	-0.047743748873472214	0.04563908278942108	-0.01742394082248211	0.04956645518541336	0.043308280408382416	-0.15189634263515472	-0.024983977898955345	0.06279615312814713	-0.15212129056453705	0.02333485521376133	0.06269815564155579	0.25375524163246155	-0.0146278515458107	-0.0324997678399086	0.2196378856897354	-0.012077463790774345	-0.027867311611771584	0.06095430254936218	-0.05626556649804115	0.018621401861310005	0.015732428058981895	-0.06944122165441513	0.020786849781870842	-0.019761351868510246	-0.039237186312675476	0.005159582011401653	-0.03391481935977936
Dasypus nov 40984	0.2700667679309845	0.004791928455233574	-0.025361083447933197	0.12698322534561157	0.00466923089697957	0.012536697089672089	-0.04343564808368683	0.0019805761985480785	0.07776511460542679	-0.11752378195524216	6.743579870089889E-4	0.08435949683189392	-0.14971670508384705	-0.0010903786169365048	0.04643402621150017	0.1215926930308342	-0.009617336094379425	0.013601294718682766	0.1232132762670517	0.017871204763650894	0.01255565695464611	-0.027880709618330002	-0.050406765192747116	0.044193558394908905	-0.02535882778465748	0.05355421081185341	0.04013041779398918	-0.14400112628936768	-0.025642065331339836	0.06765168160200119	-0.14554454386234283	0.02416473627090454	0.06731957197189331	0.2487671673297882	-0.014429504051804543	-0.025199053809046745	0.22747592628002167	-0.012860402464866638	-0.021236920729279518	0.0669529065489769	-0.05504501238465309	0.01930851675570011	0.02249704673886299	-0.07725697755813599	0.015591725707054138	-0.017368176952004433	-0.04651520401239395	0.007012640591710806	-0.034868273884058
Dasypus nov 133261	0.2285819947719574	0.0046326336450874805	-0.020921483635902405	0.13851627707481384	0.002173874992877245	0.0134145338088274	-0.039306338876485825	0.004837292246520519	0.09111550450325012	-0.1458626687526703	0.0012287299614399672	0.0881400853395462	-0.17656080424785614	-0.0015329404268413782	0.050617970526218414	0.13196763396263123	-0.01665739342570305	0.013326140120625496	0.13182920217514038	0.023003702983260155	0.01433483324944973	0.0027064031455665827	-0.06334906816482544	0.04404793679714203	0.0012807563180103898	0.0707974061369896	0.04553886502981186	-0.1640898585319519	-0.036625273525714874	0.06731193512678146	-0.16368691623210907	0.03993411362171173	0.06513749808073044	0.21149103343486786	-0.014803249388933182	-0.025004565715789795	0.19441378116607666	-0.01752331666648388	-0.021193835884332657	0.07755838334560394	-0.06305284798145294	0.0242930818349123	0.039111584424972534	-0.08382595330476761	0.01109300833195448	-0.0027923667803406715	-0.05102973058819771	-0.003308767918497324	-0.02000206708908081
Dasypus nov 133338	0.2603452801704407	0.006972964853048325	-0.021499957889318466	0.14119850099086761	0.0038314112462103367	0.010351224802434444	-0.049952294677495956	6.794536020606756E-4	0.07724592089653015	-0.12431518733501434	-9.916579583659768E-4	0.0766371637582779	-0.1529969871044159	-0.0012877776753157377	0.043725237250328064	0.1394471377134323	-0.01241095457226038	0.007409701589494944	0.13851065933704376	0.018306555226445198	0.008239082992076874	-0.005523793399333954	-0.04729509353637695	0.044936053454875946	-0.007788424380123615	0.04961894452571869	0.04392905905842781	-0.15239165723323822	-0.025570126250386238	0.06323464959859848	-0.1546892672777176	0.022390538826584816	0.06250423938035965	0.24214205145835876	-0.012461069040000439	-0.024169640615582466	0.21995839476585388	-0.010381472297012806	-0.017897555604577065	0.07597135007381439	-0.048702966421842575	0.017098449170589447	0.03178836405277252	-0.0698854923248291	0.01037841010838747	-0.014952975325286388	-0.03926616907119751	5.383712123148143E-4	-0.026886198669672012
Dasypus nov 136252	0.2611084580421448	0.004989433102309704	-0.016882283613085747	0.13969005644321442	0.004363047890365124	0.008800976909697056	-0.04684407263994217	0.0011497668456286192	0.0752343162894249	-0.11840315908193588	3.3971041557379067E-4	0.0772102102637291	-0.1494995504617691	-6.286452990025282E-4	0.04326532781124115	0.14264743030071259	-0.007181452587246895	0.005712118931114674	0.14250755310058594	0.016489975154399872	0.005404073279350996	-0.013599704019725323	-0.04643714800477028	0.040559977293014526	-0.013722985051572323	0.04912976548075676	0.03624375909566879	-0.1484277993440628	-0.031150128692388535	0.0655115395784378	-0.14931941032409668	0.029075689613819122	0.06407324969768524	0.2440035045146942	-0.01406518928706646	-0.023388132452964783	0.2293383777141571	-0.012151327915489674	-0.01941850781440735	0.0652756616473198	-0.05131180211901665	0.015239358879625797	0.026143165305256844	-0.06964636594057083	0.01371122244745493	-0.02072623372077942	-0.0411674827337265	4.2678325553424656E-4	-0.031289707869291306
Dasypus nov 211668	0.26462531089782715	0.004644225351512432	-0.020436299964785576	0.1256435364484787	0.0037651648744940758	0.0227340254932642	-0.04290790855884552	0.0022658405359834433	0.08254530280828476	-0.12315213680267334	-0.002494867192581296	0.08411090821027756	-0.15062789618968964	-0.0013829097151756287	0.04135163873434067	0.12822522222995758	-0.014356589876115322	0.01884528622031212	0.12549759447574615	0.022467393428087234	0.01876627653837204	-0.01045894157141447	-0.05188602954149246	0.04251290485262871	-0.009543558582663536	0.054198529571294785	0.039476774632930756	-0.15096481144428253	-0.028485609218478203	0.06726175546646118	-0.15209273993968964	0.024945765733718872	0.0673687607049942	0.24240396916866302	-0.015887022018432617	-0.024789581075310707	0.22016239166259766	-0.015040061436593533	-0.01961332932114601	0.06705514341592789	-0.059140343219041824	0.016886452212929726	0.02634209208190441	-0.07689276337623596	0.01081522461026907	-0.010971912182867527	-0.041369881480932236	0.007605045102536678	-0.03338969871401787
Dasypus nov 211665	0.26097527146339417	0.006442871410399675	-0.024465732276439667	0.1360858678817749	0.0025367920752614737	0.011799358762800694	-0.05305470526218414	0.0021832953207194805	0.07369670271873474	-0.12492537498474121	0.0011249330127611756	0.07177476584911346	-0.15173298120498657	-0.0014347932301461697	0.04388453811407089	0.13047178089618683	-0.009088657796382904	0.012584359385073185	0.13381925225257874	0.014888235367834568	0.012196648865938187	-0.015526995062828064	-0.04576113447546959	0.044481970369815826	-0.015592949464917183	0.04813928157091141	0.044797297567129135	-0.14939530193805695	-0.026058733463287354	0.06087229400873184	-0.15003986656665802	0.025850810110569	0.059994280338287354	0.24262496829032898	-0.012644803151488304	-0.027596943080425262	0.21988248825073242	-0.012725317850708961	-0.02243145927786827	0.08444911241531372	-0.043657656759023666	0.017896408215165138	0.03074333816766739	-0.0685388520359993	0.012182341888546944	-0.016606397926807404	-0.041209299117326736	0.003713238053023815	-0.03415434807538986
Dasypus nov 211672	0.2606147527694702	0.005432100035250187	-0.019781002774834633	0.15008489787578583	0.005013137590140104	0.007077481132000685	-0.048581916838884354	9.827952599152923E-4	0.08085627108812332	-0.12947331368923187	-1.8941691087093204E-4	0.07650657743215561	-0.15586495399475098	-0.0025851037353277206	0.054225850850343704	0.14368003606796265	-0.00982852466404438	0.0060136523097753525	0.14416439831256866	0.016706204041838646	0.00542027223855257	-0.01077299378812313	-0.05318409204483032	0.04183933138847351	-0.009756946004927158	0.05709419026970863	0.0405130609869957	-0.1518946886062622	-0.029329750686883926	0.0615893118083477	-0.15318727493286133	0.027534419670701027	0.06340231746435165	0.24049027264118195	-0.014932921156287193	-0.020819950848817825	0.21696802973747253	-0.012955974787473679	-0.01664474606513977	0.06537945568561554	-0.05670757591724396	0.005656883120536804	0.02775682508945465	-0.06874065846204758	0.00859652366489172	-0.0101979561150074	-0.04350854456424713	-0.0013677867827937007	-0.02945554256439209
Dasypus nov 247661	0.25410667061805725	0.006202316377311945	-0.018515171483159065	0.148517906665802	0.0035118823871016502	0.008622822351753712	-0.03974839299917221	-0.0010406753281131387	0.07819066941738129	-0.11911669373512268	3.625199724410777E-6	0.07751847058534622	-0.15343855321407318	-0.0010669617913663387	0.04606267064809799	0.14491206407546997	-0.00862992461770773	0.007826333865523338	0.14376462996006012	0.016322540119290352	0.007541215978562832	-0.007865192368626595	-0.0491391196846962	0.03830225020647049	-0.007081216666847467	0.0504436232149601	0.03980636969208717	-0.15094085037708282	-0.02938053011894226	0.065006323158741	-0.1523614078760147	0.02828243188560009	0.06611818075180054	0.2413283735513687	-0.013318796642124653	-0.022265153005719185	0.21942666172981262	-0.012258416041731834	-0.017261143773794174	0.073509082198143	-0.05452371761202812	0.01478202547878027	0.03535182774066925	-0.07034855335950851	0.007668990641832352	-0.010401176288723946	-0.04194539040327072	0.0021217460744082928	-0.03620787709951401
Dasypus nov 262658	0.25883036851882935	0.005574869457632303	-0.014890742488205433	0.1443825662136078	0.00591597193852067	0.010382404550909996	-0.0438268706202507	0.00298419501632452	0.08180242776870728	-0.11485138535499573	6.451071822084486E-4	0.07983843982219696	-0.15131665766239166	-0.0024061216972768307	0.03382329270243645	0.14364522695541382	-0.011741113848984241	0.007073095068335533	0.1403394639492035	0.020106881856918335	0.008069941774010658	-0.009399978443980217	-0.05028678849339485	0.04163163900375366	-0.011667381040751934	0.053444527089595795	0.042646072804927826	-0.1493428349494934	-0.030689606443047523	0.06068276986479759	-0.1487354189157486	0.02715049497783184	0.06454409658908844	0.23622332513332367	-0.014327931217849255	-0.019751667976379395	0.22233515977859497	-0.013303049840033054	-0.016397105529904366	0.07428562641143799	-0.05491216480731964	0.017091501504182816	0.028749754652380943	-0.0745416134595871	0.010904582217335701	-0.016303960233926773	-0.043636832386255264	0.002318836748600006	-0.034101102501153946
Dasypus nov 263287	0.2637101113796234	0.006333565805107355	-0.026127342134714127	0.14260844886302948	0.004505867604166269	0.006814734078943729	-0.050202496349811554	8.688769885338843E-4	0.07512502372264862	-0.12613797187805176	-0.0015663981903344393	0.07203365117311478	-0.15327636897563934	-0.0020154276862740517	0.04209043085575104	0.14157843589782715	-0.008867377415299416	0.004167482722550631	0.13964499533176422	0.0165754072368145	0.005082737188786268	-0.012375480495393276	-0.04555550590157509	0.044426582753658295	-0.013415292836725712	0.04862690716981888	0.04244344308972359	-0.15107104182243347	-0.027461234480142593	0.05741594731807709	-0.1524135321378708	0.024934912100434303	0.05824393033981323	0.24597500264644623	-0.012173688039183617	-0.02931467443704605	0.2281617373228073	-0.011098082177340984	-0.024562103673815727	0.07720929384231567	-0.04171010106801987	0.021171335130929947	0.02303273044526577	-0.06755698472261429	0.019884295761585236	-0.01384431216865778	-0.04367662966251373	0.006909999996423721	-0.03240920975804329
Dasypus nov 98515	0.25389012694358826	0.005890717264264822	-0.028981424868106842	0.1283407062292099	0.0039966171607375145	0.013937968760728836	-0.04780241847038269	0.002756143221631646	0.07530011236667633	-0.13046419620513916	-0.0017595401732251048	0.0776158943772316	-0.16164691746234894	-0.0022462299093604088	0.05297825485467911	0.13006578385829926	-0.008497394621372223	0.010962093248963356	0.1309564858675003	0.015376098453998566	0.010056332685053349	-0.011662134900689125	-0.05309365317225456	0.04185979813337326	-0.013102259486913681	0.056854214519262314	0.039357732981443405	-0.15416385233402252	-0.031050892546772957	0.062225330621004105	-0.15283207595348358	0.02992251142859459	0.06236092373728752	0.2354775071144104	-0.014621781185269356	-0.031030194833874702	0.2251550555229187	-0.01252576895058155	-0.026519395411014557	0.05746164545416832	-0.055960770696401596	0.020395252853631973	0.025485236197710037	-0.07098011672496796	0.014148828573524952	-0.007856306619942188	-0.04385232552886009	0.0032902949023991823	-0.02814328484237194
Dasypus nov 144828	0.2596205770969391	0.005825006403028965	-0.028279922902584076	0.1364545077085495	0.00412996718659997	0.011727990582585335	-0.045128002762794495	0.0014852192252874374	0.08153074979782104	-0.12819480895996094	-0.0017836050828918815	0.08117251098155975	-0.15386252105236053	-0.0015114124398678541	0.05899186432361603	0.13702674210071564	-0.006746021099388599	0.009599201381206512	0.13924670219421387	0.01453174464404583	0.007777926977723837	-0.011381116695702076	-0.05566641688346863	0.0412687249481678	-0.014242389239370823	0.059293534606695175	0.038047172129154205	-0.14716725051403046	-0.029346751049160957	0.06696796417236328	-0.14786545932292938	0.030269496142864227	0.06669538468122482	0.22923308610916138	-0.013301736675202847	-0.029610712081193924	0.22281542420387268	-0.01162790134549141	-0.022310521453619003	0.06732166558504105	-0.05499384179711342	0.018575545400381088	0.019230632111430168	-0.07281291484832764	0.01698208600282669	-0.017659923061728477	-0.04548686742782593	-0.004239861387759447	-0.03159085661172867
Dasypus nov 133328	0.2557660639286041	0.0072594890370965	-0.02475251816213131	0.14011187851428986	0.004624899476766586	0.012103397399187088	-0.04265613853931427	0.002467410871759057	0.08173838257789612	-0.1273345947265625	3.2092348556034267E-4	0.07545454800128937	-0.15725702047348022	7.670597406104207E-4	0.05582507327198982	0.137497216463089	-0.010297095403075218	0.009594162926077843	0.1356157511472702	0.01911153644323349	0.009749135933816433	-0.011085210368037224	-0.052486058324575424	0.041815631091594696	-0.0076858107931911945	0.05488291755318642	0.03860347718000412	-0.1547778993844986	-0.029468435794115067	0.06221776083111763	-0.15504410862922668	0.030271140858530998	0.06165185570716858	0.2361721396446228	-0.012881485745310783	-0.02762928418815136	0.2216842919588089	-0.012958601117134094	-0.023007187992334366	0.0753718689084053	-0.05156731233000755	0.017984477803111076	0.028936950489878654	-0.07260414958000183	0.010689266957342625	-0.013894341886043549	-0.04436374455690384	-6.039407890057191E-5	-0.02928326092660427
Dasypus nov 205726	0.27224984765052795	0.007529908791184425	-0.022553088143467903	0.12949369847774506	0.0026947897858917713	0.013895256444811821	-0.05161279812455177	1.4574035594705492E-4	0.07506279647350311	-0.12343902885913849	9.753803897183388E-5	0.07948257774114609	-0.1538495123386383	-0.002002280903980136	0.04692754149436951	0.12865330278873444	-0.008938184939324856	0.011747772805392742	0.12770162522792816	0.015795202925801277	0.011722280643880367	-0.010762758553028107	-0.045797429978847504	0.0337868370115757	-0.011824572458863258	0.048441775143146515	0.03634122759103775	-0.14955595135688782	-0.029978126287460327	0.06227082014083862	-0.15095379948616028	0.027812082320451736	0.06293226778507233	0.2504870295524597	-0.012738607823848724	-0.026265444234013557	0.2292485386133194	-0.010762277990579605	-0.020570777356624603	0.07256874442100525	-0.0446268767118454	0.019969716668128967	0.026266014203429222	-0.06498594582080841	0.011416321620345116	-0.01503670308738947	-0.03890662267804146	0.004295046441257	-0.031120648607611656
Dasypus nov 133265	0.2631009519100189	0.005469620227813721	-0.02689824253320694	0.1302919238805771	0.004482955671846867	0.013891730457544327	-0.04255347698926926	0.002041164319962263	0.07731591910123825	-0.12854744493961334	6.241568480618298E-4	0.07659006118774414	-0.1543383002281189	-0.0011195929255336523	0.0547829233109951	0.12087468057870865	-0.0038730523083359003	0.01691322587430477	0.12162315845489502	0.013432057574391365	0.016572147607803345	-0.007864446379244328	-0.05149500444531441	0.03847014904022217	-0.012159344740211964	0.05448504164814949	0.03751768544316292	-0.1518857628107071	-0.0273562204092741	0.05862918123602867	-0.1514817327260971	0.02700549177825451	0.058673642575740814	0.24666251242160797	-0.01378563791513443	-0.027240656316280365	0.22841708362102509	-0.011898712255060673	-0.022497549653053284	0.06755071133375168	-0.051673728972673416	0.01689995639026165	0.02587135322391987	-0.07058907300233841	0.01265211496502161	-0.015097308903932571	-0.041823770850896835	0.004365117754787207	-0.030156102031469345
Dasypus nov 93116	0.26381587982177734	0.006375099532306194	-0.019321968778967857	0.13509300351142883	0.004071745090186596	0.01080217957496643	-0.04708359017968178	-0.0010667481692507863	0.07620372623205185	-0.12186476588249207	-7.574608316645026E-4	0.07882891595363617	-0.15406768023967743	-0.0032341759651899338	0.04394404962658882	0.13636036217212677	-0.010837842710316181	0.007035069167613983	0.13552306592464447	0.019845543429255486	0.007235141005367041	-0.009442606009542942	-0.05009690299630165	0.04413707181811333	-0.015364769846200943	0.05298973247408867	0.04084568843245506	-0.1499577760696411	-0.02898797206580639	0.06281492114067078	-0.15108145773410797	0.02446972019970417	0.06549792736768723	0.24323250353336334	-0.012968177907168865	-0.02154349535703659	0.22728413343429565	-0.012806033715605736	-0.018680255860090256	0.07147195935249329	-0.049257371574640274	0.020930591970682144	0.026400437578558922	-0.0668567568063736	0.013309882022440434	-0.017362678423523903	-0.040180470794439316	0.006967762019485235	-0.032590996474027634
Dasypus nov 133259	0.25075072050094604	0.005530535243451595	-0.021117396652698517	0.14366693794727325	0.0033308938145637512	0.012264873832464218	-0.0411108061671257	0.0029957250226289034	0.08374589681625366	-0.13442862033843994	-2.1828811441082507E-4	0.08336207270622253	-0.15719351172447205	-0.0013848767848685384	0.062084540724754333	0.13869579136371613	-0.010332430712878704	0.01053601410239935	0.13956992328166962	0.017281178385019302	0.011651819571852684	-0.0060313306748867035	-0.05784009024500847	0.03454487398266792	-0.006672955118119717	0.061997342854738235	0.03662726283073425	-0.15058593451976776	-0.028979940339922905	0.0697496086359024	-0.1523796170949936	0.023885751143097878	0.06939393281936646	0.23325186967849731	-0.014700337313115597	-0.022969352081418037	0.21277597546577454	-0.013510523363947868	-0.016190752387046814	0.0685323178768158	-0.05943195894360542	0.0161734689027071	0.02849212847650051	-0.07532577216625214	0.009237035177648067	-0.010749048553407192	-0.04612153023481369	-0.0030633530113846064	-0.02825305238366127
Dasypus nov 93735	0.2643979787826538	0.0060525983572006226	-0.028238458558917046	0.140995591878891	0.0037319676484912634	0.005808406975120306	-0.049483608454465866	8.028536103665829E-4	0.07816214859485626	-0.13103410601615906	-0.0012204729719087481	0.07063369452953339	-0.1583854854106903	-0.0031493159476667643	0.03619437292218208	0.13538488745689392	-0.005792840383946896	0.006482800934463739	0.13427121937274933	0.012494930066168308	0.0071115982718765736	-0.013441922143101692	-0.04900949448347092	0.04205342382192612	-0.018672840669751167	0.051535364240407944	0.042087193578481674	-0.1597728729248047	-0.027931014075875282	0.0523652620613575	-0.1572464406490326	0.026032891124486923	0.05296036973595619	0.2454727590084076	-0.012251379899680614	-0.031561437994241714	0.22873009741306305	-0.009874653071165085	-0.024351797997951508	0.06930180639028549	-0.04494250938296318	0.021607456728816032	0.02432447113096714	-0.06900815665721893	0.0164913609623909	-0.018861105665564537	-0.04098048433661461	0.006837627850472927	-0.031237352639436722
Dasypus nov 365	0.2645074427127838	0.004630011040717363	-0.023027315735816956	0.14180943369865417	0.0031734404619783163	0.010612941347062588	-0.04678737372159958	1.0828646918525919E-4	0.07384432107210159	-0.1182069480419159	-2.0223201136104763E-4	0.07394198328256607	-0.1492963582277298	-0.0031884144991636276	0.04084186255931854	0.13739652931690216	-0.010110834613442421	0.01004093699157238	0.13664120435714722	0.018283914774656296	0.006739788688719273	-0.014354336075484753	-0.04878583177924156	0.03877180442214012	-0.014594513922929764	0.05193163454532623	0.039788030087947845	-0.14396871626377106	-0.028376292437314987	0.060330431908369064	-0.14695653319358826	0.02623514086008072	0.05899222940206528	0.24122737348079681	-0.014736145734786987	-0.024215586483478546	0.22767262160778046	-0.014529429376125336	-0.02081075869500637	0.06742014735937119	-0.055978503078222275	0.01996714435517788	0.025946686044335365	-0.07535278797149658	0.01409868337213993	-0.015257921069860458	-0.04046843573451042	0.003390429075807333	-0.029370445758104324
Dasypus nov 133330	0.2636711299419403	0.008022749796509743	-0.02639174833893776	0.143049955368042	0.0031077954918146133	0.008829467929899693	-0.05050543323159218	0.0011485300492495298	0.07764677703380585	-0.13109633326530457	-0.003524758853018284	0.07590778917074203	-0.15506848692893982	-0.0015658637275919318	0.040190380066633224	0.14135871827602386	-0.010415073484182358	0.00691163120791316	0.13828907907009125	0.01831432804465294	0.007961032912135124	-0.010542057454586029	-0.04906219616532326	0.040168825536966324	-0.014692799188196659	0.04883944243192673	0.04487171024084091	-0.15641343593597412	-0.028029920533299446	0.05826472491025925	-0.15719632804393768	0.02293252944946289	0.05968393012881279	0.24585504829883575	-0.010174337774515152	-0.02707284688949585	0.22899889945983887	-0.01074001844972372	-0.0236055850982666	0.07229112833738327	-0.04951067641377449	0.018085410818457603	0.024650808423757553	-0.06953469663858414	0.012907004915177822	-0.01697068102657795	-0.04260936379432678	0.004694272764027119	-0.02959361858665943
Dasypus nov 133381	0.25884056091308594	0.005343728233128786	-0.02075265534222126	0.13170962035655975	0.004052859265357256	0.013884494081139565	-0.04598785564303398	8.653659606352448E-4	0.07689587026834488	-0.12464135885238647	-8.372266311198473E-4	0.07859554141759872	-0.15398094058036804	-3.3419227111153305E-4	0.047553107142448425	0.1289626508951187	-0.007012478541582823	0.01366385817527771	0.1264951378107071	0.015495384112000465	0.014383778907358646	-0.007401499897241592	-0.0519304983317852	0.040084946900606155	-0.013878267258405685	0.05530622601509094	0.04611438140273094	-0.149395152926445	-0.028994759544730186	0.06150950491428375	-0.15024743974208832	0.025741297751665115	0.06222616508603096	0.24151626229286194	-0.013879160396754742	-0.025955738499760628	0.22589068114757538	-0.01204025186598301	-0.02115440182387829	0.07435384392738342	-0.04901670664548874	0.019618362188339233	0.025848165154457092	-0.07387424260377884	0.010967268608510494	-0.01594584435224533	-0.044028572738170624	0.004221503157168627	-0.028157956898212433
Dasypus nov 133341	0.2675397992134094	0.007128083147108555	-0.019145598635077477	0.14548943936824799	0.003965943120419979	0.009171448647975922	-0.044721122831106186	-7.368387305177748E-4	0.07870461791753769	-0.12608495354652405	-0.001256735878996551	0.07785874605178833	-0.15472757816314697	-3.78983560949564E-4	0.0451756976544857	0.13632555305957794	-0.011197802610695362	0.006871501449495554	0.13607348501682281	0.017733953893184662	0.009591605514287949	-0.011002538725733757	-0.0475059449672699	0.043588604778051376	-0.011526977643370628	0.049720220267772675	0.03910994157195091	-0.15254804491996765	-0.02413245476782322	0.06622602045536041	-0.15256893634796143	0.021917346864938736	0.06687944382429123	0.24517689645290375	-0.010154370218515396	-0.022950289770960808	0.22666405141353607	-0.010140531696379185	-0.01880159229040146	0.06830380856990814	-0.05385180190205574	0.01046056766062975	0.029701758176088333	-0.06841886788606644	0.015585298649966717	-0.010907715186476707	-0.039458297193050385	0.004960564896464348	-0.028020264580845833
Dasypus nov 93118	0.26329976320266724	0.0067182001657783985	-0.024733291938900948	0.1294819861650467	0.003371537197381258	0.013529524207115173	-0.04652649164199829	0.0014917488442733884	0.08174452185630798	-0.1318252831697464	0.002555741462856531	0.07680715620517731	-0.15918055176734924	6.779742398066446E-5	0.04237585887312889	0.12713328003883362	-0.012899603694677353	0.012894128449261189	0.1283753514289856	0.01829174906015396	0.011828947812318802	-0.01172566320747137	-0.05384001135826111	0.04229448363184929	-0.013006397522985935	0.05700976029038429	0.041804052889347076	-0.15204983949661255	-0.028162436559796333	0.06034103408455849	-0.1543184220790863	0.025170421227812767	0.06362944096326828	0.24352051317691803	-0.01332353800535202	-0.026529306545853615	0.2250724881887436	-0.012689702212810516	-0.021660948172211647	0.06993653625249863	-0.054912008345127106	0.016203144565224648	0.02384777180850506	-0.07320348918437958	0.01303105615079403	-0.014817549847066402	-0.04326702654361725	0.001895091962069273	-0.03388340398669243
Dasypus nov 133342	0.2639352083206177	0.0073862806893885136	-0.019585998728871346	0.1372220665216446	0.0034726697485893965	0.01242824923247099	-0.04708871990442276	6.738625816069543E-4	0.07805366814136505	-0.1273309290409088	-0.0032146507874131203	0.07861713320016861	-0.15573592483997345	-7.842759951017797E-4	0.04092060402035713	0.14064127206802368	-0.013646014966070652	0.005923006217926741	0.13881346583366394	0.018595898523926735	0.0089027751237154	-0.0067250533029437065	-0.04811440408229828	0.04244275763630867	-0.012157166376709938	0.050088152289390564	0.039146896451711655	-0.14988718926906586	-0.026942547410726547	0.06399783492088318	-0.1496942639350891	0.023541776463389397	0.06554538011550903	0.24250824749469757	-0.012324849143624306	-0.022341441363096237	0.22649630904197693	-0.011745469644665718	-0.019741086289286613	0.07395485788583755	-0.04825673624873161	0.01699490286409855	0.03145334869623184	-0.06796564906835556	0.01496956218034029	-0.015873849391937256	-0.04140597954392433	0.0020045593846589327	-0.03211423382163048
Dasypus nov 133266	0.260745644569397	0.007080611307173967	-0.021186675876379013	0.1335098296403885	0.004669674206525087	0.014140300452709198	-0.0467776395380497	0.0016867757076397538	0.07775086164474487	-0.12062306702136993	6.960426107980311E-4	0.08109868317842484	-0.15571878850460052	5.245931097306311E-4	0.0461646243929863	0.13193634152412415	-0.005336085334420204	0.014909319579601288	0.1317611038684845	0.014020003378391266	0.015003262087702751	-0.011515301652252674	-0.05155177041888237	0.0403890386223793	-0.01598227769136429	0.05238354206085205	0.04301518201828003	-0.14818023145198822	-0.026522139087319374	0.07025475800037384	-0.1457715481519699	0.027872372418642044	0.06802985072135925	0.23997163772583008	-0.011607029475271702	-0.022795075550675392	0.22847971320152283	-0.012275366112589836	-0.020949533209204674	0.0743761882185936	-0.055213406682014465	0.018236860632896423	0.02978169359266758	-0.07382231205701828	0.00619873683899641	-0.01602768525481224	-0.0417388491332531	-2.2184543195180595E-4	-0.03207690268754959
Dasypus nov 133397	0.2679130733013153	0.0063164555467665195	-0.027645977213978767	0.13041505217552185	0.004460964817553759	0.014968742616474628	-0.05044287443161011	0.0020954981446266174	0.0749289020895958	-0.12520772218704224	3.163340734317899E-4	0.07844385504722595	-0.1517290323972702	-3.7504994543269277E-4	0.044123727828264236	0.12386387586593628	-0.009377873502671719	0.016330569982528687	0.12637361884117126	0.016973193734884262	0.014881785027682781	-0.011333050206303596	-0.04515230283141136	0.042916011065244675	-0.013427773490548134	0.04767130687832832	0.043717965483665466	-0.1511545330286026	-0.027770036831498146	0.06218434497714043	-0.15142960846424103	0.0263836532831192	0.06269717961549759	0.2500772774219513	-0.011249413713812828	-0.02886057272553444	0.22461751103401184	-0.009541632607579231	-0.020963158458471298	0.0735098347067833	-0.047375425696372986	0.022240370512008667	0.027381081134080887	-0.07118535786867142	0.01209150068461895	-0.0178066473454237	-0.04030735045671463	0.0029526951257139444	-0.03188522532582283
Dasypus nov 91710	0.2666108012199402	0.008701082319021225	-0.01706348918378353	0.138413205742836	0.002684094710275531	0.009861834347248077	-0.04443943500518799	0.001139722764492035	0.07355654239654541	-0.11808527261018753	0.001290706335566938	0.0766088217496872	-0.1492280662059784	-0.0014421823434531689	0.04611610621213913	0.13054980337619781	-0.007585951127111912	0.010148814879357815	0.13107256591320038	0.014526947401463985	0.010227874852716923	-0.012481586076319218	-0.0519590824842453	0.03762563690543175	-0.013641397468745708	0.056175313889980316	0.038511455059051514	-0.14771471917629242	-0.028511978685855865	0.06336778402328491	-0.1482066810131073	0.026698775589466095	0.0634402483701706	0.24389442801475525	-0.009998884052038193	-0.02088283933699131	0.2300594598054886	-0.009521198458969593	-0.017643680796027184	0.06410178542137146	-0.058376818895339966	0.015367268584668636	0.020725054666399956	-0.07662969082593918	0.010136175900697708	-0.01872853748500347	-0.045340944081544876	0.00208777142688632	-0.033314600586891174
Dasypus nov 205727	0.273364782333374	0.004636950325220823	-0.02586313523352146	0.1346043348312378	0.002993130125105381	0.009469760581851006	-0.055407918989658356	3.4507064265199006E-4	0.07353101670742035	-0.12286733835935593	-0.0014022501418367028	0.07121699303388596	-0.15237292647361755	-0.0019894097931683064	0.03675561398267746	0.13356071710586548	-0.007898758165538311	0.007638145238161087	0.13273003697395325	0.014433196745812893	0.007944660261273384	-0.016086075454950333	-0.04565408080816269	0.0408598855137825	-0.02109348587691784	0.048162005841732025	0.04066872596740723	-0.14837343990802765	-0.028307996690273285	0.05586807057261467	-0.14965686202049255	0.0243831854313612	0.05573670566082001	0.2546595335006714	-0.013027425855398178	-0.027659539133310318	0.23332124948501587	-0.011595888063311577	-0.02333463728427887	0.07054842263460159	-0.047563813626766205	0.018002759665250778	0.018924888223409653	-0.06947697699069977	0.012396975420415401	-0.018588116392493248	-0.040997572243213654	0.0033964538015425205	-0.03417287766933441
Dasypus nov 262659	0.2586714029312134	0.005802482832223177	-0.016363069415092468	0.14499038457870483	0.002707140287384391	0.010126831009984016	-0.0438811331987381	0.0029004812240600586	0.08061045408248901	-0.12477079033851624	7.175309583544731E-4	0.08110670000314713	-0.15193241834640503	-0.0028350474312901497	0.05468709394335747	0.1368824541568756	-0.009023631922900677	0.010930255986750126	0.13734778761863708	0.015851769596338272	0.011125514283776283	-0.006710801273584366	-0.05082288384437561	0.038953837007284164	-0.010889158584177494	0.05368403345346451	0.03880690410733223	-0.14759737253189087	-0.030473805963993073	0.06290528923273087	-0.14960981905460358	0.029315343126654625	0.06450720876455307	0.23806850612163544	-0.013100331649184227	-0.021061770617961884	0.22324226796627045	-0.012039374560117722	-0.017147378996014595	0.06936068832874298	-0.055788394063711166	0.02043766714632511	0.028616340830922127	-0.07474754005670547	0.011834027245640755	-0.011318824253976345	-0.040701769292354584	9.893478127196431E-4	-0.028535611927509308
Dasypus nov 616093	0.2639515697956085	0.006313452031463385	-0.024935178458690643	0.13249710202217102	0.005826069042086601	0.01587357372045517	-0.05160195380449295	0.001431484124623239	0.07921133935451508	-0.11662165075540543	-0.0016575539484620094	0.0765211284160614	-0.15048058331012726	-9.380263509228826E-4	0.04462971165776253	0.13364364206790924	-0.007165074348449707	0.013345240615308285	0.1340337097644806	0.01810830645263195	0.011303458362817764	-0.029268886893987656	-0.05112278833985329	0.042004819959402084	-0.027670981362462044	0.0538601391017437	0.04117892310023308	-0.14340582489967346	-0.024799007922410965	0.06571494042873383	-0.14375373721122742	0.025530820712447166	0.06617937237024307	0.24636054039001465	-0.0161997452378273	-0.0286552794277668	0.22137615084648132	-0.01270108763128519	-0.02483825385570526	0.06709473580121994	-0.05626395717263222	0.02228599041700363	0.025848131626844406	-0.07700541615486145	0.013398469425737858	-0.017306627705693245	-0.04182571545243263	0.004022113047540188	-0.03405561298131943
Dasypus nov 838081	0.2606867253780365	0.005533205810934305	-0.02077089063823223	0.13730333745479584	0.003813426475971937	0.016319679096341133	-0.04650542512536049	0.0014340688940137625	0.07284452021121979	-0.12029838562011719	-6.401682621799409E-4	0.07980768382549286	-0.1486971527338028	-0.0016127197304740548	0.042655099183321	0.13869327306747437	-0.010482843965291977	0.011527971364557743	0.13811863958835602	0.01881309784948826	0.010934831574559212	-0.016082027927041054	-0.04698831960558891	0.03809989616274834	-0.019200947135686874	0.04762478545308113	0.039100583642721176	-0.14817585051059723	-0.031384870409965515	0.06034797802567482	-0.14931277930736542	0.02717551589012146	0.06325248628854752	0.24115008115768433	-0.014659491367638111	-0.024804316461086273	0.22607173025608063	-0.01446590293198824	-0.02049197070300579	0.06914359331130981	-0.055659741163253784	0.014139248989522457	0.029163174331188202	-0.0727221816778183	0.011801165528595448	-0.00981543492525816	-0.04107903316617012	0.003618692047894001	-0.030897991731762886
Dasypus nov 964067	0.26757991313934326	0.006671702489256859	-0.019384590908885002	0.12236382812261581	0.005245690234005451	0.016530752182006836	-0.04522112011909485	0.0010345617774873972	0.07373949140310287	-0.11895554512739182	4.8418674850836396E-4	0.08263923227787018	-0.15026769042015076	0.002007386414334178	0.05090789496898651	0.11825677752494812	-0.011280431412160397	0.016595665365457535	0.11888573318719864	0.021659651771187782	0.01573888212442398	-0.014180799014866352	-0.04915774613618851	0.04208335652947426	-0.015811752527952194	0.05059744417667389	0.03981553763151169	-0.14803414046764374	-0.02627701126039028	0.06841970235109329	-0.1452653408050537	0.026784976944327354	0.06839418411254883	0.24725325405597687	-0.012813658453524113	-0.02360435761511326	0.22273781895637512	-0.01061987690627575	-0.0194289218634367	0.06778262555599213	-0.05840851739048958	0.011723311617970467	0.0336424745619297	-0.0749891996383667	0.006575455889105797	-0.014137087389826775	-0.04381844028830528	0.002349546644836664	-0.030878614634275436
Dasypus nov 1995-953	0.26747867465019226	0.00690391194075346	-0.02573537454009056	0.12450926005840302	0.004040451720356941	0.011419284157454967	-0.04442274570465088	4.880199849139899E-4	0.08005797117948532	-0.12386652827262878	7.581004174426198E-4	0.07570595294237137	-0.1459815800189972	4.984228289686143E-4	0.06283597648143768	0.12011256068944931	-0.005935022607445717	0.013391086831688881	0.12123345583677292	0.013559265993535519	0.012541295029222965	-0.024445993825793266	-0.051722247153520584	0.04204646125435829	-0.027865059673786163	0.05328255891799927	0.043091509491205215	-0.15154364705085754	-0.02722175605595112	0.060959987342357635	-0.15065376460552216	0.025420336052775383	0.06279958039522171	0.24700522422790527	-0.011627339757978916	-0.025666020810604095	0.2254400998353958	-0.01181573886424303	-0.02439042553305626	0.06666862964630127	-0.05285768583416939	0.01838582754135132	0.02139655314385891	-0.07221800088882446	0.01815320923924446	-0.01425397489219904	-0.04623809829354286	0.004774743691086769	-0.0324268713593483
Dasypus nov 1996-587	0.26550596952438354	0.0074556064791977406	-0.019763940945267677	0.11580319702625275	0.002535327337682247	0.02363276109099388	-0.05162284895777702	3.3685346716083586E-4	0.08713217824697495	-0.12802939116954803	-0.0013284102315083146	0.08125045150518417	-0.14381809532642365	-7.988261641003191E-4	0.07117873430252075	0.12496481835842133	-0.007769034244120121	0.015767645090818405	0.12041111290454865	0.015996690839529037	0.01769675500690937	-0.024505119770765305	-0.05337619408965111	0.040749773383140564	-0.027189256623387337	0.05559451878070831	0.04048234969377518	-0.15419058501720428	-0.030888553708791733	0.06244310364127159	-0.15456707775592804	0.029635287821292877	0.06256289780139923	0.24810965359210968	-0.014829861000180244	-0.025670208036899567	0.22712013125419617	-0.013451075181365013	-0.022508816793560982	0.06874324381351471	-0.05604356527328491	0.01665235310792923	0.024638650938868523	-0.07765018939971924	0.013115047477185726	-0.014663401991128922	-0.045494578778743744	0.007864924147725105	-0.028554612770676613
Dasypus nov 1999-1069	0.2668918967247009	0.006323622539639473	-0.02061794139444828	0.11548950523138046	0.0026518795639276505	0.020806623622775078	-0.046673957258462906	-0.0011682793265208602	0.08220004290342331	-0.12023506313562393	-3.041191666852683E-4	0.08040131628513336	-0.1460602879524231	3.4261680411873385E-5	0.05555298924446106	0.11802724003791809	-0.010237565264105797	0.01787617988884449	0.11925563216209412	0.016335075721144676	0.01780655048787594	-0.02069687470793724	-0.05403192713856697	0.03993077948689461	-0.022945523262023926	0.05674047768115997	0.04130702093243599	-0.14899574220180511	-0.028956251218914986	0.06690765917301178	-0.15018640458583832	0.028344066813588142	0.06651023030281067	0.24839769303798676	-0.014706122688949108	-0.02546432428061962	0.23137164115905762	-0.014864671975374222	-0.023165179416537285	0.06766945868730545	-0.05693250522017479	0.018398381769657135	0.018547940999269485	-0.07279495894908905	0.019428132101893425	-0.017630673944950104	-0.04387647658586502	0.004337532911449671	-0.03133312985301018
Dasypus nov 2006-565	0.25908273458480835	0.0066544171422719955	-0.018260059878230095	0.15122415125370026	0.003005551639944315	0.0033415798097848892	-0.050151169300079346	7.542235543951392E-4	0.0782574862241745	-0.13129810988903046	0.001740510924719274	0.08022159337997437	-0.15324145555496216	-1.3251646305434406E-4	0.052834633737802505	0.1319977343082428	-0.008657843805849552	0.008924744091928005	0.1333153247833252	0.01629340834915638	0.008227760903537273	-0.012807488441467285	-0.04152286797761917	0.0401720255613327	-0.013683604076504707	0.046775560826063156	0.04202374815940857	-0.15793442726135254	-0.0254324059933424	0.0629890114068985	-0.1591416299343109	0.0201711468398571	0.06398996710777283	0.24135565757751465	-0.011010836809873581	-0.023567868396639824	0.22664707899093628	-0.012496879324316978	-0.019952332600951195	0.07223891466856003	-0.044785432517528534	0.018511207774281502	0.02831321209669113	-0.06788930296897888	0.011424204334616661	-0.01760544441640377	-0.03609833866357803	-0.005176381208002567	-0.026318682357668877
Dasypus nov 2007-371	0.2642703652381897	0.004556379746645689	-0.02606501616537571	0.12363815307617188	0.003737183753401041	0.01802695542573929	-0.05251530557870865	0.001575970440171659	0.08274758607149124	-0.12307851016521454	-0.0034796332474797964	0.07913311570882797	-0.1506647765636444	-0.0031265609432011843	0.05216098204255104	0.12446228414773941	-0.01193158607929945	0.014653252437710762	0.12426754087209702	0.019236885011196136	0.014352107420563698	-0.022118570283055305	-0.05263330414891243	0.03653504699468613	-0.025257151573896408	0.05628420040011406	0.036919742822647095	-0.14206048846244812	-0.028993332758545876	0.06569083780050278	-0.14311480522155762	0.02291182428598404	0.06706839799880981	0.24839910864830017	-0.014986726455390453	-0.027538586407899857	0.22415533661842346	-0.014337221160531044	-0.0219542495906353	0.07682513445615768	-0.048629019409418106	0.020650746300816536	0.022353224456310272	-0.07261288166046143	0.016321402043104172	-0.0225608441978693	-0.04321511834859848	0.0034953574649989605	-0.035959579050540924
Dasypus nov 2007-372	0.2647177577018738	0.007087835110723972	-0.03346739709377289	0.12459595501422882	0.0033027371391654015	0.019475964829325676	-0.056564219295978546	0.0013027384411543608	0.08470741659402847	-0.12313437461853027	-0.0014008581638336182	0.07560693472623825	-0.14808766543865204	-8.3199143409729E-4	0.052970077842473984	0.12636329233646393	-0.010992585681378841	0.01562567986547947	0.1278969943523407	0.01909402571618557	0.014544768258929253	-0.026384111493825912	-0.05327620729804039	0.039220672100782394	-0.030573645606637	0.055758245289325714	0.04560594633221626	-0.14398446679115295	-0.031601786613464355	0.059204403311014175	-0.14405904710292816	0.0330013781785965	0.05806843563914299	0.24836796522140503	-0.014174734242260456	-0.03192821517586708	0.22727829217910767	-0.014362986199557781	-0.026256099343299866	0.07641042023897171	-0.04886693134903908	0.023862769827246666	0.02286205254495144	-0.07217714935541153	0.01511490810662508	-0.01996845379471779	-0.04282119870185852	0.00376685312949121	-0.03346318006515503
Dasypus nov 2007-379	0.26917997002601624	0.007867752574384212	-0.026252295821905136	0.13279573619365692	0.0040083760395646095	0.01735900528728962	-0.044731635600328445	-1.897045294754207E-4	0.08008154481649399	-0.11456111818552017	2.7941795997321606E-4	0.079621322453022	-0.14862948656082153	1.325008925050497E-4	0.04888011887669563	0.13421942293643951	-0.006161410361528397	0.0153580941259861	0.13317133486270905	0.014408322982490063	0.015591001138091087	-0.026786189526319504	-0.05346827208995819	0.03351376950740814	-0.031933993101119995	0.05285106226801872	0.03560734912753105	-0.13902467489242554	-0.02446742169559002	0.06941108405590057	-0.14072711765766144	0.02381150797009468	0.07012373208999634	0.2504568099975586	-0.012686454690992832	-0.028859920799732208	0.22659118473529816	-0.013999511487782001	-0.026560470461845398	0.07250464707612991	-0.051301613450050354	0.02666935883462429	0.017902208492159843	-0.07586265355348587	0.01338796317577362	-0.02000565268099308	-0.04270249605178833	-3.0422543204622343E-5	-0.03532065823674202
Dasypus nov v3416	0.2648842930793762	0.006427548825740814	-0.023782657459378242	0.13154812157154083	0.0037108026444911957	0.011970117688179016	-0.060045864433050156	0.004090567585080862	0.08131897449493408	-0.12045092135667801	-0.0011182515881955624	0.07756302505731583	-0.14724890887737274	8.660221938043833E-4	0.039388515055179596	0.12974411249160767	-0.012560275383293629	0.00844209548085928	0.13120907545089722	0.019347436726093292	0.00825870968401432	-0.0265650637447834	-0.05067157745361328	0.045126233249902725	-0.02753920666873455	0.054072801023721695	0.04357675462961197	-0.14782357215881348	-0.031181655824184418	0.06361698359251022	-0.15104565024375916	0.027848219498991966	0.0617767870426178	0.24836339056491852	-0.013994785025715828	-0.028595244511961937	0.22571782767772675	-0.014844877645373344	-0.024777427315711975	0.06436508148908615	-0.054334692656993866	0.021868685260415077	0.0256026778370142	-0.0725034698843956	0.019464289769530296	-0.014417074620723724	-0.046165451407432556	0.011887683533132076	-0.029986368492245674
Dasypus nov v3418	0.26660147309303284	0.005036166403442621	-0.025731423869729042	0.13428160548210144	0.005643289070576429	0.006164602003991604	-0.047397490590810776	8.539010887034237E-4	0.08031075447797775	-0.1247180625796318	6.057865102775395E-4	0.0791844055056572	-0.14971251785755157	5.304163787513971E-4	0.04155120998620987	0.13357476890087128	-0.006261833943426609	0.006423239130526781	0.13945786654949188	0.012326816096901894	0.004149976652115583	-0.027937307953834534	-0.05198708921670914	0.03962773084640503	-0.03017261065542698	0.053806763142347336	0.04057947173714638	-0.15023434162139893	-0.030151328071951866	0.05937311425805092	-0.15540966391563416	0.02697009965777397	0.061534587293863297	0.24907515943050385	-0.006823934614658356	-0.02958884835243225	0.23583118617534637	-0.013303518295288086	-0.025667965412139893	0.06614761054515839	-0.050234366208314896	0.02002747729420662	0.02096196636557579	-0.0698959231376648	0.01805069111287594	-0.019079193472862244	-0.044285982847213745	0.0066328709945082664	-0.03228313475847244
Dasypus nov AM78	0.27462005615234375	0.007656094152480364	-0.020688695833086967	0.12731660902500153	0.0037323767319321632	0.014474807307124138	-0.04355759918689728	1.5098191215656698E-4	0.07970056682825089	-0.11933157593011856	-1.2695082114078104E-4	0.07811401784420013	-0.14809486269950867	-3.483207256067544E-4	0.05732254683971405	0.12493705004453659	-0.008409423753619194	0.01406812947243452	0.1278778463602066	0.01613118126988411	0.012587510049343109	-0.02790355123579502	-0.05091935023665428	0.03985337167978287	-0.02811969444155693	0.05211922153830528	0.04442325234413147	-0.14792689681053162	-0.022712061181664467	0.06489361077547073	-0.14743901789188385	0.024918487295508385	0.06451010704040527	0.25669634342193604	-0.010851303115487099	-0.02373155578970909	0.2295154631137848	-0.00996105931699276	-0.020754437893629074	0.06399106234312057	-0.05383222550153732	0.01704559661448002	0.02445458434522152	-0.07050004601478577	0.013779550790786743	-0.018804794177412987	-0.042746465653181076	0.003416117513552308	-0.03742276132106781
Dasypus nov AP207	0.2674351930618286	0.005431899335235357	-0.023065103217959404	0.11877968162298203	0.00239012879319489	0.014531017281115055	-0.04423048347234726	0.0018627435201779008	0.07768630981445312	-0.12206888198852539	8.873689512256533E-5	0.07993665337562561	-0.1528618037700653	-0.002010062802582979	0.051417652517557144	0.12705467641353607	-0.011334097944200039	0.00817234255373478	0.12847259640693665	0.017519459128379822	0.007491667289286852	-0.02284223586320877	-0.04486071318387985	0.04126714915037155	-0.028943143784999847	0.046986810863018036	0.04477297514677048	-0.1513957381248474	-0.032301176339387894	0.06653997302055359	-0.15325738489627838	0.031101170927286148	0.06577972322702408	0.24844597280025482	-0.01323625072836876	-0.024413634091615677	0.226088285446167	-0.01266720611602068	-0.021182715892791748	0.06824304163455963	-0.04523399472236633	0.016377652063965797	0.021443182602524757	-0.06939172744750977	0.016422683373093605	-0.019123168662190437	-0.038388442248106	0.003620969597250223	-0.02867788076400757
Dasypus nov 23952	0.26960620284080505	0.004826830234378576	-0.026337508112192154	0.13269533216953278	0.002269878750666976	0.007651121821254492	-0.05165131762623787	0.0013466804521158338	0.07699141651391983	-0.12215488404035568	-0.001886723912321031	0.07327049970626831	-0.14526686072349548	-0.0011597491102293134	0.03858740255236626	0.13235147297382355	-0.010786828584969044	0.006230268161743879	0.13399849832057953	0.01625431887805462	0.004740990698337555	-0.016575807705521584	-0.04750915616750717	0.04649798944592476	-0.023574169725179672	0.052480269223451614	0.04219674691557884	-0.14742812514305115	-0.03138715773820877	0.055910997092723846	-0.14869114756584167	0.02727384679019451	0.05545709282159805	0.24668455123901367	-0.015598475001752377	-0.027995403856039047	0.22481392323970795	-0.013723106123507023	-0.025691600516438484	0.07084039598703384	-0.04975990578532219	0.01728181727230549	0.025400886312127113	-0.07098834961652756	0.016175031661987305	-0.02070445567369461	-0.04147643595933914	0.008183126337826252	-0.03678404167294502
Dasypus nov 23948	0.26287469267845154	0.007528121117502451	-0.01758180372416973	0.1388617753982544	0.003634803695604205	0.013349524699151516	-0.038669463247060776	0.0019923022482544184	0.08548854291439056	-0.1291649043560028	0.0010119632352143526	0.08476749807596207	-0.16264106333255768	-0.0020138428080826998	0.04958125203847885	0.1341816633939743	-0.010409903712570667	0.011894825845956802	0.13418729603290558	0.01752716489136219	0.012161930091679096	-0.008289361372590065	-0.05490259453654289	0.04933488741517067	-0.011806873604655266	0.05983894318342209	0.04852505400776863	-0.15139412879943848	-0.03403542563319206	0.06596925854682922	-0.15387512743473053	0.032975539565086365	0.06520362198352814	0.2362642139196396	-0.01527013722807169	-0.027475006878376007	0.21725940704345703	-0.010825026780366898	-0.01899040676653385	0.061437129974365234	-0.05784178152680397	0.019598297774791718	0.029882661998271942	-0.0738452821969986	0.014652120880782604	-0.012905679643154144	-0.04675494506955147	0.0031931886915117502	-0.032365795224905014
Dasypus nov 18024	0.2664436101913452	0.005856435280293226	-0.02002706192433834	0.13588659465312958	0.0042981356382369995	0.012989500537514687	-0.045751817524433136	0.0013193318154662848	0.08136157691478729	-0.1226373016834259	-5.565288010984659E-4	0.07880691438913345	-0.14594192802906036	-1.6383151523768902E-4	0.04295388609170914	0.1332036852836609	-0.009391444735229015	0.011265804059803486	0.1332630217075348	0.020888568833470345	0.009273900650441647	-0.026042234152555466	-0.05011681094765663	0.040708065032958984	-0.028777817264199257	0.05205017700791359	0.04174194857478142	-0.14809134602546692	-0.02969139628112316	0.06353724747896194	-0.14732912182807922	0.027464762330055237	0.06486799567937851	0.24535293877124786	-0.014115540310740471	-0.021602993831038475	0.22197958827018738	-0.012925427407026291	-0.016936156898736954	0.0678752213716507	-0.05460697039961815	0.018562523648142815	0.021409375593066216	-0.07685345411300659	0.018447721377015114	-0.016613567247986794	-0.041677508503198624	0.006349723320454359	-0.031827788800001144
Dasypus nov 20958	0.2659968435764313	0.00539783900603652	-0.021673277020454407	0.1250692903995514	0.0034122029319405556	0.0169682577252388	-0.0475345216691494	0.0010479380143806338	0.07900340855121613	-0.1193925216794014	-0.0013215895742177963	0.07840535789728165	-0.14768770337104797	-0.0015679969219490886	0.03459886088967323	0.13173560798168182	-0.010103050619363785	0.011701460927724838	0.1301124393939972	0.019215930253267288	0.010838466696441174	-0.028432637453079224	-0.05079878866672516	0.04440436139702797	-0.03232130780816078	0.0542307123541832	0.04158915579319	-0.14874108135700226	-0.0310654416680336	0.06296300143003464	-0.1490693986415863	0.02942941151559353	0.06252405792474747	0.24614931643009186	-0.015627257525920868	-0.0257527157664299	0.2276802361011505	-0.014163890853524208	-0.02262970618903637	0.07252917438745499	-0.04916275292634964	0.014811305329203606	0.02703521028161049	-0.07307572662830353	0.01636054739356041	-0.019588926807045937	-0.04280819743871689	0.006212477572262287	-0.03407865762710571
Dasypus nov 8538	0.2676140069961548	0.004997462034225464	-0.026473751291632652	0.13329777121543884	0.0037003555335104465	0.015224063768982887	-0.049718260765075684	6.84536003973335E-4	0.07977990061044693	-0.11965566128492355	-0.0012919261353090405	0.07958009839057922	-0.14566300809383392	-0.0028122924268245697	0.05099760740995407	0.12996943295001984	-0.011091570369899273	0.012986680492758751	0.13008852303028107	0.020740803331136703	0.012052388861775398	-0.022601298987865448	-0.04530061036348343	0.04851590469479561	-0.027312062680721283	0.04969209060072899	0.040775615721940994	-0.14513717591762543	-0.027379050850868225	0.06378845870494843	-0.14731091260910034	0.02239621803164482	0.0656200647354126	0.2468930333852768	-0.014412732794880867	-0.027801115065813065	0.22531189024448395	-0.01446117926388979	-0.02402551844716072	0.07024415582418442	-0.04554731026291847	0.02492460049688816	0.024978213012218475	-0.07049296051263809	0.014636988751590252	-0.01589120924472809	-0.04069487750530243	0.0016161756357178092	-0.030164385214447975
Dasypus nov 29160	0.2660267651081085	0.00901023019105196	-0.03201945498585701	0.1271042823791504	0.0035471294540911913	0.016483472660183907	-0.05393977090716362	6.080312887206674E-4	0.07927995175123215	-0.11900842189788818	-6.810883496655151E-5	0.07510696351528168	-0.1479935646057129	5.216007120907307E-4	0.03735746443271637	0.1244281679391861	-0.009586767293512821	0.016605746001005173	0.12772363424301147	0.01619257591664791	0.014409911818802357	-0.02824280969798565	-0.051816053688526154	0.0387890450656414	-0.028531590476632118	0.05373042821884155	0.04710104689002037	-0.14049090445041656	-0.02370317280292511	0.06195399910211563	-0.14075592160224915	0.031611278653144836	0.06167742609977722	0.24574550986289978	-0.011375871486961842	-0.0350288562476635	0.22667159140110016	-0.011989999562501907	-0.030932603403925896	0.06894531846046448	-0.05251435562968254	0.024879002943634987	0.020413637161254883	-0.07440081983804703	0.012092215940356255	-0.016859248280525208	-0.04762499779462814	0.006444137077778578	-0.03620200976729393
Dasypus nov 15762	0.2586093246936798	0.006631814409047365	-0.02265855111181736	0.12860164046287537	0.006000164430588484	0.010312175378203392	-0.05037837475538254	0.003908439073711634	0.08088239282369614	-0.12295465171337128	-0.0011616097763180733	0.07624661922454834	-0.15250787138938904	-7.713782251812518E-4	0.04830459877848625	0.12579399347305298	-0.0077761211432516575	0.0101470360532403	0.12564413249492645	0.01677871122956276	0.009858750738203526	-0.02666846103966236	-0.05130547285079956	0.04161661118268967	-0.029274769127368927	0.05393480136990547	0.044081054627895355	-0.14973513782024384	-0.030383801087737083	0.05942168086767197	-0.15276630222797394	0.026188213378190994	0.058998093008995056	0.2516360282897949	-0.013622640632092953	-0.03127241134643555	0.2273293286561966	-0.013860355131328106	-0.02852950617671013	0.06384702026844025	-0.056206535547971725	0.023381773382425308	0.025081517174839973	-0.07398591935634613	0.022174349054694176	-0.017465565353631973	-0.04282911866903305	0.0024472950026392937	-0.032102372497320175
Dasypus nov 3244	0.25071805715560913	0.006209041923284531	-0.022589365020394325	0.13245035707950592	0.004151743371039629	0.0177866593003273	-0.04676007851958275	0.0015086770290508866	0.08962361514568329	-0.1249401867389679	8.106090826913714E-4	0.08521656692028046	-0.16378775238990784	-0.0011950344778597355	0.05875470116734505	0.12735654413700104	-0.011391954496502876	0.013773451559245586	0.12920160591602325	0.019937116652727127	0.013518469408154488	-0.0044495053589344025	-0.061424512416124344	0.049610499292612076	-0.0073646740056574345	0.06511793285608292	0.04878950119018555	-0.1504971832036972	-0.03238162770867348	0.06731842458248138	-0.15165264904499054	0.03496469929814339	0.06780112534761429	0.2272559404373169	-0.016535330563783646	-0.02796786278486252	0.207579106092453	-0.01571839489042759	-0.02145860530436039	0.0713815987110138	-0.05641326308250427	0.028195252642035484	0.027339620515704155	-0.07931127399206161	0.014765630476176739	-0.009231858886778355	-0.05231966823339462	0.001570979948155582	-0.030398890376091003
Dasypus nov 31174	0.26505452394485474	0.004454825539141893	-0.029124828055500984	0.13171111047267914	0.004129435401409864	0.013783898204565048	-0.05069649592041969	0.0017615982796996832	0.08056075870990753	-0.1220473125576973	-5.053522763773799E-4	0.07651086151599884	-0.15258033573627472	-0.0021970709785819054	0.03450366482138634	0.13576801121234894	-0.006629087962210178	0.010606206953525543	0.13498054444789886	0.01571458950638771	0.010050805285573006	-0.026057502254843712	-0.049700234085321426	0.04893450811505318	-0.027224712073802948	0.05262702703475952	0.04533233121037483	-0.1460595577955246	-0.02716403640806675	0.06225218623876572	-0.14606045186519623	0.025003675371408463	0.0627996027469635	0.24719074368476868	-0.01294818613678217	-0.031905051320791245	0.22486597299575806	-0.013944231905043125	-0.02746746875345707	0.0708426907658577	-0.04707925394177437	0.02864321880042553	0.02626892551779747	-0.07154872268438339	0.017770402133464813	-0.016764024272561073	-0.0425691232085228	0.005725044757127762	-0.03579165041446686
Dasypus nov 28347	0.2641456723213196	0.005928151309490204	-0.029143841937184334	0.13361281156539917	0.0051657636649906635	0.013305053114891052	-0.04638651758432388	2.996626135427505E-4	0.0815640464425087	-0.12883736193180084	1.2075055565219373E-4	0.07778789848089218	-0.16311639547348022	-0.0021303328685462475	0.04077758267521858	0.1346191167831421	-0.009013774804770947	0.00985789205878973	0.13609494268894196	0.016318684443831444	0.008711844682693481	-0.0054726367816329	-0.05284333974123001	0.04672986641526222	-0.00878595095127821	0.0561145544052124	0.04558262601494789	-0.14774921536445618	-0.03445284068584442	0.06316398829221725	-0.14702384173870087	0.03033187985420227	0.06464973837137222	0.24216027557849884	-0.012582110241055489	-0.030397288501262665	0.22158271074295044	-0.011692110449075699	-0.026048634201288223	0.0591859444975853	-0.0607309527695179	0.02029322274029255	0.021763592958450317	-0.07417043298482895	0.02232571691274643	-0.01588335819542408	-0.045649830251932144	-5.334248999133706E-4	-0.02969108335673809
Dasypus nov 7157	0.25934556126594543	0.006877821404486895	-0.02959313616156578	0.118992879986763	0.004059589467942715	0.025977449491620064	-0.054089561104774475	-4.726806655526161E-4	0.07536796480417252	-0.1267501711845398	9.64303791988641E-4	0.07553592324256897	-0.14700950682163239	-7.687016623094678E-4	0.042709171772003174	0.12461968511343002	-0.011677469126880169	0.018813684582710266	0.12393955141305923	0.01906636916100979	0.01870066486299038	-0.02462724968791008	-0.049542371183633804	0.044451721012592316	-0.03018542379140854	0.04904827103018761	0.045879852026700974	-0.15209324657917023	-0.025711653754115105	0.05832621455192566	-0.15276016294956207	0.025552762672305107	0.05845826119184494	0.24238255620002747	-0.014818696305155754	-0.035448383539915085	0.22708208858966827	-0.015367534011602402	-0.03208283334970474	0.07456260174512863	-0.04837575554847717	0.026512255892157555	0.03130147606134415	-0.07268480956554413	0.021130463108420372	-0.0167109202593565	-0.04294152185320854	0.00689085153862834	-0.03269146755337715
Dasypus nov 12306	0.26597052812576294	0.007464133203029633	-0.01610846072435379	0.135114848613739	0.002992267021909356	0.013064156286418438	-0.04863862320780754	0.0021678570192307234	0.0755409225821495	-0.1229870542883873	0.0013073224108666182	0.0748070478439331	-0.15176083147525787	-0.0021151122637093067	0.04681377112865448	0.13271909952163696	-0.009355181828141212	0.011562425643205643	0.13055868446826935	0.018184352666139603	0.011603116057813168	-0.008510029874742031	-0.046427879482507706	0.04436638206243515	-0.015486761927604675	0.04911499097943306	0.04197273403406143	-0.15233907103538513	-0.029551325365900993	0.052947428077459335	-0.1535547822713852	0.023345280438661575	0.05602530017495155	0.24481478333473206	-0.01236699614673853	-0.023502007126808167	0.2338179349899292	-0.0124749056994915	-0.02054123394191265	0.07328412681818008	-0.05165626481175423	0.013382939621806145	0.027903566136956215	-0.07163464277982712	0.013662584125995636	-0.01245820987969637	-0.04060833528637886	0.005474247504025698	-0.02924693562090397
Dasypus nov 31175	0.27008989453315735	0.0064814151264727116	-0.027208145707845688	0.13333134353160858	0.0030287483241409063	0.012920369394123554	-0.04931522160768509	0.002247468801215291	0.07845918834209442	-0.12018847465515137	2.6084674755111337E-4	0.07523541152477264	-0.1477142870426178	-0.0016893316060304642	0.04353850707411766	0.1318504959344864	-0.007632229942828417	0.011315702460706234	0.13059930503368378	0.017095040529966354	0.01145387627184391	-0.02055983804166317	-0.05371376872062683	0.0373525470495224	-0.02408399060368538	0.055485665798187256	0.03938021883368492	-0.14413121342658997	-0.025952927768230438	0.06221260130405426	-0.14228256046772003	0.02592518925666809	0.0647955909371376	0.24986959993839264	-0.01408458687365055	-0.02921011857688427	0.2334282547235489	-0.014162694104015827	-0.0269670058041811	0.07014652341604233	-0.050278227776288986	0.0235082246363163	0.02079106494784355	-0.07171356678009033	0.013921980746090412	-0.019223490729928017	-0.04299463331699371	0.004042675718665123	-0.03736463189125061
Dasypus nov 29187	0.26568707823753357	0.004702833481132984	-0.03336767852306366	0.1282663196325302	0.002147018676623702	0.01718541793525219	-0.05269642546772957	0.002529493300244212	0.08315728604793549	-0.11755609512329102	4.434450529515743E-4	0.07700283825397491	-0.1563706248998642	-6.551884580403566E-4	0.035510674118995667	0.129586324095726	-0.010904124937951565	0.013525838032364845	0.12852002680301666	0.01649119332432747	0.013769829645752907	-0.023164547979831696	-0.05486365035176277	0.04798031225800514	-0.03409130871295929	0.056783851236104965	0.051177527755498886	-0.1444789171218872	-0.030651042237877846	0.060773447155952454	-0.14550739526748657	0.029311565682291985	0.06187053769826889	0.24584156274795532	-0.015711819753050804	-0.03304872289299965	0.22873175144195557	-0.01635867729783058	-0.028407391160726547	0.06097540259361267	-0.05848168954253197	0.02469494566321373	0.020773157477378845	-0.0760812982916832	0.015628110617399216	-0.01885673776268959	-0.044789236038923264	0.0076799774542450905	0.017149608582258224
Dasypus nov 15920	0.26278549432754517	0.010237826965749264	-0.027672892436385155	0.14170311391353607	0.004494392778724432	0.010504958219826221	-0.044057697057724	-8.196911949198693E-5	0.07899796962738037	-0.12335659563541412	-3.0519822030328214E-4	0.07615873962640762	-0.15837521851062775	-8.526536985300481E-4	0.04581595957279205	0.13773684203624725	-0.00606355769559741	0.009815978817641735	0.13730184733867645	0.014880266040563583	0.009603193029761314	-0.014845114201307297	-0.05152653902769089	0.039894696325063705	-0.018672240898013115	0.05582747235894203	0.040733180940151215	-0.1467539519071579	-0.029134472832083702	0.059847764670848846	-0.1470460742712021	0.029370039701461792	0.060468629002571106	0.24246855080127716	-0.010654952377080917	-0.02922550030052662	0.23181669414043427	-0.01073545590043068	-0.026944955810904503	0.06298528611660004	-0.05244658142328262	0.020925886929035187	0.020391324535012245	-0.07147746533155441	0.013598556630313396	-0.015466972254216671	-0.04330951347947121	0.0025897356681525707	-0.03333641216158867
Dasypus nov 281290	0.26134243607521057	0.007726207375526428	-0.02576454170048237	0.13996650278568268	0.00325041264295578	0.008182156831026077	-0.056793488562107086	0.002509110374376178	0.0805923268198967	-0.13126130402088165	-8.514102082699537E-4	0.0767173022031784	-0.1570625603199005	-3.3450659248046577E-4	0.04171063005924225	0.12815183401107788	-0.010634944774210453	0.008947605267167091	0.12730883061885834	0.01871831901371479	0.0077791172079741955	-0.0195915624499321	-0.051548827439546585	0.04572732001543045	-0.023790910840034485	0.05394690856337547	0.045174069702625275	-0.15603134036064148	-0.02674219384789467	0.056777045130729675	-0.1566951721906662	0.022833550348877907	0.05732640251517296	0.2393210381269455	-0.01561974361538887	-0.029609201475977898	0.22795432806015015	-0.015094723552465439	-0.029581772163510323	0.062145546078681946	-0.05868420749902725	0.015271150507032871	0.028852494433522224	-0.07648127526044846	0.019532790407538414	-0.015967542305588722	-0.04190756753087044	0.007309419568628073	-0.03351593762636185
Dasypus nov A22839	0.2684970200061798	0.007080053444951773	-0.031677573919296265	0.1347314566373825	0.003844653721898794	0.010682739317417145	-0.0523066446185112	7.742982124909759E-4	0.0779324620962143	-0.12091387808322906	0.002995728515088558	0.07715550810098648	-0.1590396910905838	-1.5488156350329518E-4	0.03971068561077118	0.13156668841838837	-0.008638949133455753	0.01166533213108778	0.13040676712989807	0.015390909276902676	0.011244111694395542	-0.02661978267133236	-0.047871172428131104	0.044675957411527634	-0.02622068300843239	0.04847051948308945	0.04489080607891083	-0.15075857937335968	-0.029300982132554054	0.058442700654268265	-0.1500977724790573	0.028346145525574684	0.059444610029459	0.24551786482334137	-0.010311823338270187	-0.030957050621509552	0.22910071909427643	-0.011437338776886463	-0.02880936488509178	0.06835553050041199	-0.044283755123615265	0.020735619589686394	0.03256915509700775	-0.06897570192813873	0.01214625034481287	-0.018559962511062622	-0.04200848191976547	0.004764225333929062	-0.03770110383629799
Dasypus nov 283467	0.2635399401187897	0.005877141375094652	-0.022525953128933907	0.13796886801719666	0.004091446753591299	0.008650125004351139	-0.04977821558713913	0.002612282056361437	0.07625126093626022	-0.12520192563533783	-0.0017458584625273943	0.07888670265674591	-0.14915388822555542	-2.395997871644795E-4	0.041268859058618546	0.13132408261299133	-0.011249621398746967	0.009034245274960995	0.1319863349199295	0.019168192520737648	0.0074242353439331055	-0.013787730596959591	-0.046592868864536285	0.04246162250638008	-0.01323532871901989	0.04985879734158516	0.03463553264737129	-0.1541997790336609	-0.02862796001136303	0.06460337340831757	-0.15489177405834198	0.025338061153888702	0.065027616918087	0.24160252511501312	-0.013155545108020306	-0.025262076407670975	0.22857533395290375	-0.013293419033288956	-0.020802844315767288	0.06948275864124298	-0.05077396333217621	0.01575521007180214	0.02687918208539486	-0.07121287286281586	0.012019716203212738	-0.01587986759841442	-0.039885859936475754	0.004410208202898502	-0.030277248471975327
Dasypus nov 347565	0.2601253092288971	0.00871718768030405	-0.021481165662407875	0.13221974670886993	0.0020138544496148825	0.016575196757912636	-0.04852050915360451	0.001451748888939619	0.08164707571268082	-0.11162102222442627	-0.0012953606201335788	0.08340934664011002	-0.15332800149917603	-0.0014041576068848372	0.05188330262899399	0.13444876670837402	-0.011099680326879025	0.013014372438192368	0.1339937299489975	0.01590750552713871	0.01365336962044239	-0.017261765897274017	-0.05708060786128044	0.04564419761300087	-0.020036833360791206	0.06226741150021553	0.047030769288539886	-0.13888822495937347	-0.031137561425566673	0.06967926025390625	-0.1401929408311844	0.028794510290026665	0.06918445229530334	0.23788511753082275	-0.01581277884542942	-0.024498350918293	0.2202080339193344	-0.016192613169550896	-0.02162742055952549	0.06859596818685532	-0.055282287299633026	0.02547983080148697	0.026122111827135086	-0.07658121734857559	0.01116347499191761	-0.01682593673467636	-0.049797359853982925	-0.0011227934155613184	-0.03591127321124077
Dasypus nov 339669	0.26867246627807617	0.0055893342941999435	-0.02079385332763195	0.12484937161207199	0.0036239568144083023	0.013540683314204216	-0.04013188183307648	9.373073116876185E-4	0.0853307768702507	-0.12210144847631454	-1.549168664496392E-4	0.08084756880998611	-0.14928558468818665	-0.0012513709953054786	0.055293262004852295	0.1309211403131485	-0.004974768962711096	0.011100671254098415	0.13143746554851532	0.014736438170075417	0.009998775087296963	-0.022816624492406845	-0.05172433331608772	0.04442499577999115	-0.023583251982927322	0.05536461994051933	0.04346470907330513	-0.14732691645622253	-0.02677764557301998	0.06817357242107391	-0.1463770866394043	0.02453843131661415	0.06927869468927383	0.2488299459218979	-0.013507344760000706	-0.02280459925532341	0.22560042142868042	-0.013064981438219547	-0.02102384716272354	0.06497129797935486	-0.050569649785757065	0.0231216698884964	0.021467726677656174	-0.07005361467599869	0.01798805221915245	-0.018543638288974762	-0.04427596926689148	0.004168044310063124	-0.03264465183019638
Dasypus nov 565067	0.270673006772995	0.007419421803206205	-0.031314343214035034	0.13630522787570953	0.0033834530040621758	0.014100178144872189	-0.047448620200157166	8.62335495185107E-4	0.07408659160137177	-0.12012800574302673	-2.3938446247484535E-4	0.07110317051410675	-0.15048594772815704	-0.002104538958519697	0.03931347280740738	0.13216018676757812	-0.011556836776435375	0.01376384124159813	0.13064542412757874	0.017146632075309753	0.013995780609548092	-0.02359943278133869	-0.04575777053833008	0.03842698410153389	-0.02671624906361103	0.04880455881357193	0.0439973846077919	-0.1478228121995926	-0.027481675148010254	0.05996156483888626	-0.14785155653953552	0.02439340017735958	0.061764150857925415	0.2472841739654541	-0.015635930001735687	-0.033277444541454315	0.2292328178882599	-0.01395112369209528	-0.027671627700328827	0.06821531057357788	-0.05212035030126572	0.024106230586767197	0.030756792053580284	-0.0707368478178978	0.013164558447897434	-0.017449282109737396	-0.039966799318790436	0.0059820846654474735	-0.03175381198525429
Dasypus nov 568206	0.26949381828308105	0.009778231382369995	-0.025458713993430138	0.12957096099853516	0.003760986728593707	0.017493961378932	-0.05067169666290283	9.92384972050786E-4	0.07463505864143372	-0.11625239253044128	0.00213791080750525	0.07916813343763351	-0.14963431656360626	-0.0013152513420209289	0.03460674732923508	0.13178478181362152	-0.007439759094268084	0.015078078955411911	0.1301017552614212	0.016006944701075554	0.014551184140145779	-0.030104149132966995	-0.05136381834745407	0.040960803627967834	-0.035497408360242844	0.050897639244794846	0.044046781957149506	-0.14461173117160797	-0.025800496339797974	0.06583680957555771	-0.14304161071777344	0.027176938951015472	0.06556962430477142	0.24923594295978546	-0.013216208666563034	-0.027527060359716415	0.23027458786964417	-0.013632873073220253	-0.02540828101336956	0.06681176275014877	-0.05130133405327797	0.027673782780766487	0.025913404300808907	-0.07617001235485077	0.011739452369511127	-0.02066616714000702	-0.042908571660518646	7.704618037678301E-4	-0.03908683359622955
Dasypus nov 33867	0.2652645409107208	0.008282049559056759	-0.025663413107395172	0.12770996987819672	0.004452470224350691	0.019881004467606544	-0.04840926080942154	0.0033128010109066963	0.07605704665184021	-0.11948554217815399	3.6915746750310063E-4	0.08112429082393646	-0.15044482052326202	-9.469405049458146E-4	0.0387406162917614	0.1273835301399231	-0.011254757642745972	0.017230942845344543	0.13053160905838013	0.019268915057182312	0.014915877021849155	-0.03334452956914902	-0.05033012479543686	0.04005909711122513	-0.03168044984340668	0.05318475887179375	0.035139646381139755	-0.13950207829475403	-0.02513071335852146	0.06961563974618912	-0.14109086990356445	0.025391431525349617	0.07057619094848633	0.24622754752635956	-0.012373355217278004	-0.027931643649935722	0.22435830533504486	-0.014521082863211632	-0.026272203773260117	0.07464265078306198	-0.050256937742233276	0.026271389797329903	0.024603446945548058	-0.07520969957113266	0.018398694694042206	-0.0190652534365654	-0.04440556839108467	0.0024607093073427677	-0.035203270614147186
Dasypus nov 20920	0.25738197565078735	0.003002418205142021	-0.025439823046326637	0.14032478630542755	0.004022201988846064	0.013540283776819706	-0.05362978205084801	-1.3836186553817242E-4	0.09043718874454498	-0.12456473708152771	-0.002827086253091693	0.07893285155296326	-0.1610286980867386	-0.0023115917574614286	0.046171076595783234	0.1344185173511505	-0.00747409975156188	0.010634706355631351	0.1330786496400833	0.015753744170069695	0.010164798237383366	-0.008682135492563248	-0.055886805057525635	0.049927935004234314	-0.011676729656755924	0.059701692312955856	0.051772769540548325	-0.14398877322673798	-0.03198973461985588	0.06452841311693192	-0.14729666709899902	0.030022747814655304	0.06321024894714355	0.23468728363513947	-0.0170397087931633	-0.02590016834437847	0.2162211686372757	-0.015357478521764278	-0.020960446447134018	0.06084635108709335	-0.05994294956326485	0.020373249426484108	0.026222234591841698	-0.07465065270662308	0.015556544996798038	-0.011951230466365814	-0.04852217435836792	0.002731368178501725	-0.030288206413388252
Dasypus nov 179172	0.26119816303253174	0.005491156131029129	-0.027546554803848267	0.14095930755138397	0.004071115981787443	0.01129161287099123	-0.050599295645952225	3.010242071468383E-4	0.07981440424919128	-0.11627928912639618	2.8436409775167704E-4	0.07751953601837158	-0.14983917772769928	3.9907320751808584E-4	0.04727630317211151	0.13689814507961273	-0.007137556094676256	0.012748953886330128	0.13605915009975433	0.016203787177801132	0.01052071899175644	-0.014275242574512959	-0.052254460752010345	0.04805108532309532	-0.01385562215000391	0.05630164220929146	0.045954518020153046	-0.14275598526000977	-0.03341521695256233	0.0635729655623436	-0.1426219493150711	0.028645364567637444	0.06527065485715866	0.24102678894996643	-0.014796072617173195	-0.028041256591677666	0.22290809452533722	-0.013188891112804413	-0.024515198543667793	0.06404108554124832	-0.05755343660712242	0.021789150312542915	0.02522805891931057	-0.0735078677535057	0.017861148342490196	-0.015320411883294582	-0.045638252049684525	2.4909849162213504E-4	-0.03140624612569809
Dasypus nov 244903	0.26215365529060364	0.006180471740663052	-0.024580536410212517	0.1452614814043045	0.004737936891615391	0.009713775478303432	-0.04535183310508728	5.585572798736393E-4	0.07334336638450623	-0.11252282559871674	-5.217102443566546E-5	0.07530498504638672	-0.14671576023101807	-0.001117492443881929	0.03980078548192978	0.13960956037044525	-0.0062139155343174934	0.009666897356510162	0.1399109959602356	0.014671772718429565	0.009939444251358509	-0.025087852030992508	-0.05071975290775299	0.0412568636238575	-0.027392849326133728	0.05178123712539673	0.04032311215996742	-0.14205147325992584	-0.024699201807379723	0.06510886549949646	-0.1426565796136856	0.024863703176379204	0.06388399004936218	0.24311254918575287	-0.013200315646827221	-0.0281356330960989	0.22553689777851105	-0.014630495570600033	-0.026559945195913315	0.06808146089315414	-0.04917072132229805	0.025575194507837296	0.026867730543017387	-0.0733276978135109	0.016024010255932808	-0.020624501630663872	-0.04227674379944801	0.003444529138505459	-0.03871236741542816
Dasypus nov 406700	0.2631562054157257	0.006218391470611095	-0.019232822582125664	0.1391139030456543	0.003367822850123048	0.010473310016095638	-0.05063018575310707	0.0034165531396865845	0.07835924625396729	-0.1200508251786232	8.771160501055419E-4	0.07984671741724014	-0.1479741632938385	-9.322822443209589E-4	0.04770607501268387	0.13585440814495087	-0.00952146202325821	0.00714626582339406	0.1379021406173706	0.018618183210492134	0.007635403424501419	-0.013813559897243977	-0.049738965928554535	0.040469925850629807	-0.01595454476773739	0.05367802083492279	0.041722267866134644	-0.14609336853027344	-0.025400063022971153	0.06812369078397751	-0.14627371728420258	0.026756133884191513	0.06621885299682617	0.2430790811777115	-0.012584141455590725	-0.022384466603398323	0.22658362984657288	-0.01333528757095337	-0.02207450196146965	0.06442300230264664	-0.05885414779186249	0.01953355222940445	0.030069759115576744	-0.07277143746614456	0.01174443494528532	-0.015827398747205734	-0.043513935059309006	0.005543113686144352	-0.03221502527594566
Dasypus nov 337563	0.2671401798725128	0.008144613355398178	-0.02573692798614502	0.12613047659397125	0.004057331942021847	0.017587723210453987	-0.04514191672205925	0.0025531568098813295	0.07367104291915894	-0.11668307334184647	0.0016714921221137047	0.07860034704208374	-0.14777116477489471	-1.159146340796724E-4	0.03774034604430199	0.12571121752262115	-0.008069121278822422	0.01705935224890709	0.1261499971151352	0.017137886956334114	0.015530847944319248	-0.018299469724297523	-0.046815481036901474	0.0415421798825264	-0.026666251942515373	0.04687264561653137	0.04624021798372269	-0.14191055297851562	-0.029614431783556938	0.06415112316608429	-0.14237840473651886	0.028058385476469994	0.06510370969772339	0.24597151577472687	-0.015134185552597046	-0.02806708589196205	0.22750769555568695	-0.014516472816467285	-0.0245183277875185	0.07207994163036346	-0.05183188617229462	0.01850827969610691	0.029802484437823296	-0.07166169583797455	0.011181379668414593	-0.01801406964659691	-0.04140337556600571	0.002596046542748809	-0.030544329434633255
Dasypus nov 32868	0.27043235301971436	0.006132818758487701	-0.022723743692040443	0.13680389523506165	0.0036971792578697205	0.010450663045048714	-0.04818582534790039	2.5369058130308986E-4	0.08433858305215836	-0.12211038172245026	-4.647882888093591E-4	0.07861381024122238	-0.1456754207611084	-2.875395293813199E-4	0.04424196854233742	0.1368919461965561	-0.00792069360613823	0.009720057249069214	0.13454973697662354	0.017522728070616722	0.009321652352809906	-0.030968457460403442	-0.055093005299568176	0.0370195209980011	-0.03159218281507492	0.057305335998535156	0.03653331100940704	-0.14875030517578125	-0.029247218742966652	0.0631297379732132	-0.14900976419448853	0.027967631816864014	0.062032416462898254	0.24756427109241486	-0.013572541996836662	-0.02616286836564541	0.2305108606815338	-0.014416398480534554	-0.023996081203222275	0.06964988261461258	-0.05332166701555252	0.02103196643292904	0.021303310990333557	-0.07252845913171768	0.014149398542940617	-0.019359959289431572	-0.04251338168978691	0.005365508142858744	-0.03445366397500038
Dasypus nov 31693	0.26724550127983093	0.007104560732841492	-0.024410590529441833	0.13110817968845367	0.0033508276101201773	0.011368590407073498	-0.042062729597091675	-4.6338068204931915E-4	0.07956728339195251	-0.12427692115306854	-9.610545239411294E-4	0.07064829021692276	-0.14764046669006348	-0.001520437770523131	0.035708144307136536	0.12751413881778717	-0.010596068575978279	0.011961531825363636	0.12993821501731873	0.017618056386709213	0.009947707876563072	-0.029854662716388702	-0.053266528993844986	0.036759503185749054	-0.028401941061019897	0.055256541818380356	0.03804880753159523	-0.15112456679344177	-0.02931954339146614	0.05658403038978577	-0.15249678492546082	0.028734905645251274	0.05703708529472351	0.24216251075267792	-0.01320918370038271	-0.03015330247581005	0.22948376834392548	-0.013515259139239788	-0.028695786371827126	0.06934870034456253	-0.053891707211732864	0.0225477684289217	0.02594742923974991	-0.07304731011390686	0.014961736276745796	-0.01719239167869091	-0.04447006806731224	0.008858340792357922	-0.03742779791355133
Dasypus nov 32275	0.2682288587093353	0.006009043660014868	-0.025049589574337006	0.12176153808832169	0.0031196787022054195	0.015669116750359535	-0.04388696327805519	6.884668255224824E-5	0.0764157697558403	-0.12202725559473038	-0.0013433924177661538	0.0764085054397583	-0.1515217274427414	2.963975421153009E-4	0.04401833564043045	0.123612180352211	-0.010856916196644306	0.011883724480867386	0.118772491812706	0.01725725829601288	0.014719332568347454	-0.024893073365092278	-0.05010048672556877	0.03844994306564331	-0.028972167521715164	0.05246392637491226	0.036313023418188095	-0.14811797440052032	-0.026847444474697113	0.06583436578512192	-0.14991705119609833	0.024679770693182945	0.06584867089986801	0.25089436769485474	-0.011766813695430756	-0.026399511843919754	0.23297350108623505	-0.012436636723577976	-0.023876672610640526	0.06351737678050995	-0.05452017858624458	0.02011837065219879	0.02396038919687271	-0.07260099798440933	0.015496884472668171	-0.015634864568710327	-0.04489713907241821	0.006956711411476135	-0.03397776558995247
Dasypus nov 32261	0.2704872488975525	0.005962904077023268	-0.028307372704148293	0.13263477385044098	0.003830217057839036	0.014820496551692486	-0.05347926914691925	0.003299735952168703	0.07591873407363892	-0.12133076041936874	-5.399165092967451E-4	0.07474087923765182	-0.14907290041446686	-0.0023169044870883226	0.041130904108285904	0.1352594494819641	-0.010598021559417248	0.009836560115218163	0.1357160359621048	0.018415765836834908	0.009235955774784088	-0.025268355384469032	-0.049942392855882645	0.04470418766140938	-0.0267507154494524	0.0518508180975914	0.04469216987490654	-0.15053309500217438	-0.025928806513547897	0.05940788984298706	-0.14985105395317078	0.024096889421343803	0.06006111577153206	0.2519802153110504	-0.014010326936841011	-0.029594309628009796	0.22775119543075562	-0.012666553258895874	-0.026346320286393166	0.06830652058124542	-0.050864171236753464	0.016810251399874687	0.028451986610889435	-0.07280580699443817	0.01214602217078209	-0.016391072422266006	-0.042449891567230225	0.011451796628534794	-0.03281572088599205
Dasypus nov 31996	0.2703808844089508	0.004085935186594725	-0.027234090492129326	0.1363411247730255	0.003214864060282707	0.008336850441992283	-0.05373316630721092	0.001959450077265501	0.0821605771780014	-0.12728869915008545	-8.456993964500725E-4	0.07428336143493652	-0.14991840720176697	-0.0026490692980587482	0.03815745189785957	0.13416002690792084	-0.010114537551999092	0.007176695857197046	0.13729682564735413	0.014764389954507351	0.006173267494887114	-0.0290022362023592	-0.04971519112586975	0.04087880253791809	-0.03633757308125496	0.051123421639204025	0.046366795897483826	-0.15252362191677094	-0.026660609990358353	0.05773277208209038	-0.1550672948360443	0.02538321539759636	0.05599884316325188	0.2500259578227997	-0.014139081351459026	-0.029606997966766357	0.23425635695457458	-0.014119877479970455	-0.027276478707790375	0.06229696422815323	-0.05077508091926575	0.024334818124771118	0.019246000796556473	-0.07196752727031708	0.01865292154252529	-0.01881590113043785	-0.04074809327721596	0.007659300230443478	-0.026660047471523285
Dasypus nov 1-2-1-34	0.2655763328075409	0.006152897607535124	-0.01568571664392948	0.131064772605896	0.004136908333748579	0.013763537630438805	-0.04094802588224411	0.0018445041496306658	0.0790289044380188	-0.11356288194656372	-0.0015621376223862171	0.08378452062606812	-0.15235230326652527	4.6865115291438997E-4	0.04787220433354378	0.12727658450603485	-0.005676237866282463	0.013846269808709621	0.12883085012435913	0.013538884930312634	0.01353040523827076	-0.012599457055330276	-0.04655052348971367	0.03985075280070305	-0.018693936988711357	0.048629242926836014	0.03997981920838356	-0.14716829359531403	-0.031228626146912575	0.0704319179058075	-0.14926856756210327	0.027445113286376	0.07040932774543762	0.24438555538654327	-0.012827148661017418	-0.020320214331150055	0.2255818098783493	-0.012660626322031021	-0.017847415059804916	0.07038219273090363	-0.049412164837121964	0.016490256413817406	0.027154335752129555	-0.07049456238746643	0.010223209857940674	-0.0158047117292881	-0.0395093709230423	-0.0022581960074603558	-0.030846871435642242
Dasypus nov 3-7-7-150	0.2649487853050232	0.006072226911783218	-0.023511720821261406	0.13117124140262604	0.005759035237133503	0.012908248230814934	-0.04619969055056572	0.003063019597902894	0.08136504143476486	-0.13030466437339783	1.4973255747463554E-4	0.08286834508180618	-0.1582745611667633	-0.0017080797115340829	0.04230118542909622	0.12799926102161407	-0.006111479829996824	0.011767559684813023	0.12731948494911194	0.016807379201054573	0.011993375606834888	-0.009575282223522663	-0.050848353654146194	0.04034886509180069	-0.010271061211824417	0.05362825468182564	0.04226510599255562	-0.1556229144334793	-0.029895363375544548	0.06440357863903046	-0.1574012190103531	0.02878093719482422	0.06445350497961044	0.24467089772224426	-0.013644235208630562	-0.024633076041936874	0.2217959314584732	-0.012425199151039124	-0.020357511937618256	0.0673307403922081	-0.053545303642749786	0.018755672499537468	0.03136814385652542	-0.07078268378973007	0.011924165301024914	-0.013639944605529308	-0.041236426681280136	7.053695153445005E-4	-0.02852473221719265
Dasypus nov 1-6-6-85	0.2683785557746887	0.0036286336835473776	-0.023156698793172836	0.13864755630493164	0.0022645508870482445	0.012058970518410206	-0.047786206007003784	0.0013784439070150256	0.0747254490852356	-0.1179802194237709	4.372661642264575E-4	0.0785561054944992	-0.14959843456745148	-0.0018513164250180125	0.0415925532579422	0.13216599822044373	-0.009822351858019829	0.012732853181660175	0.132889524102211	0.017332719638943672	0.012506227940320969	-0.01674443483352661	-0.04598512500524521	0.034829650074243546	-0.01858622021973133	0.04949333146214485	0.03534872457385063	-0.1438085436820984	-0.024438418447971344	0.06514688581228256	-0.14589549601078033	0.02452743425965309	0.0633879154920578	0.248430073261261	-0.014700230211019516	-0.027172014117240906	0.23109547793865204	-0.015320191159844398	-0.025003012269735336	0.07273447513580322	-0.0466822125017643	0.013799178414046764	0.0245558749884367	-0.06801237910985947	0.007890449836850166	-0.015864474698901176	-0.04001447558403015	0.002933229086920619	-0.03108493611216545
Dasypus nov 82-9-30-31	0.268862247467041	0.007993996143341064	-0.024590956047177315	0.136858269572258	0.0037740622647106647	0.010923885740339756	-0.04839060455560684	0.0019464805955067277	0.07984410226345062	-0.1281730979681015	9.742432303028181E-5	0.07998711615800858	-0.15306368470191956	0.0017825333634391427	0.046451155096292496	0.13443225622177124	-0.006946389097720385	0.011064989492297173	0.13442462682724	0.015657585114240646	0.010305489413440228	-0.014727586880326271	-0.04822923243045807	0.043965715914964676	-0.012674734927713871	0.050212562084198	0.044375546276569366	-0.15484410524368286	-0.028453150764107704	0.06283401697874069	-0.15373511612415314	0.028082964941859245	0.06297121942043304	0.25133395195007324	-0.01117615308612585	-0.02616669423878193	0.22118309140205383	-0.010790612548589706	-0.020505081862211227	0.0609305165708065	-0.05937349423766136	0.015573940239846706	0.027059117332100868	-0.07556460052728653	0.010617909952998161	-0.01609540730714798	-0.040318310260772705	0.0034389998763799667	-0.028737805783748627
Dasypus nov 3-7-7-146	0.27248460054397583	0.006905173882842064	-0.02623247727751732	0.12902401387691498	0.0028840459417551756	0.016124140471220016	-0.04453752562403679	0.0023264409974217415	0.07671845704317093	-0.11431434750556946	1.5954340051393956E-4	0.0793529599905014	-0.15305882692337036	-0.0023473105393350124	0.045108795166015625	0.1279992312192917	-0.008465872146189213	0.016064750030636787	0.1273581087589264	0.015310144051909447	0.015631351619958878	-0.010331283323466778	-0.04782576858997345	0.03798108547925949	-0.011734332889318466	0.05244158208370209	0.03851652517914772	-0.14093570411205292	-0.024317247793078423	0.06555655598640442	-0.14380867779254913	0.02385750599205494	0.06684845685958862	0.2524583339691162	-0.013390278443694115	-0.02510671690106392	0.22746561467647552	-0.012278568930923939	-0.0204449575394392	0.06968986988067627	-0.049875397235155106	0.020440561696887016	0.027425795793533325	-0.06994124501943588	0.0070819370448589325	-0.018577609211206436	-0.03749733790755272	-7.606655708514154E-4	-0.03176932409405708
Dasypus nov 3-9-4-102	0.26904013752937317	0.007925529032945633	-0.024254566058516502	0.13491909205913544	0.00435009365901351	0.013901570811867714	-0.053217943757772446	0.0015227426774799824	0.07941718399524689	-0.12096003443002701	-3.1094381120055914E-4	0.07904955744743347	-0.15061667561531067	-3.894376859534532E-4	0.04853649437427521	0.13051004707813263	-0.010803105309605598	0.013691768050193787	0.13058927655220032	0.018632592633366585	0.013191813603043556	-0.015146639198064804	-0.04859303683042526	0.04274184629321098	-0.012103356420993805	0.050949081778526306	0.04129894822835922	-0.1474248468875885	-0.027093349024653435	0.06176504120230675	-0.14654690027236938	0.025592140853405	0.06383651494979858	0.24608811736106873	-0.012363182380795479	-0.026665804907679558	0.23286524415016174	-0.012031624093651772	-0.021831873804330826	0.06176958233118057	-0.05278327688574791	0.02090448886156082	0.03108728677034378	-0.06869764626026154	0.012964838184416294	-0.015083464793860912	-0.042183004319667816	-2.0139093976467848E-4	-0.029627447947859764
Dasypus nov 1-6-6-84	0.2631361186504364	0.007876995019614697	-0.02307986095547676	0.1317669004201889	0.00380713096819818	0.01505929883569479	-0.04923439025878906	0.0014874122571200132	0.0807112529873848	-0.1259039342403412	-2.908354508690536E-4	0.07916367799043655	-0.1567237228155136	-0.0015419217525050044	0.04156436026096344	0.13188675045967102	-0.013990798033773899	0.011399363167583942	0.1328711062669754	0.018544334918260574	0.012089811265468597	-0.011788731440901756	-0.05046095699071884	0.0384548157453537	-0.013795378617942333	0.05213426798582077	0.03827774524688721	-0.15287552773952484	-0.03156522661447525	0.06447529792785645	-0.15415383875370026	0.02963624894618988	0.06386410444974899	0.245064377784729	-0.012799755670130253	-0.02747117541730404	0.2317938655614853	-0.01318369247019291	-0.023575114086270332	0.06825979053974152	-0.051038216799497604	0.020695265382528305	0.024815047159790993	-0.07269340753555298	0.010915730148553848	-0.01582728885114193	-0.042695414274930954	0.0021884506568312645	-0.030691958963871002
Dasypus nov 5-7-5-22	0.2788839340209961	0.0059172180481255054	-0.023659417405724525	0.12877380847930908	0.002886613365262747	0.014121746644377708	-0.05365017428994179	8.088829345069826E-4	0.07374131679534912	-0.11433752626180649	-1.1361949145793915E-4	0.07635336369276047	-0.13825316727161407	-0.001155705307610333	0.0377429835498333	0.12107738852500916	-0.008230023086071014	0.016559766605496407	0.12150753289461136	0.015698783099651337	0.0169991347938776	-0.02662745490670204	-0.04861730337142944	0.04080872982740402	-0.028978541493415833	0.05261418595910072	0.035706713795661926	-0.13881316781044006	-0.02921355701982975	0.06611843407154083	-0.14237508177757263	0.02584291622042656	0.06461852043867111	0.2583959996700287	-0.014034939929842949	-0.03162018954753876	0.24023017287254333	-0.013804948888719082	-0.029779735952615738	0.05494057387113571	-0.06360060721635818	0.017317987978458405	0.022322606295347214	-0.0719827264547348	0.01573915034532547	-0.021548256278038025	-0.04376121610403061	0.008569748140871525	-0.03778621554374695
Dasypus nov 28-10-11-54	0.2757720947265625	0.0039098202250897884	-0.021548038348555565	0.125299870967865	0.004230140708386898	0.018841594457626343	-0.048352692276239395	7.545540574938059E-4	0.07924812287092209	-0.1165001317858696	-0.001044437405653298	0.07897866517305374	-0.1490708738565445	-0.001123136724345386	0.038164712488651276	0.12948842346668243	-0.0076033081859350204	0.015385913662612438	0.12893299758434296	0.016246765851974487	0.015282906591892242	-0.015384470112621784	-0.04666529595851898	0.04090701788663864	-0.018480334430933	0.050749536603689194	0.040101308375597	-0.14445941150188446	-0.028778310865163803	0.06532961130142212	-0.14554716646671295	0.024277277290821075	0.06522972136735916	0.2541050612926483	-0.014853086322546005	-0.02430454082787037	0.2306187003850937	-0.012663714587688446	-0.019613150507211685	0.06986244022846222	-0.053320351988077164	0.012590846046805382	0.02365228347480297	-0.07186633348464966	0.011182207614183426	-0.01692957989871502	-0.03927118703722954	0.0042001595720648766	-0.03330882638692856
Dasypus nov 11-10-27-3	0.26705414056777954	0.0064755757339298725	-0.02043912373483181	0.14156270027160645	0.005538847763091326	0.010689027607440948	-0.043686673045158386	4.6844835742376745E-4	0.0738266184926033	-0.11937621235847473	-9.806096786633134E-4	0.07709052413702011	-0.15240594744682312	-0.0016313150990754366	0.033876508474349976	0.13318894803524017	-0.005294830072671175	0.01287912204861641	0.13163262605667114	0.015557453967630863	0.012854375876486301	-0.015406543388962746	-0.04788507893681526	0.03888766095042229	-0.016931137070059776	0.05011605843901634	0.040506161749362946	-0.14654842019081116	-0.024409020319581032	0.06217086687684059	-0.14742542803287506	0.02043280191719532	0.0631876066327095	0.24572841823101044	-0.013145032338798046	-0.025414999574422836	0.22625179588794708	-0.014875358901917934	-0.022763291373848915	0.06571274995803833	-0.05189858376979828	0.020055977627635002	0.025815028697252274	-0.06927172839641571	0.017021887004375458	-0.017183471471071243	-0.039104659110307693	0.004353013355284929	-0.029229125007987022
Dasypus nov 84-357	0.268494188785553	0.009974438697099686	-0.023617466911673546	0.13750484585762024	0.004762634169310331	0.009093686006963253	-0.05027375742793083	0.0017560656415298581	0.08000364154577255	-0.12064095586538315	-3.660673974081874E-5	0.07746459543704987	-0.15151135623455048	-0.0013279190752655268	0.039627209305763245	0.12946975231170654	-0.0058708228170871735	0.011254142969846725	0.13032348453998566	0.016308506950736046	0.010064374655485153	-0.028829891234636307	-0.049218714237213135	0.04055127874016762	-0.030394116416573524	0.05105525255203247	0.04092690348625183	-0.14521655440330505	-0.026350805535912514	0.06516490131616592	-0.1456749141216278	0.022429877892136574	0.06703611463308334	0.2488233745098114	-0.013170244172215462	-0.025472337380051613	0.2328568398952484	-0.013464986346662045	-0.025256533175706863	0.07092603296041489	-0.04671832546591759	0.021388962864875793	0.029246263206005096	-0.06858665496110916	0.016692139208316803	-0.02140229567885399	-0.04329928755760193	0.002625228138640523	-0.035460274666547775
Dasypus nov 26-1-12-22	0.270292729139328	0.007070313207805157	-0.020802561193704605	0.13093577325344086	0.00556770246475935	0.010874141938984394	-0.04339330643415451	0.0012885520700365305	0.07674038410186768	-0.11768129467964172	-5.546697066165507E-4	0.07915975153446198	-0.14707276225090027	-0.00200858386233449	0.03989934176206589	0.13281694054603577	-0.007801924832165241	0.007590419612824917	0.13189047574996948	0.017591489478945732	0.007465924136340618	-0.024242660030722618	-0.047665923833847046	0.04533247649669647	-0.02637108601629734	0.05093531310558319	0.04269982874393463	-0.14328528940677643	-0.025246387347579002	0.06818176060914993	-0.1432746797800064	0.026359884068369865	0.06827210634946823	0.25107279419898987	-0.011321074329316616	-0.02404293790459633	0.22505038976669312	-0.008369994349777699	-0.02005974017083645	0.07021822035312653	-0.04936113953590393	0.017092129215598106	0.02829344943165779	-0.07071399688720703	0.01566978730261326	-0.019248005002737045	-0.04262286052107811	0.0023183501325547695	-0.035905517637729645
Dasypus nov 65-5-18-2	0.27346083521842957	0.006568868178874254	-0.025234946981072426	0.13408313691616058	0.00379608990624547	0.011826422065496445	-0.04796551540493965	5.00007881782949E-4	0.07828906178474426	-0.11827713996171951	-0.0017902805702760816	0.07450493425130844	-0.15033796429634094	-0.0011504790745675564	0.03130952641367912	0.13514497876167297	-0.005868404172360897	0.011724461801350117	0.13464517891407013	0.014097734354436398	0.011367465369403362	-0.012121702544391155	-0.046284500509500504	0.036952052265405655	-0.015139655210077763	0.04823046550154686	0.04019564390182495	-0.1437285989522934	-0.027196316048502922	0.06540432572364807	-0.1453319936990738	0.025408774614334106	0.06530032306909561	0.2523471415042877	-0.011309643276035786	-0.024706631898880005	0.2259412556886673	-0.009692838415503502	-0.018065979704260826	0.07195385545492172	-0.05199682340025902	0.019094791263341904	0.027368484064936638	-0.06881054490804672	0.011298630386590958	-0.01928470842540264	-0.04035342484712601	0.002638677367940545	-0.031962111592292786
Dasypus nov 28-10-11-53	0.2665458023548126	0.007761311251670122	-0.021575486287474632	0.14309607446193695	0.0031208230648189783	0.006692090071737766	-0.04783695936203003	9.344173013232648E-4	0.07525936514139175	-0.1263161152601242	-0.0010709462221711874	0.07927949726581573	-0.1502646505832672	-0.002442094963043928	0.038304511457681656	0.13917745649814606	-0.008227129466831684	0.007521427236497402	0.13554133474826813	0.016133088618516922	0.008107902482151985	-0.014591146260499954	-0.04947035759687424	0.041593458503484726	-0.015784872695803642	0.052660126239061356	0.04037589952349663	-0.15131133794784546	-0.02795569598674774	0.06084867939352989	-0.1507173329591751	0.027881676331162453	0.0625298023223877	0.24363623559474945	-0.010569051839411259	-0.026252249255776405	0.22038766741752625	-0.01149617787450552	-0.020241515710949898	0.06474132835865021	-0.05361706390976906	0.01595848612487316	0.024508358910679817	-0.07399198412895203	0.01707996055483818	-0.019175663590431213	-0.04205828160047531	0.0036537109408527613	-0.030613398179411888
Dasypus nov 3-9-4-101	0.2678300738334656	0.004418535623699427	-0.024351203814148903	0.14725568890571594	0.005343403201550245	0.009000926278531551	-0.05013898387551308	0.0022969511337578297	0.08185556530952454	-0.12779363989830017	-0.0018260006327182055	0.079728864133358	-0.15392494201660156	-0.0016010229010134935	0.034635309129953384	0.14016984403133392	-0.008659281767904758	0.0077699460089206696	0.1396419107913971	0.017316551879048347	0.008305929601192474	-0.007986948825418949	-0.05028276517987251	0.040657516568899155	-0.01052438747137785	0.05390579625964165	0.04101294279098511	-0.14715629816055298	-0.03133375942707062	0.057055361568927765	-0.15188713371753693	0.027175795286893845	0.061487097293138504	0.2455226480960846	-0.014160717837512493	-0.024918708950281143	0.2222810536623001	-0.010742977261543274	-0.017875906080007553	0.06337626278400421	-0.05553141236305237	0.016045216470956802	0.02258332632482052	-0.07192614674568176	0.013362612575292587	-0.012055246159434319	-0.04082110896706581	-0.0016608457081019878	-0.0281844325363636
Dasypus nov 82-7-26-12	0.26539209485054016	0.0065158698707818985	-0.025055987760424614	0.1368701457977295	0.0033287492115050554	0.01506575383245945	-0.04105093330144882	0.0011524377623572946	0.08232370764017105	-0.11596520990133286	-1.2048870848957449E-4	0.07499392330646515	-0.1490684449672699	-0.0011783692752942443	0.037995029240846634	0.13084201514720917	-0.010852445848286152	0.01575739122927189	0.13048577308654785	0.016489475965499878	0.016058431938290596	-0.0188674945384264	-0.05031871423125267	0.03743606433272362	-0.024160236120224	0.052303116768598557	0.038276441395282745	-0.14034965634346008	-0.02431732974946499	0.0666855052113533	-0.14156585931777954	0.023250360041856766	0.06675965338945389	0.24597008526325226	-0.014455386437475681	-0.029598340392112732	0.22228041291236877	-0.014176862314343452	-0.02367984876036644	0.07593213021755219	-0.049444183707237244	0.02476772479712963	0.029820367693901062	-0.06942431628704071	0.018186276778578758	-0.018218474462628365	-0.042709290981292725	0.004266487434506416	-0.03325575962662697
Dasypus nov 82-9-30-32	0.26869305968284607	0.007244874723255634	-0.019090062007308006	0.14112365245819092	0.0022124324459582567	0.011211030185222626	-0.04893171042203903	6.279721856117249E-4	0.07772060483694077	-0.1184052899479866	-0.002819183049723506	0.08186602592468262	-0.14740483462810516	-0.0013648439198732376	0.0365755558013916	0.1371060013771057	-0.00935546588152647	0.010308013297617435	0.13622623682022095	0.01612108387053013	0.010770246386528015	-0.014478707686066628	-0.04591592773795128	0.041863247752189636	-0.013200540095567703	0.048614829778671265	0.043421145528554916	-0.14247602224349976	-0.02851591445505619	0.06937886029481888	-0.14340384304523468	0.024358011782169342	0.07060107588768005	0.25076520442962646	-0.012308292090892792	-0.022251181304454803	0.22638686001300812	-0.012304317206144333	-0.018065640702843666	0.06822845339775085	-0.04922312870621681	0.016827261075377464	0.022373519837856293	-0.07336663454771042	0.01090941671282053	-0.018251832574605942	-0.04089389741420746	8.113507064990699E-4	-0.03155486658215523
Dasypus nov 93-1-1-17	0.2741676867008209	0.007754032500088215	-0.024656612426042557	0.12819364666938782	0.004752283915877342	0.01385563425719738	-0.04762476310133934	2.3715876159258187E-4	0.07762342691421509	-0.12494178116321564	-2.5785560137592256E-4	0.07888229191303253	-0.1485137939453125	-5.554225062951446E-4	0.034268997609615326	0.12406889349222183	-0.005173868965357542	0.014392668381333351	0.1246584802865982	0.013338434509932995	0.014674024656414986	-0.014429633505642414	-0.05071989819407463	0.03891541436314583	-0.012418144382536411	0.05316561833024025	0.03759624809026718	-0.14924289286136627	-0.02569758892059326	0.06577834486961365	-0.15141139924526215	0.025204217061400414	0.0657656192779541	0.25295138359069824	-0.011506017297506332	-0.027330754324793816	0.22799041867256165	-0.008669039234519005	-0.020748339593410492	0.06598948687314987	-0.05367198958992958	0.018754305317997932	0.021153410896658897	-0.0697755366563797	0.01320610661059618	-0.017549734562635422	-0.041322577744722366	-2.3873287136666477E-4	-0.03298315778374672
Dasypus nov 98-3-2-153	0.269974023103714	0.007960446178913116	-0.03276794031262398	0.1256408840417862	0.004104631952941418	0.01896543800830841	-0.05642076954245567	0.0014719332102686167	0.07814861834049225	-0.11769432574510574	-6.114981370046735E-4	0.07296257466077805	-0.15131312608718872	-8.44498339574784E-4	0.03424294665455818	0.12487748265266418	-0.009805909357964993	0.01748507097363472	0.12435339391231537	0.01682662032544613	0.01725360006093979	-0.025053689256310463	-0.050057221204042435	0.03571896255016327	-0.02892356738448143	0.05114521086215973	0.03983798995614052	-0.14592401683330536	-0.0296793133020401	0.060474757105112076	-0.14600230753421783	0.027643339708447456	0.06106693297624588	0.25072166323661804	-0.012728558853268623	-0.031561899930238724	0.22789917886257172	-0.012602345086634159	-0.028757749125361443	0.06477580219507217	-0.05573054030537605	0.024570943787693977	0.02702273428440094	-0.07329747080802917	0.018486378714442253	-0.018310267478227615	-0.04378232732415199	0.0031666753347963095	-0.03053831309080124
Dasypus nov 14-4-25-86	0.2670605480670929	0.008060095831751823	-0.02421657182276249	0.12302064895629883	0.004726139362901449	0.011240745894610882	-0.04444905370473862	6.65391213260591E-4	0.07744656503200531	-0.1251867413520813	2.8898630989715457E-4	0.07992621511220932	-0.15616083145141602	4.72599029308185E-4	0.04315453767776489	0.12731021642684937	-0.0065992348827421665	0.008530206978321075	0.1263236254453659	0.01712787337601185	0.00806587003171444	-0.012193381786346436	-0.047610197216272354	0.04253896325826645	-0.008769407868385315	0.0509251169860363	0.0404747799038887	-0.15512137115001678	-0.026270126923918724	0.06556826084852219	-0.15587320923805237	0.025438321754336357	0.06725847721099854	0.24889416992664337	-0.009544909000396729	-0.026581281796097755	0.22904187440872192	-0.007189224474132061	-0.021882086992263794	0.05564054846763611	-0.05680195242166519	0.01923523098230362	0.02233775332570076	-0.07311314344406128	0.014462689869105816	-0.026733865961432457	-0.035441868007183075	-0.002851043362170458	-0.029204295948147774
Dasypus nov 98-10-3-23	0.26734137535095215	0.0068995230831205845	-0.02531394734978676	0.12557348608970642	0.003925344906747341	0.014246685430407524	-0.05245061591267586	0.001080979942344129	0.0820612981915474	-0.1235741600394249	0.0013662741985172033	0.07693912088871002	-0.14718247950077057	-6.634370656684041E-4	0.03611713647842407	0.1209615096449852	-0.008891607634723186	0.013664036989212036	0.12040070444345474	0.01638302579522133	0.0139183159917593	-0.012511922046542168	-0.05418543517589569	0.041666872799396515	-0.016026325523853302	0.05583273991942406	0.04302510619163513	-0.14812232553958893	-0.025051932781934738	0.059942834079265594	-0.14834818243980408	0.02517540380358696	0.06180077791213989	0.24816443026065826	-0.012952804565429688	-0.027583297342061996	0.22609040141105652	-0.011636256240308285	-0.023959051817655563	0.06834563612937927	-0.0588696226477623	0.01752168871462345	0.023909403011202812	-0.07786273956298828	0.021335868164896965	-0.015442783012986183	-0.047660745680332184	0.013344543986022472	-0.031042590737342834
Dasypus nov 521183	0.2663983106613159	0.006790738552808762	-0.02330874279141426	0.13776172697544098	0.0031914389692246914	0.0030534854158759117	-0.051275722682476044	0.0016882087802514434	0.07937492430210114	-0.1261453479528427	6.405128806363791E-5	0.07637033611536026	-0.15031158924102783	-7.234658114612103E-4	0.04623282700777054	0.13931487500667572	-0.007704831659793854	2.835213381331414E-4	0.1387895792722702	0.016320370137691498	9.804593719309196E-5	-0.0272467453032732	-0.05053035914897919	0.03870920091867447	-0.03053836151957512	0.051714200526475906	0.03825727850198746	-0.15227852761745453	-0.026779726147651672	0.06261248141527176	-0.15595412254333496	0.026254374533891678	0.06181899458169937	0.25122037529945374	-0.010130076669156551	-0.025987859815359116	0.22558876872062683	-0.011214308440685272	-0.023811638355255127	0.06371738016605377	-0.04797576740384102	0.02064582146704197	0.024751590564846992	-0.06751549988985062	0.018704216927289963	-0.020723100751638412	-0.041644804179668427	0.010102958418428898	-0.03551109507679939
Dasypus nov 26-1-12-21	0.25967782735824585	0.006937230937182903	-0.02392107993364334	0.14938385784626007	0.004109922796487808	0.00685227382928133	-0.049876268953084946	0.001984575530514121	0.0817323550581932	-0.12730881571769714	-5.847573629580438E-4	0.07616090774536133	-0.15739691257476807	-6.507771904580295E-4	0.034717097878456116	0.13608242571353912	-0.010121766477823257	0.008554893545806408	0.1372206062078476	0.015599049627780914	0.009507287293672562	-0.010274555534124374	-0.04673263058066368	0.043444857001304626	-0.016082700341939926	0.050720829516649246	0.04344230890274048	-0.15252162516117096	-0.030775979161262512	0.05817022919654846	-0.15494459867477417	0.026696044951677322	0.05904523655772209	0.23948216438293457	-0.013664131984114647	-0.025901297107338905	0.22457051277160645	-0.01203098800033331	-0.022109251469373703	0.07758757472038269	-0.04795035347342491	0.017829153686761856	0.02915526181459427	-0.07184801250696182	0.011416665278375149	-0.013049357570707798	-0.040424894541502	0.008067091926932335	-0.03246697410941124
Dasypus nov 5-7-5-21	0.28183653950691223	0.008447042666375637	-0.018068036064505577	0.130076065659523	0.004865040071308613	0.013271412812173367	-0.0524769127368927	3.269716980867088E-4	0.07358865439891815	-0.11359085142612457	0.0013543900568038225	0.07864277809858322	-0.14039236307144165	3.4397534909658134E-4	0.041905298829078674	0.1305563896894455	-0.008057213388383389	0.010369495488703251	0.1292160302400589	0.017488554120063782	0.009714853949844837	-0.031852249056100845	-0.04997721686959267	0.03783706948161125	-0.0327790305018425	0.05114367604255676	0.036362774670124054	-0.14046499133110046	-0.02445233054459095	0.06645011156797409	-0.13911162316799164	0.026073822751641273	0.06730204075574875	0.25896668434143066	-0.01155906356871128	-0.024009671062231064	0.23436884582042694	-0.011620864272117615	-0.023784810677170753	0.061167240142822266	-0.05532312020659447	0.014553072862327099	0.023803969845175743	-0.07192790508270264	0.01379274483770132	-0.02011663280427456	-0.04523225873708725	0.008773639798164368	-0.03505689278244972
Dasypus nov 98-10-3-22	0.26626813411712646	0.009439896792173386	-0.027891386300325394	0.12979565560817719	0.00594428600743413	0.012981194071471691	-0.050910379737615585	0.002005317946895957	0.07820774614810944	-0.12063988298177719	4.6617852058261633E-4	0.08243885636329651	-0.15122509002685547	-0.0022248453460633755	0.03804055601358414	0.12901656329631805	-0.0075017777271568775	0.011330056004226208	0.12840613722801208	0.017523223534226418	0.011308278888463974	-0.01948285475373268	-0.05255000665783882	0.04080868884921074	-0.02280019037425518	0.05396077781915665	0.0373317115008831	-0.14850707352161407	-0.025917217135429382	0.06545638293027878	-0.14902621507644653	0.02505873516201973	0.06678564101457596	0.2477787435054779	-0.011002217419445515	-0.028048653155565262	0.22996200621128082	-0.010813361965119839	-0.02412707544863224	0.05800127983093262	-0.06306403875350952	0.012767966836690903	0.020142385736107826	-0.07621227204799652	0.016091734170913696	-0.015703631564974785	-0.0454181507229805	2.4544960979255848E-5	-0.03195635601878166
Dasypus hyb 205706	0.2509978413581848	0.006099306046962738	-0.015214632265269756	0.13398683071136475	0.0040050954557955265	0.01348966732621193	-0.04471281170845032	0.001345587195828557	0.08285369724035263	-0.12584646046161652	-6.141583435237408E-4	0.08816716820001602	-0.15700982511043549	-0.0020622648298740387	0.06107901781797409	0.13585156202316284	-0.01067215483635664	0.011128382757306099	0.13390958309173584	0.019250057637691498	0.010314062237739563	0.003972175531089306	-0.049956757575273514	0.03721959516406059	0.002760188654065132	0.053242672234773636	0.03770944103598595	-0.1498357504606247	-0.03064054064452648	0.06858965009450912	-0.14972521364688873	0.03082231432199478	0.06732580810785294	0.23293209075927734	-0.011788510717451572	-0.01898866519331932	0.22004663944244385	-0.011778110638260841	-0.015077055431902409	0.06872234493494034	-0.05312582477927208	0.014822548255324364	0.033478375524282455	-0.06632383912801743	0.007976231165230274	-0.0059737227857112885	-0.04064738750457764	-0.002831290476024151	-0.02404102124273777
Dasypus hyb 205721	0.251840740442276	0.006342409644275904	-0.02006891556084156	0.13969936966896057	0.003334364388138056	0.013157272711396217	-0.045567773282527924	4.3884760816581547E-4	0.07662272453308105	-0.12295805662870407	-3.9653529529459774E-4	0.08461448550224304	-0.15821151435375214	-0.0017900941893458366	0.06023118272423744	0.12589538097381592	-0.013596841134130955	0.015575372613966465	0.12687525153160095	0.020004533231258392	0.01547788456082344	0.001113590900786221	-0.052507612854242325	0.03343420475721359	-8.635665290057659E-4	0.0556628555059433	0.03433314338326454	-0.15254345536231995	-0.02340671233832836	0.06953135132789612	-0.15402688086032867	0.02318395860493183	0.06707101315259933	0.2385401725769043	-0.011506864801049232	-0.02116347849369049	0.21538226306438446	-0.009920342825353146	-0.014083290472626686	0.0698288083076477	-0.05391669645905495	0.017856422811746597	0.030715802684426308	-0.06980603188276291	0.0066489954479038715	-0.008005782961845398	-0.04303797706961632	-8.127655019052327E-4	-0.030454149469733238
Dasypus hyb 205693	0.2566465139389038	0.0066349501721560955	-0.025303179398179054	0.13817770779132843	0.0019914458971470594	0.015156743116676807	-0.046835847198963165	3.1542987562716007E-4	0.08322113007307053	-0.12444433569908142	4.997509531676769E-4	0.08448716253042221	-0.16247445344924927	-0.001265794038772583	0.05135245993733406	0.13933934271335602	-0.01221739873290062	0.012336887419223785	0.14050470292568207	0.01598670706152916	0.013875068165361881	-0.0011812573065981269	-0.05418047308921814	0.03770032897591591	-0.002885565161705017	0.05620942264795303	0.03685883432626724	-0.14884522557258606	-0.030908890068531036	0.06859912723302841	-0.1490551382303238	0.029490718618035316	0.06628724932670593	0.23629361391067505	-0.010218989104032516	-0.024058351293206215	0.21919839084148407	-0.011052072048187256	-0.018610170111060143	0.06258536875247955	-0.05479925870895386	0.01014757715165615	0.03129750117659569	-0.06724876165390015	0.0031502817291766405	-0.01019369438290596	-0.0397854819893837	-0.001408967887982726	-0.02626500464975834
Dasypus hyb 096511	0.2613649368286133	0.0026708191726356745	-0.02845626324415207	0.13818010687828064	0.00616496754810214	0.01673491857945919	-0.05037124082446098	0.0018952097743749619	0.07975847274065018	-0.13148970901966095	4.604014684446156E-4	0.07995259761810303	-0.16125385463237762	-0.001875316258519888	0.0456087626516819	0.1311914622783661	-0.011395576409995556	0.013653021305799484	0.13041822612285614	0.02197391912341118	0.01364181935787201	0.0031243176199495792	-0.05126208811998367	0.03662647679448128	0.0011690265964716673	0.056095387786626816	0.037518490105867386	-0.15333101153373718	-0.03133836016058922	0.06416451930999756	-0.15494677424430847	0.026149341836571693	0.06323044747114182	0.23574568331241608	-0.014892355538904667	-0.024181729182600975	0.2191723883152008	-0.015008891001343727	-0.019569801166653633	0.06702800840139389	-0.04839698225259781	0.01762472651898861	0.03581308200955391	-0.0650429055094719	0.007441305555403233	-0.004118184559047222	-0.03905933350324631	4.6181189827620983E-4	-0.022149566560983658
Dasypus sept 3-9-5-155	0.2512509524822235	0.005287833511829376	-0.02481932006776333	0.13095809519290924	0.004682852886617184	0.016548113897442818	-0.03960403427481651	5.795582546852529E-4	0.08737257122993469	-0.12643387913703918	-0.0014191155787557364	0.0876288190484047	-0.1639106422662735	-0.001156763406470418	0.0495380200445652	0.1326281726360321	-0.009992958046495914	0.0130304004997015	0.1307990550994873	0.01807084120810032	0.014330758713185787	0.004541120491921902	-0.05463336780667305	0.04244968667626381	9.118107263930142E-4	0.05872735008597374	0.04238281026482582	-0.14952974021434784	-0.03228699788451195	0.06698397547006607	-0.150841623544693	0.03209903463721275	0.06547968089580536	0.2341138869524002	-0.010775517672300339	-0.022974446415901184	0.216161847114563	-0.011464773677289486	-0.01856556162238121	0.08121538907289505	-0.04296562820672989	0.01888204552233219	0.026475125923752785	-0.06970202177762985	0.006423265673220158	-0.007135466672480106	-0.04520842805504799	-0.003883285215124488	-0.030310509726405144
Dasypus sept 86-10-4-16	0.2572968900203705	0.003097952576354146	-0.02306164987385273	0.12809079885482788	0.006347233895212412	0.01745796948671341	-0.045202549546957016	0.0012563028139993548	0.08014614880084991	-0.13343743979930878	2.6989553589373827E-4	0.08411587029695511	-0.16269613802433014	-5.97901816945523E-4	0.031312018632888794	0.12016775459051132	-0.0105226319283247	0.018611839041113853	0.11913389712572098	0.01904226653277874	0.019286511465907097	0.0018010750645771623	-0.047618795186281204	0.03547727316617966	-8.040445391088724E-4	0.05204319953918457	0.03602171689271927	-0.1568703055381775	-0.03020063228905201	0.06487995386123657	-0.15741054713726044	0.029102997854351997	0.060989417135715485	0.24045111238956451	-0.013749358244240284	-0.026203284040093422	0.22353234887123108	-0.013503305613994598	-0.019755229353904724	0.0665631890296936	-0.051466066390275955	0.017850838601589203	0.032609738409519196	-0.06612665951251984	0.00534591032192111	-0.010173534043133259	-0.03851690888404846	2.5828214347711764E-5	-0.022576313465833664
Dasypus sept 3-7-7-152	0.2556009590625763	0.008625100366771221	-0.022420834749937057	0.12777389585971832	0.006795914378017187	0.01931844837963581	-0.0409553162753582	0.00203102664090693	0.08105119317770004	-0.13422025740146637	0.002623512875288725	0.08807776123285294	-0.1653042435646057	0.0012903056340292096	0.04537366330623627	0.13373026251792908	-0.007361677009612322	0.01597103290259838	0.13191163539886475	0.01783105544745922	0.015505249612033367	0.010171303525567055	-0.05203980207443237	0.03369606286287308	0.007184630259871483	0.058281078934669495	0.02946643903851509	-0.15178842842578888	-0.03290976583957672	0.0713486447930336	-0.15163496136665344	0.03322489559650421	0.07240984588861465	0.23925697803497314	-0.007776358630508184	-0.02102341316640377	0.2167767882347107	-0.010399917140603065	-0.01592816598713398	0.06874798983335495	-0.05394458398222923	0.018842553719878197	0.03957543522119522	-0.06728675961494446	0.0030990829691290855	0.008550665341317654	-0.04847003519535065	-0.003918728791177273	-0.022852635011076927
[truncated: 167 more columns]
